# Supplementary material for: An association test of the spatial distribution of rare missense variants within protein structures identifies Alzheimer's disease–related patterns
Source: HighWire-hosted journal article supplement (doi:10.1101/gr.276069.121), 2022-02-24
Supplement: Supplemental_Tables.xlsx [file Supplemental_Tables.xlsx]

## Sheet: Supplemental_Table_S1
Supplemental Table S1. (A) POKEMON test with structure kernel for 31 genes with available structures from PDB (B) POKEMON test results for genes with pathological variants excluded.
Table S1A
Gene	PDB entry	Phenotype	p-value
PRSS1	1fxy	Cancer	3.04407e-10
POT1	1xjv	Cancer	2.5566e-09
MSH2	3thw	Cancer	3.02152e-09
TP53	6xre	Cancer	1e-08
RB1	4elj	Cancer	1.46279e-07
EGFR	1nql	Cancer	1.93349e-07
DICER1	5zak	Cancer	7.46637e-07
PRDM9	4ijd	Cancer	1.12795e-06
RECQL	2v1x	Cancer	1.32851e-06
MAP2K2	1s9i	Cancer	2.93403e-06
CHEK2	3i6u	Cancer	8.14932e-06
BLM	4cgz	Cancer	6.54958e-05
MLH1	4p7a	Cancer	0.00015693
PTPN11	4nwf	Cancer	0.0002703
PMS2	1h7s	Cancer	0.000332856
VHL	6r7f	Cancer	0.00042857
KIT	2e9w	Cancer	0.000533927
MET	1r0p	Cancer	0.00807326
CBL	1fbv	Cancer	0.0098401
MSH6	2o8e	Cancer	0.0106249
RET	2ivt	Cancer	0.0174094
MTAP	5tc5	Cancer	0.0453297
PAX5	1k78	Cancer	0.0504781
DDB2	4E54	Cancer	0.0701109
POLH	3jaa	Cancer	0.105433
HFE	1a6z	Cancer	0.195647
CDKN1B	1jsu	Cancer	0.213967
NF2	6cds	Cancer	0.251945
CDH1	6vel	Cancer	0.517169
MAX	3E37	Cancer	0.616146
MUTYH	3n5n	Cancer	0.935104
Table S1B
Gene	PDB entry	Phenotype	p-value	pathological variants
BLM	4cgz	pheno	6.54958e-05	15:91304245:C:T,15:91308549:C:T
MET	1r0p	pheno	0.00807326	7:116417464:A:G
MSH2	3thw	pheno	3.02152e-09	2:47703538:C:T
PMS2	1h7s	pheno	0.000332856	7:6026709:G:A
POT1	1xjv	pheno	2.55661e-09	7:124482937:G:A
PTPN11	4nwf	pheno	0.000226571	12:112888157:A:G
RET	2ivt	pheno	0.0764165	10:43614996:G:A,10:43615142:C:G,10:43617416:T:C
TP53	6xre	pheno	1e-08	17:7577509:C:T,17:7577539:G:A,17:7577547:C:A,17:7578257:C:A,17:7578457:C:A,17:7578475:G:A,17:7579358:C:A
VHL	6r7f	pheno	0.000455194	3:10191569:C:G

## Sheet: Supplemental_ Table_ S2
Supplemental Table S2. Full results for ADSP WES Discovery dataset with PDB structures.
			Model 0			Model 1
gene	pdb	pheno	pval	fdr		pval	fdr
ENSG00000095970_pdb	6xds	AD	3.59153e-07	3.35064e-05		0.00417715	0.00110571
ENSG00000137642_pdb	3wsy	AD	7.02203e-05	6.70129e-05		0.000104279	0.000134026
ENSG00000182578_pdb	4liq	AD	0.000518609	0.000100519		0.0027926	0.000636623
ENSG00000104972_pdb	6zdx	AD	0.000591647	0.000134026		0.00114524	0.000335064
ENSG00000187871_pdb	5vz4	AD	0.000654516	0.000167532		0.0349935	0.00743843
ENSG00000132199_pdb	4a35	AD	0.000721611	0.000201039		0.00243832	0.00056961
ENSG00000015475_pdb	2bid	AD	0.000757837	0.000234545		0.0107305	0.0020774
ENSG00000241370_pdb	6ahr	AD	0.000824189	0.000268052		2.06395e-05	6.70129e-05
ENSG00000248167_pdb	6ahr	AD	0.000824189	0.000301558		2.06392e-05	3.35064e-05
ENSG00000115221_pdb	4um9	AD	0.00146686	0.000335064		0.00377079	0.00100519
ENSG00000170855_pdb	4xzs	AD	0.00217613	0.000368571		0.0314582	0.00653376
ENSG00000111780_pdb	4xzs	AD	0.00217613	0.000402077		0.0314586	0.00656726
ENSG00000153975_pdb	6fge	AD	0.00222984	0.000435584		0.00227134	0.000502597
ENSG00000159763_pdb	3es6	AD	0.00258874	0.00046909		0.00431079	0.00113922
ENSG00000165806_pdb	1k88	AD	0.00285926	0.000502597		0.00153888	0.000402077
ENSG00000108582_pdb	5aq0	AD	0.00292523	0.000536103		0.00735918	0.00160831
ENSG00000184661_pdb	5d1z	AD	0.00298741	0.00056961		0.0196027	0.00395376
ENSG00000168078_pdb	5j0a	AD	0.00307906	0.000603116		0.0193317	0.00381974
ENSG00000167034_pdb	2l9r	AD	0.00341422	0.000636623		0.0288778	0.00609817
ENSG00000182985_pdb	4h5s	AD	0.00353423	0.000670129		0.0387886	0.00837661
ENSG00000131462_pdb	1z5v	AD	0.00380931	0.000703635		0.00675922	0.00144078
ENSG00000130720_pdb	4m7f	AD	0.00387625	0.000737142		0.050769	0.010454
ENSG00000223609_pdb	1shr	AD	0.00388324	0.000770648		0.00955356	0.00184285
ENSG00000173786_pdb	1woj	AD	0.00393546	0.000804155		0.000116067	0.000167532
ENSG00000170231_pdb	1o1u	AD	0.00400391	0.000837661		0.222565	0.0454683
ENSG00000129691_pdb	3rsn	AD	0.0041528	0.000871168		0.000843358	0.000268052
ENSG00000155561_pdb	5ijn	AD	0.00433082	0.000904674		0.0124911	0.00251298
ENSG00000120242_pdb	6jhd	AD	0.00552129	0.000938181		0.0342471	0.00717038
ENSG00000125449_pdb	7dvq	AD	0.00580064	0.000971687		0.0034459	0.000837661
ENSG00000248672_pdb	7jpt	AD	0.0060045	0.00100519		0.00859201	0.00167532
ENSG00000054219_pdb	7jpt	AD	0.0060045	0.0010387		0.00859233	0.00170883
ENSG00000266053_pdb	5xtb	AD	0.00605536	0.00107221		0.0761988	0.015748
ENSG00000178127_pdb	5xtb	AD	0.00609106	0.00110571		0.0632923	0.013034
ENSG00000125510_pdb	5dhg	AD	0.00628139	0.00113922		2.08606e-05	0.000100519
ENSG00000135723_pdb	3dad	AD	0.00652615	0.00117273		0.00351367	0.000938181
ENSG00000187266_pdb	1cn4	AD	0.00676815	0.00120623		0.00501901	0.00123974
ENSG00000189007_pdb	3dh1	AD	0.00692961	0.00123974		0.0451632	0.00954934
ENSG00000113916_pdb	4u2m	AD	0.00755218	0.00127325		0.0441136	0.00928129
ENSG00000228804_pdb	4u2m	AD	0.00755218	0.00130675		0.0441128	0.00924778
ENSG00000100490_pdb	4agu	AD	0.0076626	0.00134026		0.0259754	0.00556207
ENSG00000137509_pdb	3n2z	AD	0.00767336	0.00137376		0.00318636	0.000770648
ENSG00000166126_pdb	6gje	AD	0.00824415	0.00140727		0.0237025	0.00515999
ENSG00000185149_pdb	7ddz	AD	0.00839641	0.00144078		0.0467145	0.0098509
ENSG00000177663_pdb	5nan	AD	0.00859788	0.00147428		0.000368189	0.000201039
ENSG00000184254_pdb	5fhz	AD	0.00898491	0.00150779		0.0335506	0.00700285
ENSG00000149089_pdb	4m6r	AD	0.00925331	0.0015413		0.0251049	0.00536103
ENSG00000253736_pdb	6apx	AD	0.00966689	0.0015748		0.0377873	0.00807505
ENSG00000120129_pdb	6apx	AD	0.00966689	0.00160831		0.0377899	0.00810856
ENSG00000105329_pdb	5vqp	AD	0.00989214	0.00164182		0.00128651	0.000368571
ENSG00000259583_pdb	5fhz	AD	0.00991259	0.00167532		0.0363794	0.00770648
ENSG00000151552_pdb	1hdr	AD	0.0102375	0.00170883		0.0216777	0.0046574
ENSG00000266997_pdb	4c2j	AD	0.0106811	0.00174234		0.217699	0.0448986
ENSG00000187790_pdb	4bxo	AD	0.0109341	0.00177584		0.0209648	0.00452337
ENSG00000135740_pdb	3dad	AD	0.0110518	0.00180935		0.00489758	0.00120623
ENSG00000085552_pdb	1v5j	AD	0.0116237	0.00184285		0.580614	0.120958
ENSG00000163220_pdb	4ggf	AD	0.0116636	0.00187636		0.102065	0.020975
ENSG00000169902_pdb	5wri	AD	0.0117284	0.00190987		0.0962731	0.0197688
ENSG00000128609_pdb	5xtb	AD	0.0123904	0.00194337		0.00662078	0.00137376
ENSG00000071205_pdb	2mio	AD	0.0128945	0.00197688		0.076629	0.015815
ENSG00000261707_pdb	5t3p	AD	0.0132734	0.00201039		0.0596319	0.0121963
ENSG00000161326_pdb	2wgp	AD	0.0135193	0.00204389		0.0202736	0.00428883
ENSG00000165841_pdb	4gqs	AD	0.0145033	0.0020774		0.0371491	0.0077735
ENSG00000125871_pdb	5zyt	AD	0.0149685	0.00211091		0.0109525	0.00214441
ENSG00000125850_pdb	5zyt	AD	0.0149685	0.00214441		0.0109523	0.00211091
ENSG00000108679_pdb	1by2	AD	0.0154923	0.00217792		0.00301789	0.000737142
ENSG00000177465_pdb	3k2i	AD	0.0155985	0.00221143		0.0184012	0.0036522
ENSG00000204642_pdb	5iue	AD	0.0159416	0.00224493		0.0217526	0.00472441
ENSG00000136448_pdb	3iu1	AD	0.0162231	0.00227844		0.00376543	0.000971687
ENSG00000166523_pdb	3wh2	AD	0.0166988	0.00231195		0.199861	0.0406433
ENSG00000080815_pdb	4uis	AD	0.0168526	0.00234545		0.764052	0.156509
ENSG00000171135_pdb	6wvd	AD	0.0170462	0.00237896		0.0548378	0.0111576
ENSG00000169896_pdb	1na5	AD	0.0172024	0.00241246		0.0677676	0.0143408
ENSG00000115590_pdb	3o4o	AD	0.0173471	0.00244597		0.187238	0.0376948
ENSG00000146216_pdb	4btj	AD	0.0174414	0.00247948		0.13429	0.0271737
ENSG00000160293_pdb	2lnw	AD	0.017565	0.00251298		0.0341091	0.00706986
ENSG00000142002_pdb	6x6a	AD	0.0182494	0.00254649		0.0877664	0.0177584
ENSG00000197165_pdb	1z29	AD	0.0188641	0.00258		0.102594	0.0212096
ENSG00000165474_pdb	2zw3	AD	0.0189849	0.0026135		0.0780562	0.0160496
ENSG00000064703_pdb	2oxc	AD	0.019069	0.00264701		0.0123326	0.00241246
ENSG00000167748_pdb	1spj	AD	0.0191864	0.00268052		0.308984	0.0637963
ENSG00000148688_pdb	6ahr	AD	0.0195948	0.00271402		0.166683	0.0331379
ENSG00000138134_pdb	2znr	AD	0.0196303	0.00274753		0.102793	0.0212431
ENSG00000251165_pdb	3sor	AD	0.0196451	0.00278104		0.0420821	0.00874518
ENSG00000028528_pdb	4fzs	AD	0.0198135	0.00281454		0.336176	0.069928
ENSG00000112425_pdb	4rkk	AD	0.0201019	0.00284805		0.0269555	0.00576311
ENSG00000088727_pdb	3nwn	AD	0.0203027	0.00288155		0.0897555	0.0181605
ENSG00000213339_pdb	6h42	AD	0.0204996	0.00291506		0.0096393	0.00187636
ENSG00000170502_pdb	1q33	AD	0.0207415	0.00294857		0.215084	0.0442955
ENSG00000100433_pdb	4xdk	AD	0.021196	0.00298207		0.0835029	0.0171553
ENSG00000159231_pdb	2hrb	AD	0.021368	0.00301558		0.236523	0.0483163
ENSG00000171298_pdb	5kzw	AD	0.0215633	0.00304909		0.483211	0.101022
ENSG00000225855_pdb	1zw5	AD	0.0223381	0.00308259		0.00347441	0.000904674
ENSG00000204525_pdb	1efx	AD	0.0223497	0.0031161		0.586823	0.122265
ENSG00000172890_pdb	6ofb	AD	0.0226824	0.00314961		0.00801391	0.00164182
ENSG00000115956_pdb	1xx0	AD	0.0228497	0.00318311		0.0466056	0.00981739
ENSG00000129696_pdb	7ole	AD	0.0229089	0.00321662		0.145249	0.0293852
ENSG00000133706_pdb	6kid	AD	0.0232395	0.00325013		0.106809	0.0220808
ENSG00000255835_pdb	6lhm	AD	0.023633	0.00328363		0.0178085	0.00351818
ENSG00000143811_pdb	6lhm	AD	0.023633	0.00331714		0.0178086	0.00355168
ENSG00000174808_pdb	1iox	AD	0.0241484	0.00335064		0.0130208	0.00271402
ENSG00000171435_pdb	5kkr	AD	0.0242416	0.00338415		0.0561611	0.0114592
ENSG00000233224_pdb	5kgf	AD	0.0244246	0.00341766		0.0547604	0.0110906
ENSG00000163468_pdb	6nr8	AD	0.0245	0.00345116		0.00176201	0.000435584
ENSG00000124275_pdb	2qtl	AD	0.0245372	0.00348467		0.0547966	0.0111241
ENSG00000153234_pdb	1ovl	AD	0.0249952	0.00351818		0.159822	0.0322332
ENSG00000164430_pdb	4km5	AD	0.0250956	0.00355168		0.290659	0.0600771
ENSG00000059804_pdb	4zw9	AD	0.0251274	0.00358519		0.0179858	0.00358519
ENSG00000132972_pdb	2eqk	AD	0.0251395	0.0036187		0.13257	0.0266711
ENSG00000166833_pdb	2yrn	AD	0.0251537	0.0036522		0.04206	0.00871168
ENSG00000118113_pdb	1bzs	AD	0.0251975	0.00368571		0.0870102	0.0176244
ENSG00000068976_pdb	1z8d	AD	0.0262632	0.00371922		0.337178	0.0700955
ENSG00000240972_pdb	1ca7	AD	0.0262808	0.00375272		0.198636	0.0402748
ENSG00000251357_pdb	1ca7	AD	0.0262808	0.00378623		0.198637	0.0403418
ENSG00000218537_pdb	1ca7	AD	0.0262808	0.00381974		0.198637	0.0403083
ENSG00000112116_pdb	5n92	AD	0.0263475	0.00385324		0.0476068	0.00998492
ENSG00000105976_pdb	7mo7	AD	0.026437	0.00388675		0.275791	0.0569275
ENSG00000214960_pdb	4cvh	AD	0.0265226	0.00392025		0.00387602	0.0010387
ENSG00000102547_pdb	3zhp	AD	0.026587	0.00395376		0.0332791	0.00693584
ENSG00000110887_pdb	2du8	AD	0.0266894	0.00398727		0.078245	0.0161166
ENSG00000165269_pdb	6kxw	AD	0.026955	0.00402077		0.437816	0.0916066
ENSG00000153707_pdb	6x3a	AD	0.0269565	0.00405428		0.109681	0.0226169
ENSG00000187736_pdb	3q4f	AD	0.0272332	0.00408779		0.205365	0.041615
ENSG00000213901_pdb	3q4f	AD	0.0272332	0.00412129		0.205365	0.0415815
ENSG00000161574_pdb	2q8t	AD	0.0275422	0.0041548		0.0373639	0.00787402
ENSG00000213494_pdb	2q8t	AD	0.0275422	0.00418831		0.0373622	0.00784051
ENSG00000266956_pdb	2q8t	AD	0.0275422	0.00422181		0.0373639	0.00790752
ENSG00000179526_pdb	5x0w	AD	0.0275617	0.00425532		0.181861	0.0366896
ENSG00000089723_pdb	4fjv	AD	0.0276186	0.00428883		0.360086	0.0749539
ENSG00000139505_pdb	2yf0	AD	0.0279809	0.00432233		0.208789	0.0425532
ENSG00000125733_pdb	2efk	AD	0.0280044	0.00435584		0.300332	0.0622215
ENSG00000026025_pdb	3uf1	AD	0.028492	0.00438934		0.0920642	0.0187301
ENSG00000123349_pdb	6nr8	AD	0.0286426	0.00442285		0.00975804	0.00190987
ENSG00000108684_pdb	6l6p	AD	0.0287835	0.00445636		0.0197224	0.00408779
ENSG00000136100_pdb	2zme	AD	0.0288336	0.00448986		0.0376205	0.00804155
ENSG00000109814_pdb	2q3e	AD	0.0289165	0.00452337		0.012832	0.00264701
ENSG00000111877_pdb	7dpd	AD	0.0289543	0.00455688		0.238381	0.0487519
ENSG00000175221_pdb	7emf	AD	0.0291971	0.00459038		0.455302	0.0944212
ENSG00000163634_pdb	7apk	AD	0.0293382	0.00462389		0.0473746	0.00991791
ENSG00000163632_pdb	7apk	AD	0.0293382	0.0046574		0.0473748	0.00995142
ENSG00000100784_pdb	3kn5	AD	0.0294456	0.0046909		0.19647	0.0399062
ENSG00000153406_pdb	2exx	AD	0.0298695	0.00472441		0.142429	0.0289496
ENSG00000126247_pdb	6qlb	AD	0.0301017	0.00475792		0.0553417	0.0112917
ENSG00000176402_pdb	6l3t	AD	0.0302553	0.00479142		0.0170637	0.00341766
ENSG00000170364_pdb	3k9k	AD	0.0303155	0.00482493		0.062215	0.0126319
ENSG00000144455_pdb	3k9k	AD	0.0303155	0.00485844		0.0622161	0.0126654
ENSG00000130726_pdb	2ro1	AD	0.0305776	0.00489194		0.0819492	0.0169208
ENSG00000073849_pdb	4js1	AD	0.0307938	0.00492545		0.108384	0.0224828
ENSG00000126934_pdb	1s9i	AD	0.0316319	0.00495895		0.0132739	0.00274753
ENSG00000106976_pdb	6dlu	AD	0.0317173	0.00499246		0.220919	0.0452672
ENSG00000115425_pdb	1yxm	AD	0.0321521	0.00502597		0.168964	0.033607
ENSG00000145675_pdb	1pbw	AD	0.0323145	0.00505947		0.134381	0.0273078
ENSG00000101082_pdb	4m4z	AD	0.0324016	0.00509298		0.145784	0.0294522
ENSG00000186868_pdb	6tjo	AD	0.032481	0.00512649		0.2594	0.0527056
ENSG00000115419_pdb	5uqe	AD	0.0325985	0.00515999		0.0775401	0.0159826
ENSG00000142677_pdb	3dgc	AD	0.0330742	0.0051935		0.106899	0.0221143
ENSG00000007908_pdb	4c16	AD	0.0331364	0.00522701		0.0516485	0.0106215
ENSG00000000460_pdb	4c16	AD	0.0331364	0.00526051		0.0516483	0.010588
ENSG00000260741_pdb	6bqn	AD	0.0332843	0.00529402		0.0856787	0.0175239
ENSG00000141458_pdb	6w5r	AD	0.0335347	0.00532753		0.0102112	0.00194337
ENSG00000004975_pdb	3cbx	AD	0.0335524	0.00536103		0.0183981	0.0036187
ENSG00000163961_pdb	5xis	AD	0.0335552	0.00539454		0.00641747	0.00130675
ENSG00000116198_pdb	5lph	AD	0.0337232	0.00542804		0.0430626	0.00897973
ENSG00000135047_pdb	6jd8	AD	0.0342147	0.00546155		0.00242387	0.000536103
ENSG00000117013_pdb	7byl	AD	0.0342758	0.00549506		0.688519	0.142168
ENSG00000135837_pdb	2coz	AD	0.0342813	0.00552856		0.708747	0.146256
ENSG00000067064_pdb	2i6k	AD	0.0343524	0.00556207		0.0102914	0.00197688
ENSG00000140463_pdb	6xt9	AD	0.0344818	0.00559558		0.240475	0.0491875
ENSG00000242485_pdb	3j7y	AD	0.0346649	0.00562908		0.170448	0.0339085
ENSG00000006634_pdb	6ya6	AD	0.0349749	0.00566259		0.124669	0.0252639
ENSG00000173210_pdb	1ujs	AD	0.0353803	0.0056961		0.205803	0.041749
ENSG00000124784_pdb	6zxf	AD	0.0358402	0.0057296		0.0530841	0.0109231
ENSG00000125657_pdb	6a3v	AD	0.0359613	0.00576311		0.0254192	0.00546155
ENSG00000197958_pdb	5a8l	AD	0.0360188	0.00579662		0.0173972	0.00348467
ENSG00000119917_pdb	6c6k	AD	0.0363204	0.00583012		0.0161171	0.00325013
ENSG00000095380_pdb	1wvo	AD	0.0363208	0.00586363		0.460216	0.0955604
ENSG00000076003_pdb	6xtx	AD	0.0365115	0.00589714		0.188217	0.0379293
ENSG00000143493_pdb	7cun	AD	0.0365764	0.00593064		0.0106613	0.00204389
ENSG00000143226_pdb	1fcg	AD	0.0369688	0.00596415		0.066577	0.0140727
ENSG00000104899_pdb	7l0j	AD	0.0370889	0.00599765		0.231364	0.0471101
ENSG00000111843_pdb	2los	AD	0.0371822	0.00603116		0.011984	0.00224493
ENSG00000121653_pdb	6fuz	AD	0.0372586	0.00606467		0.019577	0.00388675
ENSG00000188987_pdb	2cv5	AD	0.0376662	0.00609817		0.0871468	0.0176579
ENSG00000171855_pdb	1au1	AD	0.0377078	0.00613168		0.110298	0.0227844
ENSG00000152492_pdb	6lan	AD	0.0379011	0.00616519		0.0122931	0.00237896
ENSG00000196966_pdb	7mju	AD	0.0383105	0.00619869		0.130723	0.0264031
ENSG00000160223_pdb	6x4g	AD	0.0383354	0.0062322		0.0728478	0.0151784
ENSG00000173141_pdb	3j7y	AD	0.0385481	0.00626571		0.0140891	0.00278104
ENSG00000248647_pdb	1ujs	AD	0.0385567	0.00629921		0.232542	0.0474786
ENSG00000152207_pdb	6rz6	AD	0.0390544	0.00633272		0.0923097	0.0188306
ENSG00000151694_pdb	3lea	AD	0.0396284	0.00636623		0.084597	0.0173898
ENSG00000072135_pdb	2oc3	AD	0.0400132	0.00639973		0.0319261	0.00663428
ENSG00000250644_pdb	1lya	AD	0.0404629	0.00643324		0.0127304	0.00258
ENSG00000080293_pdb	6wzg	AD	0.0405367	0.00646674		0.17438	0.0349807
ENSG00000111229_pdb	6uhc	AD	0.0405569	0.00650025		0.0590146	0.0119953
ENSG00000108424_pdb	1qgk	AD	0.0407254	0.00653376		0.0220539	0.00479142
ENSG00000170099_pdb	2vdx	AD	0.0407472	0.00656726		0.066712	0.0141397
ENSG00000186074_pdb	2nms	AD	0.0408312	0.00660077		0.137247	0.0277098
ENSG00000172794_pdb	2nms	AD	0.0408312	0.00663428		0.137247	0.0277433
ENSG00000070010_pdb	2yuj	AD	0.0410629	0.00666778		0.417272	0.0877534
ENSG00000152422_pdb	6abo	AD	0.04112	0.00670129		0.349237	0.0727425
ENSG00000100479_pdb	5vbn	AD	0.0413492	0.0067348		0.0313188	0.00646674
ENSG00000144224_pdb	2kxj	AD	0.0413697	0.0067683		0.0092158	0.00174234
ENSG00000130762_pdb	1x6b	AD	0.041455	0.00680181		0.223895	0.0459038
ENSG00000164161_pdb	2wft	AD	0.0414564	0.00683532		0.00665192	0.00140727
ENSG00000188389_pdb	6jbt	AD	0.0415983	0.00686882		0.0636711	0.0131345
ENSG00000213366_pdb	1hna	AD	0.0419042	0.00690233		0.0212926	0.00462389
ENSG00000173486_pdb	2pbc	AD	0.0420599	0.00693584		0.0401419	0.00847713
ENSG00000101146_pdb	3mmy	AD	0.0425574	0.00696934		0.137511	0.0279109
ENSG00000115289_pdb	4hpm	AD	0.0428237	0.00700285		0.0518936	0.0106886
ENSG00000162739_pdb	2if7	AD	0.0429087	0.00703635		0.0809589	0.0168202
ENSG00000135919_pdb	4dy7	AD	0.042945	0.00706986		0.0451004	0.00951583
ENSG00000198183_pdb	4keg	AD	0.0430174	0.00710337		0.0260531	0.00559558
ENSG00000177156_pdb	1f05	AD	0.0432177	0.00713687		0.0705803	0.0147093
ENSG00000163131_pdb	2c0y	AD	0.043408	0.00717038		0.177827	0.0355838
ENSG00000129221_pdb	5u9a	AD	0.0434706	0.00720389		0.0911202	0.0184621
ENSG00000179921_pdb	7bw0	AD	0.0434892	0.00723739		0.204787	0.041481
ENSG00000072274_pdb	6d03	AD	0.0439293	0.0072709		0.363578	0.0756911
ENSG00000023318_pdb	5gu6	AD	0.0440494	0.00730441		0.022942	0.00495895
ENSG00000121691_pdb	1dgb	AD	0.044074	0.00733791		0.195878	0.0397722
ENSG00000173432_pdb	4ip8	AD	0.044366	0.00737142		0.00687518	0.00150779
ENSG00000178033_pdb	7d60	AD	0.0445493	0.00740493		0.162673	0.0325683
ENSG00000173626_pdb	7d60	AD	0.0445493	0.00743843		0.162672	0.0325348
ENSG00000104660_pdb	3tv0	AD	0.0451144	0.00747194		0.0820517	0.0169878
ENSG00000073111_pdb	6xtx	AD	0.0452069	0.00750544		0.102214	0.0210085
ENSG00000101203_pdb	2dkm	AD	0.0452664	0.00753895		0.196975	0.0400737
ENSG00000134817_pdb	5vbl	AD	0.0452758	0.00757246		0.0776143	0.0160161
ENSG00000179407_pdb	2dmx	AD	0.045392	0.00760596		0.189359	0.0383984
ENSG00000128342_pdb	1emr	AD	0.0458033	0.00763947		0.0410176	0.00854414
ENSG00000142684_pdb	1zr9	AD	0.0458465	0.00767298		0.0445162	0.00931479
ENSG00000236782_pdb	1zr9	AD	0.0458465	0.00770648		0.0445163	0.0093483
ENSG00000159720_pdb	6wlw	AD	0.0459365	0.00773999		0.207225	0.0420506
ENSG00000272896_pdb	2lor	AD	0.0463966	0.0077735		0.134014	0.0270732
ENSG00000244187_pdb	2lor	AD	0.0464206	0.007807		0.13399	0.0270397
ENSG00000117984_pdb	1lya	AD	0.0465665	0.00784051		0.0144856	0.00288155
ENSG00000154451_pdb	7e5a	AD	0.0467629	0.00787402		0.220694	0.0452337
ENSG00000237568_pdb	7e5a	AD	0.0467629	0.00790752		0.220694	0.0452002
ENSG00000165312_pdb	4bop	AD	0.0470965	0.00794103		0.174108	0.0348802
ENSG00000153976_pdb	1t8t	AD	0.0471601	0.00797454		0.0787371	0.0162171
ENSG00000268656_pdb	2fv7	AD	0.0472477	0.00800804		0.284456	0.0587033
ENSG00000138835_pdb	3fbk	AD	0.0472495	0.00804155		0.0886548	0.0178924
ENSG00000165379_pdb	5xnp	AD	0.0473674	0.00807505		0.111464	0.0228849
ENSG00000117592_pdb	1prx	AD	0.0482257	0.00810856		0.455889	0.0946222
ENSG00000113643_pdb	4r3z	AD	0.0483854	0.00814207		0.159216	0.0320657
ENSG00000072786_pdb	4aot	AD	0.0488124	0.00817557		0.10166	0.0208745
ENSG00000142082_pdb	3glr	AD	0.0489002	0.00820908		0.227455	0.0465405
ENSG00000080644_pdb	6pv7	AD	0.0490068	0.00824259		0.0804002	0.0165522
ENSG00000143641_pdb	2ffu	AD	0.0490632	0.00827609		0.0928387	0.0189647
ENSG00000107854_pdb	3twq	AD	0.0491238	0.0083096		0.181519	0.0365555
ENSG00000155636_pdb	7csz	AD	0.0491375	0.00834311		0.0848285	0.0174234
ENSG00000176490_pdb	2gf0	AD	0.0492463	0.00837661		0.0666804	0.0141062
ENSG00000164867_pdb	1m9j	AD	0.0495743	0.00841012		0.299906	0.0620875
ENSG00000142687_pdb	6ihb	AD	0.050037	0.00844363		0.339594	0.0703971
ENSG00000100299_pdb	1auk	AD	0.0506948	0.00847713		0.00282408	0.000670129
ENSG00000256116_pdb	5r50	AD	0.0507482	0.00851064		0.0757511	0.0157145
ENSG00000241360_pdb	2cfr	AD	0.0507625	0.00854414		0.34447	0.0713017
ENSG00000100092_pdb	2cfr	AD	0.0507625	0.00857765		0.34447	0.0712682
ENSG00000059378_pdb	2pqf	AD	0.0508085	0.00861116		0.143994	0.0292511
ENSG00000198399_pdb	3jzy	AD	0.051164	0.00864466		0.436675	0.0914056
ENSG00000160746_pdb	5oc9	AD	0.0513076	0.00867817		0.189948	0.0384989
ENSG00000176014_pdb	6nyy	AD	0.05134	0.00871168		0.0148946	0.00304909
ENSG00000258989_pdb	3txo	AD	0.0514143	0.00874518		0.316386	0.0652371
ENSG00000257621_pdb	6e5b	AD	0.0514728	0.00877869		0.0652218	0.0136371
ENSG00000255974_pdb	1z10	AD	0.0514882	0.0088122		0.0254003	0.00539454
ENSG00000268797_pdb	1z10	AD	0.0514882	0.0088457		0.0254009	0.00542804
ENSG00000185813_pdb	4xsv	AD	0.0516522	0.00887921		0.0204281	0.00438934
ENSG00000088926_pdb	2f83	AD	0.0518751	0.00891272		0.162739	0.0326018
ENSG00000136695_pdb	4p0k	AD	0.0518924	0.00894622		0.0454957	0.00961635
ENSG00000151292_pdb	4g16	AD	0.0519054	0.00897973		0.0223122	0.00485844
ENSG00000155313_pdb	6h4j	AD	0.0521281	0.00901324		0.23316	0.0476797
ENSG00000113384_pdb	3kn1	AD	0.0521945	0.00904674		0.0398362	0.00841012
ENSG00000071894_pdb	6uro	AD	0.0523711	0.00908025		0.296123	0.0613168
ENSG00000082515_pdb	3j7y	AD	0.0523864	0.00911375		0.0130141	0.00268052
ENSG00000007314_pdb	6agf	AD	0.0525364	0.00914726		0.0967093	0.0198693
ENSG00000120903_pdb	5fjv	AD	0.0534093	0.00918077		0.25591	0.0521025
ENSG00000115604_pdb	4kc3	AD	0.053834	0.00921427		0.0357889	0.00753895
ENSG00000115602_pdb	4kc3	AD	0.053834	0.00924778		0.0357891	0.00757246
ENSG00000054523_pdb	2eh0	AD	0.054201	0.00928129		0.0418181	0.00867817
ENSG00000143919_pdb	4pwy	AD	0.0542966	0.00931479		0.0878889	0.0178254
ENSG00000011028_pdb	5e4l	AD	0.0543943	0.0093483		0.0434594	0.00908025
ENSG00000164306_pdb	5l2x	AD	0.0544294	0.00938181		0.120395	0.0244262
ENSG00000166501_pdb	2i0e	AD	0.0545247	0.00941531		0.0301693	0.00633272
ENSG00000177239_pdb	1fmi	AD	0.0545276	0.00944882		0.237001	0.0484168
ENSG00000149781_pdb	7c3m	AD	0.0546442	0.00948233		0.853621	0.173664
ENSG00000112237_pdb	4f7n	AD	0.0548277	0.00951583		0.0283295	0.00603116
ENSG00000182934_pdb	6y32	AD	0.0548361	0.00954934		0.233153	0.0476462
ENSG00000157077_pdb	4bkw	AD	0.0548699	0.00958284		0.056115	0.0114257
ENSG00000074966_pdb	2dm0	AD	0.055017	0.00961635		0.299103	0.0619534
ENSG00000021574_pdb	6pek	AD	0.0551274	0.00964986		0.046246	0.00975038
ENSG00000169429_pdb	1icw	AD	0.0552224	0.00968336		0.211691	0.0432903
ENSG00000099834_pdb	6oae	AD	0.0553878	0.00971687		0.129545	0.026135
ENSG00000241973_pdb	1jmo	AD	0.0557116	0.00975038		0.0525975	0.0108226
ENSG00000099937_pdb	1jmo	AD	0.0557116	0.00978388		0.0525976	0.0108561
ENSG00000184916_pdb	5mw5	AD	0.0561121	0.00981739		0.42736	0.0895292
ENSG00000213465_pdb	3doe	AD	0.0562568	0.0098509		0.477316	0.0995477
ENSG00000273003_pdb	3doe	AD	0.0562568	0.0098844		0.477316	0.0995142
ENSG00000088682_pdb	6awl	AD	0.0563967	0.00991791		0.00293972	0.000703635
ENSG00000130725_pdb	2nvu	AD	0.0564014	0.00995142		0.405996	0.085609
ENSG00000058600_pdb	7ae1	AD	0.0569049	0.00998492		0.00345982	0.000871168
ENSG00000112655_pdb	6vg3	AD	0.0570101	0.0100184		0.138326	0.0280449
ENSG00000141485_pdb	7jsj	AD	0.0572644	0.0100519		0.144457	0.0292846
ENSG00000162733_pdb	2wuh	AD	0.0576281	0.0100854		0.0982638	0.0201709
ENSG00000115963_pdb	1m7b	AD	0.0576474	0.0101189		0.16794	0.0334059
ENSG00000174564_pdb	4doh	AD	0.0577852	0.0101525		0.0328364	0.0067683
ENSG00000066117_pdb	6lth	AD	0.0578012	0.010186		0.105676	0.0217122
ENSG00000161800_pdb	5c2k	AD	0.0581309	0.0102195		0.0265721	0.0056961
ENSG00000224970_pdb	7k4a	AD	0.0581416	0.010253		0.578466	0.120623
ENSG00000180667_pdb	4boq	AD	0.0581768	0.0102865		0.0409878	0.00851064
ENSG00000137714_pdb	3p1m	AD	0.0581976	0.01032		0.0804971	0.0166192
ENSG00000119333_pdb	6rlb	AD	0.0583623	0.0103535		0.00933398	0.00180935
ENSG00000170248_pdb	2oev	AD	0.0585871	0.010387		0.188046	0.0378623
ENSG00000167302_pdb	5wf9	AD	0.0587393	0.0104205		0.137436	0.0278439
ENSG00000131944_pdb	4bxo	AD	0.0588102	0.010454		0.064217	0.013235
ENSG00000204843_pdb	2coy	AD	0.0589302	0.0104875		0.362109	0.0753895
ENSG00000006071_pdb	6c3p	AD	0.0589512	0.010521		0.0295218	0.00616519
ENSG00000111537_pdb	1eku	AD	0.0591389	0.0105545		0.0800131	0.0164852
ENSG00000255733_pdb	1eku	AD	0.0591389	0.010588		0.0800135	0.0165187
ENSG00000174827_pdb	2eei	AD	0.0591954	0.0106215		0.0423546	0.00891272
ENSG00000005339_pdb	5i8b	AD	0.0598704	0.0106551		0.176109	0.0353493
ENSG00000180611_pdb	7lt1	AD	0.0600257	0.0106886		0.279043	0.0576981
ENSG00000246366_pdb	4ad9	AD	0.060216	0.0107221		0.010638	0.00201039
ENSG00000120438_pdb	6nr8	AD	0.0602571	0.0107556		0.439955	0.0917407
ENSG00000107104_pdb	5ybj	AD	0.0603167	0.0107891		0.00459971	0.00117273
ENSG00000174099_pdb	6qa0	AD	0.0614487	0.0108226		0.0124287	0.00247948
ENSG00000162378_pdb	7ep0	AD	0.0617156	0.0108561		0.13392	0.0270062
ENSG00000121879_pdb	5ukj	AD	0.0617387	0.0108896		0.049099	0.0101525
ENSG00000095397_pdb	6kz1	AD	0.0617482	0.0109231		0.0332546	0.00690233
ENSG00000214102_pdb	5vdk	AD	0.061826	0.0109566		0.073143	0.0152119
ENSG00000228775_pdb	5vdk	AD	0.061826	0.0109901		0.0731432	0.0152454
ENSG00000165660_pdb	6h3c	AD	0.0618818	0.0110236		0.206979	0.0419501
ENSG00000119013_pdb	5xtc	AD	0.0621196	0.0110571		0.0602613	0.0122969
ENSG00000174238_pdb	1uw5	AD	0.0621308	0.0110906		0.435353	0.0910705
ENSG00000185652_pdb	1bnd	AD	0.0621984	0.0111241		0.0982007	0.0201039
ENSG00000132664_pdb	7a6h	AD	0.0622629	0.0111576		0.0576732	0.0118278
ENSG00000004779_pdb	2dnw	AD	0.0622761	0.0111912		0.020883	0.00448986
ENSG00000163872_pdb	5iql	AD	0.0625108	0.0112247		0.112719	0.0230189
ENSG00000105810_pdb	1blx	AD	0.0625858	0.0112582		0.152508	0.0307254
ENSG00000155760_pdb	7evw	AD	0.0630585	0.0112917		0.174579	0.0350477
ENSG00000257002_pdb	6oij	AD	0.0642883	0.0113252		0.427471	0.0895962
ENSG00000168539_pdb	6oij	AD	0.0642883	0.0113587		0.42747	0.0895627
ENSG00000072832_pdb	4b3z	AD	0.0644812	0.0113922		0.0240543	0.00522701
ENSG00000051341_pdb	5a9j	AD	0.0653829	0.0114257		0.37897	0.0794438
ENSG00000102678_pdb	1g82	AD	0.0658943	0.0114592		0.159209	0.0320322
ENSG00000112110_pdb	3j7y	AD	0.0666059	0.0114927		0.130697	0.0263696
ENSG00000198610_pdb	2fvl	AD	0.0668228	0.0115262		0.254992	0.051734
ENSG00000138621_pdb	1qzu	AD	0.0668568	0.0115597		0.0383651	0.00827609
ENSG00000166206_pdb	5o8f	AD	0.0671526	0.0115932		0.0902021	0.0182275
ENSG00000232284_pdb	7drt	AD	0.0671775	0.0116267		0.1374	0.0278104
ENSG00000258818_pdb	4b36	AD	0.0672386	0.0116602		0.182678	0.0370916
ENSG00000258451_pdb	4b36	AD	0.0672386	0.0116938		0.182679	0.0371587
ENSG00000259171_pdb	4b36	AD	0.0672386	0.0117273		0.182677	0.0370581
ENSG00000214274_pdb	4b36	AD	0.0672386	0.0117608		0.182678	0.0371251
ENSG00000188611_pdb	4wgk	AD	0.0673201	0.0117943		0.151463	0.0303904
ENSG00000151093_pdb	2c9h	AD	0.0674155	0.0118278		0.106989	0.0221813
ENSG00000129472_pdb	2a5j	AD	0.0675521	0.0118613		0.252867	0.0514324
ENSG00000149658_pdb	4rci	AD	0.0676899	0.0118948		0.582306	0.12136
ENSG00000176444_pdb	3nr9	AD	0.0678105	0.0119283		0.0234572	0.00505947
ENSG00000140650_pdb	2amy	AD	0.0679345	0.0119618		0.154614	0.0311945
ENSG00000145692_pdb	1lt8	AD	0.0680444	0.0119953		0.151802	0.0305244
ENSG00000112511_pdb	5xfn	AD	0.0680552	0.0120288		0.0341595	0.00710337
ENSG00000148660_pdb	2ux0	AD	0.0680833	0.0120623		0.167018	0.0332049
ENSG00000134013_pdb	5ze3	AD	0.0681065	0.0120958		0.0333347	0.00696934
ENSG00000165105_pdb	2p5s	AD	0.0684115	0.0121293		0.082518	0.0170213
ENSG00000237640_pdb	6l3t	AD	0.0684845	0.0121628		0.0480976	0.0100854
ENSG00000158477_pdb	1onq	AD	0.0684905	0.0121963		0.163672	0.0328363
ENSG00000143256_pdb	6nr8	AD	0.0691882	0.0122299		0.252572	0.0513654
ENSG00000118997_pdb	6rza	AD	0.0694108	0.0122634		0.147808	0.0299213
ENSG00000135776_pdb	3zdq	AD	0.0696413	0.0122969		0.228937	0.0467415
ENSG00000176946_pdb	3ia8	AD	0.0696758	0.0123304		0.0921216	0.0187971
ENSG00000176153_pdb	2he3	AD	0.0700065	0.0123639		0.665027	0.137209
ENSG00000258289_pdb	2he3	AD	0.0700065	0.0123974		0.665033	0.137242
ENSG00000177628_pdb	1ogs	AD	0.0700419	0.0124309		0.601323	0.124879
ENSG00000081087_pdb	7bxu	AD	0.0701492	0.0124644		0.0701273	0.0145753
ENSG00000139921_pdb	1x5e	AD	0.0702099	0.0124979		0.113233	0.023153
ENSG00000198478_pdb	2ct6	AD	0.0705165	0.0125314		0.0217256	0.0046909
ENSG00000154269_pdb	6c01	AD	0.070606	0.0125649		0.146029	0.0294857
ENSG00000166166_pdb	5ccx	AD	0.0706093	0.0125984		0.234581	0.0478472
ENSG00000153233_pdb	2a8b	AD	0.0707093	0.0126319		0.206021	0.0417825
ENSG00000230055_pdb	6avj	AD	0.0716912	0.0126654		0.234249	0.0477802
ENSG00000058056_pdb	2lbc	AD	0.0717938	0.0126989		0.0382395	0.00820908
ENSG00000139780_pdb	4mtl	AD	0.0721055	0.0127325		0.10537	0.0216117
ENSG00000167315_pdb	4c2j	AD	0.0721385	0.012766		0.322413	0.0665438
ENSG00000189184_pdb	6vfr	AD	0.0721577	0.0127995		0.194864	0.0395041
ENSG00000137486_pdb	6pwc	AD	0.0724216	0.012833		0.463838	0.0964316
ENSG00000148400_pdb	1yyh	AD	0.0724613	0.0128665		0.0249345	0.00532753
ENSG00000136875_pdb	5o9z	AD	0.0724755	0.0129		0.287572	0.0593734
ENSG00000118972_pdb	5w21	AD	0.0725297	0.0129335		0.0602926	0.0123304
ENSG00000155666_pdb	4aap	AD	0.0726586	0.012967		0.0341693	0.00713687
ENSG00000176148_pdb	6uro	AD	0.0726646	0.0130005		0.183775	0.0373262
ENSG00000176102_pdb	6uro	AD	0.0726646	0.013034		0.183777	0.0373597
ENSG00000160752_pdb	4dem	AD	0.072704	0.0130675		0.0144533	0.00284805
ENSG00000164078_pdb	4qt8	AD	0.0728908	0.013101		0.0955722	0.0196348
ENSG00000108826_pdb	3j7y	AD	0.0732927	0.0131345		0.0232747	0.00499246
ENSG00000036054_pdb	6jl7	AD	0.0739069	0.013168		0.180356	0.0363545
ENSG00000140459_pdb	3n9y	AD	0.074269	0.0132015		0.0493098	0.0102195
ENSG00000179262_pdb	1oqy	AD	0.0742712	0.013235		0.014593	0.00298207
ENSG00000124571_pdb	5yu7	AD	0.0744408	0.0132686		0.0453542	0.00958284
ENSG00000168734_pdb	3iar	AD	0.0744654	0.0133021		0.142331	0.0289161
ENSG00000164082_pdb	7mts	AD	0.0746718	0.0133356		0.141149	0.0286145
ENSG00000141385_pdb	6nyy	AD	0.0748497	0.0133691		0.0161354	0.00328363
ENSG00000086548_pdb	4whc	AD	0.0751987	0.0134026		0.140595	0.0285475
ENSG00000133661_pdb	2ric	AD	0.0752278	0.0134361		0.209545	0.0427877
ENSG00000163945_pdb	5xv8	AD	0.0755846	0.0134696		0.212652	0.0435249
ENSG00000009765_pdb	4ttc	AD	0.0755936	0.0135031		0.290186	0.0599765
ENSG00000047410_pdb	5to5	AD	0.0756018	0.0135366		0.0555557	0.0113587
ENSG00000087460_pdb	6xox	AD	0.0756596	0.0135701		0.182818	0.0371922
ENSG00000164128_pdb	5zbq	AD	0.0756605	0.0136036		0.202522	0.0411459
ENSG00000198625_pdb	2cr8	AD	0.0760327	0.0136371		0.111863	0.0229519
ENSG00000091039_pdb	1v88	AD	0.0761917	0.0136706		0.15958	0.0321662
ENSG00000008311_pdb	5o1p	AD	0.0762738	0.0137041		0.0706657	0.0147763
ENSG00000164211_pdb	6l1m	AD	0.0764854	0.0137376		0.175834	0.0352823
ENSG00000165125_pdb	6e2f	AD	0.0769488	0.0137712		0.642884	0.133322
ENSG00000015520_pdb	3qnt	AD	0.0770754	0.0138047		0.0521569	0.0107221
ENSG00000157106_pdb	6l53	AD	0.077258	0.0138382		0.619901	0.128464
ENSG00000100335_pdb	4nxt	AD	0.077476	0.0138717		0.0170389	0.00338415
ENSG00000118197_pdb	2yqp	AD	0.0776444	0.0139052		0.19408	0.0393366
ENSG00000000971_pdb	1haq	AD	0.0777828	0.0139387		0.25867	0.0526051
ENSG00000102781_pdb	6b5c	AD	0.0781149	0.0139722		0.0648783	0.0136036
ENSG00000266953_pdb	1iat	AD	0.0781378	0.0140057		0.120314	0.0243592
ENSG00000112309_pdb	2d0j	AD	0.0782219	0.0140392		0.181399	0.0364885
ENSG00000184678_pdb	4nft	AD	0.078244	0.0140727		0.208492	0.0423186
ENSG00000130305_pdb	2b9e	AD	0.0786418	0.0141062		0.0163124	0.00331714
ENSG00000224713_pdb	2rgn	AD	0.0788277	0.0141397		0.080623	0.0166862
ENSG00000240771_pdb	2rgn	AD	0.0788277	0.0141732		0.080623	0.0166527
ENSG00000110429_pdb	5hdw	AD	0.0790622	0.0142067		0.13382	0.0269392
ENSG00000177272_pdb	7ej1	AD	0.0791407	0.0142402		0.0151881	0.0031161
ENSG00000074800_pdb	2psn	AD	0.0791539	0.0142737		0.092901	0.0189982
ENSG00000137154_pdb	5flx	AD	0.0792659	0.0143073		0.128213	0.0258335
ENSG00000143248_pdb	2crp	AD	0.0792876	0.0143408		0.330326	0.0683867
ENSG00000196517_pdb	6zbv	AD	0.0793278	0.0143743		0.106927	0.0221478
ENSG00000117450_pdb	2rii	AD	0.0793968	0.0144078		0.249282	0.0508293
ENSG00000133816_pdb	2e9k	AD	0.079602	0.0144413		0.0300667	0.00626571
ENSG00000161980_pdb	7a6h	AD	0.0798573	0.0144748		0.781707	0.159591
ENSG00000162384_pdb	5zlq	AD	0.0803326	0.0145083		0.0283822	0.00606467
ENSG00000259040_pdb	3wge	AD	0.0803856	0.0145418		0.517965	0.107924
ENSG00000239264_pdb	3wge	AD	0.0803856	0.0145753		0.517963	0.107891
ENSG00000123124_pdb	6j1x	AD	0.0804467	0.0146088		0.302949	0.0626571
ENSG00000140876_pdb	5t3p	AD	0.0805074	0.0146423		0.179867	0.0362875
ENSG00000227432_pdb	7d72	AD	0.0810291	0.0146758		0.505358	0.105244
ENSG00000144591_pdb	7d72	AD	0.0810291	0.0147093		0.505362	0.105277
ENSG00000137656_pdb	7dvq	AD	0.0810429	0.0147428		0.172948	0.0345787
ENSG00000128683_pdb	2okj	AD	0.0811992	0.0147763		0.0267338	0.0057296
ENSG00000111275_pdb	1cw3	AD	0.0812146	0.0148099		0.179768	0.036254
ENSG00000141298_pdb	2nt2	AD	0.081384	0.0148434		0.0981458	0.0200704
ENSG00000164647_pdb	6y9b	AD	0.0816451	0.0148769		0.0145652	0.00294857
ENSG00000171522_pdb	7d7m	AD	0.0820536	0.0149104		0.561978	0.116837
ENSG00000081721_pdb	4jnb	AD	0.0820948	0.0149439		0.666745	0.137745
ENSG00000107186_pdb	2o2t	AD	0.0822334	0.0149774		0.208626	0.0424527
ENSG00000176383_pdb	6jx6	AD	0.0823323	0.0150109		0.314322	0.0648685
ENSG00000257545_pdb	7a6h	AD	0.0823396	0.0150444		0.847697	0.172592
ENSG00000109536_pdb	6zym	AD	0.0824057	0.0150779		0.192607	0.039035
ENSG00000244509_pdb	3vm8	AD	0.0827707	0.0151114		0.0653893	0.0137376
ENSG00000243811_pdb	3vm8	AD	0.0827707	0.0151449		0.0653881	0.0137041
ENSG00000152642_pdb	2pla	AD	0.0828473	0.0151784		0.0546283	0.0110571
ENSG00000171759_pdb	6hyc	AD	0.083122	0.0152119		0.363985	0.0757916
ENSG00000138685_pdb	3h95	AD	0.0833511	0.0152454		0.099571	0.0203719
ENSG00000163939_pdb	6oxb	AD	0.0834391	0.0152789		0.0804142	0.0165857
ENSG00000240505_pdb	1xu1	AD	0.0835482	0.0153124		0.344973	0.0714358
ENSG00000138030_pdb	2hlz	AD	0.08392	0.015346		0.0781676	0.0160831
ENSG00000266962_pdb	1a27	AD	0.0839323	0.0153795		0.0646009	0.0133691
ENSG00000125384_pdb	7cx2	AD	0.0840795	0.015413		0.00602698	0.00127325
ENSG00000111859_pdb	2l81	AD	0.0849725	0.0154465		0.0790649	0.0163176
ENSG00000247925_pdb	2l81	AD	0.0849725	0.01548		0.0790649	0.0162841
ENSG00000162891_pdb	4doh	AD	0.0849818	0.0155135		0.0829189	0.0171218
ENSG00000113578_pdb	1ry7	AD	0.0851464	0.015547		0.0920108	0.0186296
ENSG00000231185_pdb	1ry7	AD	0.0851464	0.0155805		0.0920111	0.0186631
ENSG00000244462_pdb	2cpy	AD	0.0851962	0.015614		0.332607	0.0688893
ENSG00000214078_pdb	2cpy	AD	0.0851962	0.0156475		0.332606	0.0688558
ENSG00000272897_pdb	2cpy	AD	0.0851962	0.015681		0.332607	0.0689228
ENSG00000154342_pdb	7drt	AD	0.0857122	0.0157145		0.124345	0.0250963
ENSG00000114166_pdb	1cm0	AD	0.0857592	0.015748		0.121885	0.0247613
ENSG00000198252_pdb	2r0b	AD	0.0860028	0.0157815		0.0417431	0.00864466
ENSG00000130177_pdb	4ui9	AD	0.0864887	0.015815		0.398632	0.0836991
ENSG00000092969_pdb	1tfg	AD	0.0864964	0.0158486		0.0323621	0.00670129
ENSG00000167004_pdb	3f8u	AD	0.0879612	0.0158821		0.361289	0.075222
ENSG00000197099_pdb	4ecb	AD	0.0883077	0.0159156		0.653055	0.135031
ENSG00000113889_pdb	4ecb	AD	0.0883077	0.0159491		0.653054	0.134997
ENSG00000049618_pdb	2cxy	AD	0.0885119	0.0159826		0.208624	0.0424192
ENSG00000181019_pdb	1d4a	AD	0.0886448	0.0160161		0.783991	0.160127
ENSG00000135541_pdb	4esr	AD	0.0887598	0.0160496		0.124442	0.0251969
ENSG00000105388_pdb	10000000	AD	0.0891046	0.0160831		0.211065	0.0430558
ENSG00000267881_pdb	10000000	AD	0.0891046	0.0161166		0.211064	0.0430223
ENSG00000178685_pdb	2dhx	AD	0.0891494	0.0161501		0.226733	0.0463729
ENSG00000196411_pdb	4aw5	AD	0.0893624	0.0161836		0.0155026	0.00314961
ENSG00000184545_pdb	4jmk	AD	0.0898929	0.0162171		0.0625947	0.0127995
ENSG00000108375_pdb	4kng	AD	0.089924	0.0162506		0.255711	0.051935
ENSG00000265148_pdb	4kng	AD	0.089924	0.0162841		0.255712	0.0519685
ENSG00000142675_pdb	1wwv	AD	0.0899778	0.0163176		0.755237	0.155034
ENSG00000136928_pdb	6uo8	AD	0.090306	0.0163511		0.309493	0.0640308
ENSG00000170340_pdb	6wmo	AD	0.0907847	0.0163847		0.285121	0.0588373
ENSG00000147465_pdb	5oma	AD	0.0909272	0.0164182		0.241765	0.0494555
ENSG00000197381_pdb	6vff	AD	0.0912382	0.0164517		0.0318074	0.00660077
ENSG00000257767_pdb	1cw3	AD	0.0912699	0.0164852		0.452995	0.0943207
ENSG00000154719_pdb	5ool	AD	0.0913749	0.0165187		0.212733	0.0435919
ENSG00000162231_pdb	4wyk	AD	0.0914176	0.0165522		0.137392	0.0277768
ENSG00000179750_pdb	2nbq	AD	0.0914248	0.0165857		0.147154	0.0297537
ENSG00000179639_pdb	1f2q	AD	0.0914818	0.0166192		0.346124	0.0718043
ENSG00000132703_pdb	1gyk	AD	0.0915814	0.0166527		0.074424	0.0154465
ENSG00000023191_pdb	1a4y	AD	0.0916127	0.0166862		0.148094	0.0299548
ENSG00000100095_pdb	2yra	AD	0.091616	0.0167197		0.0439274	0.00918077
ENSG00000102900_pdb	5ijn	AD	0.0919239	0.0167532		0.197955	0.0401742
ENSG00000135144_pdb	6y5n	AD	0.0919958	0.0167867		0.0202552	0.00425532
ENSG00000139083_pdb	7n2b	AD	0.0920121	0.0168202		0.0595415	0.0121628
ENSG00000196814_pdb	3tow	AD	0.092083	0.0168537		0.176648	0.0354498
ENSG00000197299_pdb	4o3m	AD	0.0926128	0.0168873		0.136712	0.0275758
ENSG00000131686_pdb	3fe4	AD	0.092796	0.0169208		0.209761	0.0428212
ENSG00000113441_pdb	4p8q	AD	0.0928255	0.0169543		0.154247	0.0311275
ENSG00000097046_pdb	4f9a	AD	0.0929422	0.0169878		0.174979	0.0351483
ENSG00000239282_pdb	5gt7	AD	0.0929639	0.0170213		0.0259429	0.00552856
ENSG00000248751_pdb	5gt7	AD	0.0929639	0.0170548		0.0259429	0.00549506
ENSG00000075151_pdb	1hu3	AD	0.0930061	0.0170883		0.153207	0.0308594
ENSG00000082482_pdb	4twk	AD	0.0931019	0.0171218		0.226072	0.0462389
ENSG00000109736_pdb	6s4m	AD	0.0932427	0.0171553		0.236456	0.0482828
ENSG00000124635_pdb	2rvq	AD	0.0933201	0.0171888		0.343288	0.0709332
ENSG00000141034_pdb	7nsc	AD	0.0933515	0.0172223		0.120422	0.0244597
ENSG00000095752_pdb	6o4o	AD	0.0935761	0.0172558		0.0839352	0.0172558
ENSG00000188827_pdb	4uyi	AD	0.0937571	0.0172893		0.532104	0.111208
ENSG00000147687_pdb	2xio	AD	0.0939291	0.0173228		0.0471452	0.0098844
ENSG00000134962_pdb	5van	AD	0.0939781	0.0173563		0.0726465	0.0151449
ENSG00000130202_pdb	3r0n	AD	0.0939797	0.0173898		0.0144967	0.00291506
ENSG00000259972_pdb	5gjq	AD	0.0942165	0.0174234		0.128633	0.0259005
ENSG00000136603_pdb	3eq5	AD	0.0943046	0.0174569		0.0223219	0.00489194
ENSG00000118503_pdb	2vfj	AD	0.0943214	0.0174904		0.389911	0.0817557
ENSG00000122733_pdb	1wil	AD	0.0943217	0.0175239		0.065404	0.0137712
ENSG00000171766_pdb	1jdw	AD	0.0943673	0.0175574		0.636766	0.131848
ENSG00000161920_pdb	7emf	AD	0.0945387	0.0175909		0.339753	0.0704306
ENSG00000139631_pdb	2jis	AD	0.094961	0.0176244		0.0601782	0.0122634
ENSG00000162066_pdb	7nuu	AD	0.095414	0.0176579		0.499271	0.104038
ENSG00000107897_pdb	3flv	AD	0.0954593	0.0176914		0.0374459	0.00794103
ENSG00000256825_pdb	2el4	AD	0.0955636	0.0177249		0.704125	0.145451
ENSG00000090612_pdb	2el4	AD	0.0955636	0.0177584		0.704126	0.145485
ENSG00000132142_pdb	6g2d	AD	0.0957579	0.0177919		0.317018	0.0653041
ENSG00000267984_pdb	1efv	AD	0.0959775	0.0178254		0.204406	0.041414
ENSG00000078304_pdb	2npp	AD	0.0959827	0.0178589		0.174902	0.0350813
ENSG00000124126_pdb	6pcv	AD	0.0960443	0.0178924		0.155135	0.0312615
ENSG00000205923_pdb	7nuu	AD	0.0962413	0.017926		0.51038	0.106282
ENSG00000104852_pdb	4pkd	AD	0.0963555	0.0179595		0.0636039	0.0130675
ENSG00000117448_pdb	2alr	AD	0.0964823	0.017993		0.0820019	0.0169543
ENSG00000196083_pdb	3o4o	AD	0.0964969	0.0180265		0.33492	0.0695259
ENSG00000248356_pdb	2www	AD	0.0968153	0.01806		0.299274	0.0620204
ENSG00000131652_pdb	7apk	AD	0.0970933	0.0180935		0.0173537	0.00345116
ENSG00000196139_pdb	2fgb	AD	0.0972166	0.018127		0.0735688	0.0153124
ENSG00000127554_pdb	3tk0	AD	0.0974381	0.0181605		0.335246	0.0696599
ENSG00000104299_pdb	7bfq	AD	0.0975886	0.018194		0.272291	0.0561903
ENSG00000107951_pdb	3pq1	AD	0.0978132	0.0182275		0.219121	0.0449992
ENSG00000172572_pdb	7kwe	AD	0.0980446	0.018261		0.0746665	0.0155135
ENSG00000140563_pdb	2ep6	AD	0.0985262	0.0182945		0.184162	0.0373932
ENSG00000133789_pdb	2dn6	AD	0.0988849	0.018328		0.177	0.0354833
ENSG00000056586_pdb	4z30	AD	0.0989228	0.0183615		0.856429	0.174267
ENSG00000112651_pdb	7of0	AD	0.0990516	0.018395		0.127537	0.0256994
ENSG00000137171_pdb	7of0	AD	0.0990516	0.0184285		0.127538	0.025733
ENSG00000104687_pdb	1bwc	AD	0.0993046	0.0184621		0.237493	0.0486179
ENSG00000099917_pdb	7emf	AD	0.0993676	0.0184956		0.239016	0.0489194
ENSG00000160801_pdb	6fj3	AD	0.0993977	0.0185291		0.245706	0.0500921
ENSG00000135766_pdb	3hqr	AD	0.0998684	0.0185626		0.0996365	0.0204389
ENSG00000128951_pdb	2hqu	AD	0.0999278	0.0185961		0.0439316	0.00921427
ENSG00000122390_pdb	5hgz	AD	0.100003	0.0186296		0.262347	0.0533088
ENSG00000262621_pdb	5hgz	AD	0.100003	0.0186631		0.262348	0.0533423
ENSG00000115307_pdb	2ekf	AD	0.100105	0.0186966		0.103394	0.0213771
ENSG00000148948_pdb	3zyj	AD	0.100401	0.0187301		0.142661	0.0290166
ENSG00000006114_pdb	2mx7	AD	0.100484	0.0187636		0.461382	0.0959625
ENSG00000130402_pdb	1wlx	AD	0.100516	0.0187971		0.165899	0.0329703
ENSG00000176884_pdb	6ira	AD	0.100525	0.0188306		0.0306784	0.00643324
ENSG00000167971_pdb	3sen	AD	0.100627	0.0188641		0.0591442	0.0120288
ENSG00000140553_pdb	2dba	AD	0.10069	0.0188976		0.179541	0.036187
ENSG00000136143_pdb	6g4q	AD	0.101083	0.0189311		0.207149	0.0419836
ENSG00000011347_pdb	2d8k	AD	0.10119	0.0189647		0.131912	0.0265036
ENSG00000125124_pdb	4nhx	AD	0.101478	0.0189982		0.313362	0.0647345
ENSG00000138663_pdb	4d10	AD	0.101844	0.0190317		0.163821	0.0328698
ENSG00000010295_pdb	6abo	AD	0.101921	0.0190652		0.316378	0.0652036
ENSG00000257878_pdb	1gw6	AD	0.102472	0.0190987		0.263174	0.0535098
ENSG00000172939_pdb	2vwi	AD	0.102632	0.0191322		0.145148	0.0293517
ENSG00000188784_pdb	5wzm	AD	0.102904	0.0191657		0.0195942	0.00392025
ENSG00000005961_pdb	3fcs	AD	0.10292	0.0191992		0.0953116	0.0195678
ENSG00000113569_pdb	5a9q	AD	0.103413	0.0192327		0.0927474	0.0189311
ENSG00000168090_pdb	4d10	AD	0.104029	0.0192662		0.242378	0.0495225
ENSG00000185238_pdb	2fyt	AD	0.104071	0.0192997		0.0375995	0.00800804
ENSG00000127884_pdb	2hw5	AD	0.104241	0.0193332		0.163374	0.0327693
ENSG00000125246_pdb	5vxc	AD	0.104737	0.0193667		0.169776	0.0338415
ENSG00000092531_pdb	3zus	AD	0.104941	0.0194002		0.0550308	0.0112247
ENSG00000112041_pdb	2fim	AD	0.104942	0.0194337		0.118131	0.0240576
ENSG00000153162_pdb	6omo	AD	0.105092	0.0194672		0.495407	0.103468
ENSG00000138172_pdb	6uiv	AD	0.105222	0.0195008		0.107744	0.0223153
ENSG00000164190_pdb	6wg3	AD	0.105305	0.0195343		0.205295	0.041548
ENSG00000168959_pdb	6ffi	AD	0.105359	0.0195678		0.841484	0.171553
ENSG00000117614_pdb	6icz	AD	0.105393	0.0196013		0.315594	0.065103
ENSG00000130764_pdb	6zxd	AD	0.105476	0.0196348		0.17889	0.0359859
ENSG00000198793_pdb	5zcs	AD	0.105609	0.0196683		0.730848	0.150511
ENSG00000156469_pdb	3m66	AD	0.106171	0.0197018		0.194983	0.0395711
ENSG00000104129_pdb	2d9o	AD	0.10675	0.0197353		0.629543	0.130273
ENSG00000107165_pdb	5m8l	AD	0.106885	0.0197688		0.266771	0.054649
ENSG00000128594_pdb	3zyi	AD	0.107095	0.0198023		0.168845	0.0335064
ENSG00000188375_pdb	4z5t	AD	0.107296	0.0198358		0.440681	0.0918747
ENSG00000173366_pdb	2w0i	AD	0.107515	0.0198693		0.152193	0.0306584
ENSG00000100599_pdb	4wci	AD	0.10767	0.0199028		0.313716	0.064768
ENSG00000111640_pdb	1u8f	AD	0.107691	0.0199363		0.539315	0.113017
ENSG00000154839_pdb	4c9y	AD	0.108427	0.0199698		0.053549	0.0109566
ENSG00000106636_pdb	6j7f	AD	0.108548	0.0200034		0.121124	0.0245602
ENSG00000105993_pdb	6u3r	AD	0.108911	0.0200369		0.128552	0.025867
ENSG00000162438_pdb	4h4f	AD	0.10906	0.0200704		0.15227	0.0306919
ENSG00000111581_pdb	5a9q	AD	0.109092	0.0201039		0.120784	0.0244932
ENSG00000136943_pdb	1fh0	AD	0.109276	0.0201374		0.966087	0.193969
ENSG00000164400_pdb	1csg	AD	0.109624	0.0201709		0.0584041	0.0118948
ENSG00000113758_pdb	5y1z	AD	0.109862	0.0202044		0.011209	0.00217792
ENSG00000104529_pdb	2n51	AD	0.109889	0.0202379		0.188682	0.0381303
ENSG00000146701_pdb	4wle	AD	0.109939	0.0202714		0.0380878	0.00817557
ENSG00000168438_pdb	6icz	AD	0.110094	0.0203049		0.456723	0.0947227
ENSG00000142669_pdb	1sj6	AD	0.110346	0.0203384		0.297371	0.0615513
ENSG00000105248_pdb	7a5p	AD	0.110668	0.0203719		0.0566426	0.0115932
ENSG00000182156_pdb	5tcd	AD	0.110756	0.0204054		0.134385	0.0273413
ENSG00000096070_pdb	3pfs	AD	0.110846	0.0204389		0.25818	0.0525046
ENSG00000125618_pdb	2k27	AD	0.11176	0.0204724		0.311034	0.0643324
ENSG00000108786_pdb	1a27	AD	0.112016	0.0205059		0.0562229	0.0115262
ENSG00000070882_pdb	7cyz	AD	0.112198	0.0205395		0.170933	0.0339755
ENSG00000164111_pdb	1anw	AD	0.112448	0.020573		0.0658739	0.0139387
ENSG00000152894_pdb	2c7s	AD	0.112457	0.0206065		0.0276093	0.00583012
ENSG00000002016_pdb	1h2i	AD	0.112458	0.02064		0.366718	0.0765957
ENSG00000164362_pdb	7bg9	AD	0.113034	0.0206735		0.0304784	0.00639973
ENSG00000163902_pdb	6s7o	AD	0.113084	0.020707		0.0940409	0.0193332
ENSG00000172175_pdb	4i1p	AD	0.113588	0.0207405		0.527815	0.110002
ENSG00000267476_pdb	4i1p	AD	0.113588	0.020774		0.527815	0.110035
ENSG00000126231_pdb	3h5c	AD	0.113681	0.0208075		0.187452	0.0377618
ENSG00000164168_pdb	6pdm	AD	0.113747	0.020841		0.0624117	0.0127325
ENSG00000150656_pdb	3dlj	AD	0.113823	0.0208745		0.127028	0.0256659
ENSG00000272297_pdb	6me2	AD	0.114318	0.020908		0.329402	0.0681856
ENSG00000168412_pdb	6me2	AD	0.114318	0.0209415		0.329402	0.0682191
ENSG00000130816_pdb	4wxx	AD	0.114359	0.020975		0.0744926	0.01548
ENSG00000006638_pdb	6iiu	AD	0.114393	0.0210085		0.132745	0.0267046
ENSG00000111144_pdb	1gw6	AD	0.114395	0.0210421		0.397095	0.083364
ENSG00000106052_pdb	4z4k	AD	0.114405	0.0210756		0.115444	0.023555
ENSG00000067141_pdb	4ui2	AD	0.114774	0.0211091		0.402805	0.0847378
ENSG00000099795_pdb	5xtc	AD	0.114877	0.0211426		0.460128	0.0954934
ENSG00000164169_pdb	6pdm	AD	0.114946	0.0211761		0.0630453	0.012967
ENSG00000115364_pdb	3j7y	AD	0.115274	0.0212096		0.348619	0.0724745
ENSG00000005436_pdb	3j7y	AD	0.115274	0.0212431		0.348619	0.0724409
ENSG00000204983_pdb	1fxy	AD	0.115281	0.0212766		0.0682064	0.0143743
ENSG00000144677_pdb	2hhl	AD	0.115483	0.0213101		0.287076	0.0592394
ENSG00000064012_pdb	5jqe	AD	0.115576	0.0213436		0.0234308	0.00502597
ENSG00000166483_pdb	1x8b	AD	0.115628	0.0213771		0.313865	0.064835
ENSG00000173465_pdb	6hcz	AD	0.116184	0.0214106		0.24295	0.0496566
ENSG00000165280_pdb	5c18	AD	0.116312	0.0214441		0.0349978	0.00747194
ENSG00000169410_pdb	2pa5	AD	0.11641	0.0214776		0.598651	0.124376
ENSG00000165731_pdb	6q2o	AD	0.116716	0.0215111		0.517222	0.107656
ENSG00000196865_pdb	6gc1	AD	0.117001	0.0215446		0.599847	0.124543
ENSG00000061273_pdb	3c0y	AD	0.117797	0.0215782		0.0543394	0.0110236
ENSG00000111880_pdb	3s24	AD	0.11783	0.0216117		0.273078	0.0563914
ENSG00000128833_pdb	4zg4	AD	0.117948	0.0216452		0.275557	0.0568604
ENSG00000091127_pdb	5kkp	AD	0.118181	0.0216787		0.00391966	0.00107221
ENSG00000127318_pdb	1m4r	AD	0.118264	0.0217122		0.0358402	0.00760596
ENSG00000185627_pdb	5gjq	AD	0.118309	0.0217457		0.680036	0.140426
ENSG00000115306_pdb	3edv	AD	0.118616	0.0217792		0.274721	0.0566929
ENSG00000113649_pdb	4fqg	AD	0.119005	0.0218127		0.353333	0.0737477
ENSG00000171806_pdb	4rfq	AD	0.119009	0.0218462		0.0636058	0.013101
ENSG00000145743_pdb	6w66	AD	0.119177	0.0218797		0.684617	0.141297
ENSG00000174469_pdb	5y4m	AD	0.119365	0.0219132		0.432582	0.0904674
ENSG00000010278_pdb	6k4j	AD	0.119517	0.0219467		0.00260643	0.000603116
ENSG00000161011_pdb	6miu	AD	0.119902	0.0219802		0.836063	0.170447
ENSG00000178445_pdb	6i34	AD	0.120169	0.0220137		0.568549	0.118043
ENSG00000116586_pdb	5x6u	AD	0.120385	0.0220472		0.816387	0.166527
ENSG00000082512_pdb	7l3l	AD	0.120564	0.0220808		0.0163244	0.00335064
ENSG00000067955_pdb	4n9f	AD	0.120574	0.0221143		0.0120563	0.00227844
ENSG00000050820_pdb	3t6g	AD	0.120627	0.0221478		0.298296	0.0616854
ENSG00000248676_pdb	6i7s	AD	0.120759	0.0221813		0.20571	0.041682
ENSG00000100036_pdb	2esb	AD	0.120779	0.0222148		0.21382	0.043927
ENSG00000167065_pdb	2esb	AD	0.120779	0.0222483		0.213821	0.0439605
ENSG00000172638_pdb	2kl7	AD	0.120786	0.0222818		0.0748768	0.015547
ENSG00000125779_pdb	5e+26	AD	0.121088	0.0223153		0.191063	0.0386999
ENSG00000164134_pdb	6c95	AD	0.121105	0.0223488		0.335792	0.0698945
ENSG00000167671_pdb	6sap	AD	0.121159	0.0223823		0.466135	0.0971017
ENSG00000109991_pdb	5svk	AD	0.121195	0.0224158		0.0360059	0.00763947
ENSG00000196683_pdb	7ck6	AD	0.121337	0.0224493		0.129178	0.026068
ENSG00000168995_pdb	1o7v	AD	0.121364	0.0224828		0.237758	0.0486514
ENSG00000132906_pdb	1nw9	AD	0.121638	0.0225163		0.129475	0.0261015
ENSG00000185122_pdb	2ldu	AD	0.121641	0.0225498		0.23228	0.0473781
ENSG00000066926_pdb	1hrk	AD	0.121651	0.0225833		0.128996	0.0259675
ENSG00000138496_pdb	5ail	AD	0.121653	0.0226169		0.830091	0.169107
ENSG00000141540_pdb	7p54	AD	0.122279	0.0226504		0.178909	0.0360194
ENSG00000128394_pdb	3wus	AD	0.12233	0.0226839		0.46841	0.0977383
ENSG00000113742_pdb	2mki	AD	0.122466	0.0227174		0.162786	0.0326353
ENSG00000159197_pdb	2m0q	AD	0.122497	0.0227509		0.167129	0.0332719
ENSG00000115009_pdb	1m8a	AD	0.122581	0.0227844		0.456986	0.0949238
ENSG00000197724_pdb	3ptr	AD	0.122723	0.0228179		0.473277	0.098777
ENSG00000115484_pdb	7lum	AD	0.1229	0.0228514		0.0713162	0.0149774
ENSG00000188393_pdb	4iop	AD	0.123382	0.0228849		0.254263	0.0516334
ENSG00000091436_pdb	5hes	AD	0.123458	0.0229184		0.0112344	0.00221143
ENSG00000116729_pdb	7drt	AD	0.123468	0.0229519		0.205384	0.0416485
ENSG00000037757_pdb	4ldq	AD	0.123752	0.0229854		0.027384	0.00579662
ENSG00000136003_pdb	5kz5	AD	0.123887	0.0230189		0.0196487	0.00402077
ENSG00000175643_pdb	3mxn	AD	0.124006	0.0230524		0.672267	0.138951
ENSG00000113300_pdb	7ax1	AD	0.124365	0.0230859		0.212174	0.0433909
ENSG00000130414_pdb	5xtc	AD	0.124366	0.0231195		0.156669	0.0316971
ENSG00000082898_pdb	4bsm	AD	0.124519	0.023153		0.39701	0.083297
ENSG00000249915_pdb	2zn8	AD	0.124592	0.0231865		0.61267	0.126922
ENSG00000135111_pdb	1h6f	AD	0.124767	0.02322		0.240957	0.049288
ENSG00000100453_pdb	1fq3	AD	0.124893	0.0232535		0.064609	0.0134361
ENSG00000258657_pdb	1fq3	AD	0.124893	0.023287		0.0646087	0.0134026
ENSG00000137801_pdb	5foe	AD	0.124962	0.0233205		0.801204	0.163377
ENSG00000025800_pdb	4uad	AD	0.125212	0.023354		0.103078	0.0213436
ENSG00000010072_pdb	6mdw	AD	0.125603	0.0233875		0.28212	0.0582677
ENSG00000102924_pdb	5kc5	AD	0.126139	0.023421		0.215771	0.044329
ENSG00000070495_pdb	6mev	AD	0.126241	0.0234545		0.13899	0.0282794
ENSG00000167754_pdb	2psx	AD	0.126284	0.023488		0.368719	0.0770983
ENSG00000135506_pdb	3aih	AD	0.126329	0.0235215		0.481822	0.100821
ENSG00000257342_pdb	3aih	AD	0.126329	0.023555		0.481822	0.100787
ENSG00000206562_pdb	7okx	AD	0.126355	0.0235885		0.512587	0.106785
ENSG00000144597_pdb	7okx	AD	0.126355	0.023622		0.512587	0.106752
ENSG00000139428_pdb	2idx	AD	0.126514	0.0236556		0.204232	0.0413805
ENSG00000197937_pdb	2ema	AD	0.126536	0.0236891		0.163624	0.0328028
ENSG00000132514_pdb	6puv	AD	0.126583	0.0237226		0.191563	0.0388005
ENSG00000117593_pdb	4ah6	AD	0.126668	0.0237561		0.132773	0.0267381
ENSG00000163781_pdb	6rml	AD	0.127051	0.0237896		0.238711	0.0488524
ENSG00000185482_pdb	2db6	AD	0.127206	0.0238231		0.179135	0.0360864
ENSG00000036530_pdb	2q9f	AD	0.127345	0.0238566		0.0465958	0.00978388
ENSG00000257588_pdb	3d9s	AD	0.127587	0.0238901		0.151123	0.0303233
ENSG00000104723_pdb	4m90	AD	0.127603	0.0239236		0.751646	0.154465
ENSG00000162927_pdb	2v9k	AD	0.127706	0.0239571		0.556397	0.115865
ENSG00000179142_pdb	6xz8	AD	0.127798	0.0239906		0.423784	0.0888256
ENSG00000109606_pdb	6sh6	AD	0.127915	0.0240241		0.600561	0.124678
ENSG00000150753_pdb	6nr8	AD	0.128052	0.0240576		0.121378	0.0246272
ENSG00000154174_pdb	7dhg	AD	0.128094	0.0240911		0.0424559	0.00894622
ENSG00000205220_pdb	6avo	AD	0.128142	0.0241246		0.231464	0.0471436
ENSG00000106541_pdb	2lns	AD	0.128191	0.0241582		0.222231	0.0453677
ENSG00000158050_pdb	1m3g	AD	0.128235	0.0241917		0.107701	0.0222818
ENSG00000072609_pdb	2xoc	AD	0.128335	0.0242252		0.793445	0.161736
ENSG00000087884_pdb	7cun	AD	0.128345	0.0242587		0.333617	0.0692913
ENSG00000261723_pdb	2w18	AD	0.128493	0.0242922		0.263487	0.0536438
ENSG00000135828_pdb	4oau	AD	0.128543	0.0243257		0.0184597	0.00368571
ENSG00000124831_pdb	4h22	AD	0.12858	0.0243592		0.00706472	0.0015413
ENSG00000140598_pdb	5anb	AD	0.128761	0.0243927		0.10639	0.0218797
ENSG00000102931_pdb	2k9a	AD	0.128962	0.0244262		0.0283259	0.00599765
ENSG00000260946_pdb	2k9a	AD	0.128962	0.0244597		0.0283242	0.00596415
ENSG00000169992_pdb	5xeq	AD	0.12897	0.0244932		0.0940362	0.0192997
ENSG00000122176_pdb	5mx0	AD	0.129344	0.0245267		0.396568	0.083163
ENSG00000196586_pdb	6e5n	AD	0.129527	0.0245602		0.0554019	0.0113252
ENSG00000111348_pdb	1ds6	AD	0.129765	0.0245937		0.123355	0.0249623
ENSG00000115946_pdb	6g18	AD	0.130326	0.0246272		0.0756986	0.015681
ENSG00000167549_pdb	7kyx	AD	0.130635	0.0246607		0.279779	0.0578321
ENSG00000264031_pdb	7kyx	AD	0.130635	0.0246943		0.279779	0.0578656
ENSG00000145147_pdb	2v9s	AD	0.130799	0.0247278		0.12183	0.0247278
ENSG00000133961_pdb	5njj	AD	0.130832	0.0247613		0.360637	0.075088
ENSG00000105875_pdb	6vyc	AD	0.130927	0.0247948		0.0909639	0.0184285
ENSG00000156976_pdb	3bor	AD	0.131077	0.0248283		0.130484	0.0263361
ENSG00000112333_pdb	4xaj	AD	0.131153	0.0248618		0.680142	0.140493
ENSG00000153071_pdb	6o5o	AD	0.131253	0.0248953		0.044955	0.00948233
ENSG00000137727_pdb	3msx	AD	0.131519	0.0249288		0.153234	0.0308929
ENSG00000075188_pdb	5a9q	AD	0.131808	0.0249623		0.0841488	0.0172893
ENSG00000183751_pdb	2l73	AD	0.132185	0.0249958		0.325374	0.0670129
ENSG00000196408_pdb	2l73	AD	0.132185	0.0250293		0.325374	0.0670464
ENSG00000118058_pdb	3lqh	AD	0.132201	0.0250628		0.155893	0.0314626
ENSG00000186340_pdb	1yo8	AD	0.132554	0.0250963		0.52641	0.1097
ENSG00000226445_pdb	1yo8	AD	0.132554	0.0251298		0.526412	0.109734
ENSG00000107611_pdb	3kq4	AD	0.132706	0.0251633		0.0702565	0.0146088
ENSG00000124356_pdb	2xze	AD	0.132714	0.0251969		0.271775	0.0557882
ENSG00000123080_pdb	1bu9	AD	0.132841	0.0252304		0.158875	0.0319652
ENSG00000152061_pdb	3hzj	AD	0.132974	0.0252639		0.27897	0.0576646
ENSG00000171557_pdb	3ghg	AD	0.133052	0.0252974		0.8505	0.173329
ENSG00000155918_pdb	4s0u	AD	0.133119	0.0253309		0.249365	0.0508628
ENSG00000130522_pdb	5vpa	AD	0.133125	0.0253644		0.56546	0.117507
ENSG00000054267_pdb	7dm4	AD	0.133206	0.0253979		0.0682713	0.0144413
ENSG00000134243_pdb	3f6k	AD	0.133321	0.0254314		0.268568	0.0551181
ENSG00000123411_pdb	2ma7	AD	0.133661	0.0254649		0.351967	0.0734461
ENSG00000177700_pdb	5iy6	AD	0.133756	0.0254984		0.42449	0.0889931
ENSG00000150961_pdb	3efo	AD	0.133864	0.0255319		0.563416	0.117005
ENSG00000128159_pdb	6v6c	AD	0.133894	0.0255654		0.187699	0.0378288
ENSG00000007168_pdb	7mt1	AD	0.134009	0.0255989		0.461573	0.095996
ENSG00000176919_pdb	2qos	AD	0.1341	0.0256324		0.366817	0.0766963
ENSG00000010256_pdb	5xte	AD	0.13419	0.0256659		0.107794	0.0223823
ENSG00000104267_pdb	12ca	AD	0.134307	0.0256994		0.578144	0.120422
ENSG00000099954_pdb	3nxb	AD	0.134415	0.025733		0.651296	0.134729
ENSG00000152270_pdb	1so2	AD	0.134562	0.0257665		0.613417	0.127257
ENSG00000147854_pdb	4tvr	AD	0.134705	0.0258		0.270315	0.0554867
ENSG00000160209_pdb	2f7k	AD	0.135181	0.0258335		0.15361	0.0309935
ENSG00000083093_pdb	2w18	AD	0.135491	0.025867		0.282753	0.0584352
ENSG00000151276_pdb	5n7d	AD	0.135521	0.0259005		0.560498	0.116334
ENSG00000181192_pdb	6u3j	AD	0.135612	0.025934		0.0843401	0.0173228
ENSG00000103671_pdb	2e5o	AD	0.135619	0.0259675		0.00681604	0.00147428
ENSG00000164825_pdb	1e4s	AD	0.135663	0.026001		0.0935403	0.0191657
ENSG00000245857_pdb	1e4s	AD	0.135663	0.0260345		0.0935403	0.0191992
ENSG00000114331_pdb	6if3	AD	0.135785	0.026068		0.284328	0.0586698
ENSG00000185608_pdb	5ool	AD	0.136181	0.0261015		0.26207	0.0532082
ENSG00000131475_pdb	3cuq	AD	0.13648	0.026135		0.0623869	0.0126989
ENSG00000106268_pdb	7esf	AD	0.136957	0.0261685		0.324642	0.0669459
ENSG00000111669_pdb	1hti	AD	0.137033	0.026202		0.292975	0.0608142
ENSG00000089127_pdb	4ig8	AD	0.137183	0.0262356		0.0792517	0.0163511
ENSG00000113272_pdb	3otb	AD	0.137294	0.0262691		0.232281	0.0474116
ENSG00000133710_pdb	1h0z	AD	0.137317	0.0263026		0.441089	0.0920087
ENSG00000171720_pdb	4a69	AD	0.137358	0.0263361		0.600454	0.124644
ENSG00000163125_pdb	4flb	AD	0.137522	0.0263696		0.335364	0.0696934
ENSG00000065615_pdb	6mv1	AD	0.137533	0.0264031		0.272774	0.0562908
ENSG00000143494_pdb	6j4o	AD	0.137591	0.0264366		0.0705807	0.0147428
ENSG00000176410_pdb	2yua	AD	0.137681	0.0264701		0.0447794	0.00938181
ENSG00000071462_pdb	2yua	AD	0.137681	0.0265036		0.0447794	0.00941531
ENSG00000110025_pdb	6ecm	AD	0.137756	0.0265371		0.490939	0.102664
ENSG00000171864_pdb	1lg4	AD	0.137845	0.0265706		0.179203	0.03612
ENSG00000123329_pdb	2p0f	AD	0.137871	0.0266041		0.216161	0.0444631
ENSG00000110786_pdb	2bv5	AD	0.137944	0.0266376		0.272524	0.0562573
ENSG00000236524_pdb	6saz	AD	0.13796	0.0266711		0.311485	0.0643994
ENSG00000213463_pdb	2eno	AD	0.137983	0.0267046		0.235301	0.0480482
ENSG00000145777_pdb	5j12	AD	0.13807	0.0267381		0.231598	0.0471771
ENSG00000105357_pdb	5i4e	AD	0.13822	0.0267717		0.212948	0.0437594
ENSG00000004660_pdb	6ccf	AD	0.13826	0.0268052		0.209935	0.0428547
ENSG00000237324_pdb	4yff	AD	0.13827	0.0268387		0.575978	0.119819
ENSG00000138356_pdb	4uhw	AD	0.138286	0.0268722		0.428416	0.0898308
ENSG00000104412_pdb	6ww7	AD	0.138358	0.0269057		0.115564	0.0235885
ENSG00000197632_pdb	1by7	AD	0.138578	0.0269392		0.019747	0.00412129
ENSG00000185436_pdb	3og4	AD	0.138608	0.0269727		0.0733129	0.0152789
ENSG00000068305_pdb	1c7u	AD	0.138664	0.0270062		0.108201	0.0224158
ENSG00000145782_pdb	4gdk	AD	0.139355	0.0270397		0.0282131	0.00593064
ENSG00000143409_pdb	5jkn	AD	0.139367	0.0270732		0.0455558	0.00964986
ENSG00000131979_pdb	1fb1	AD	0.139477	0.0271067		0.404692	0.0853744
ENSG00000089225_pdb	5bqd	AD	0.139561	0.0271402		0.11731	0.0239236
ENSG00000166592_pdb	2gjs	AD	0.139917	0.0271737		0.394386	0.0827609
ENSG00000253133_pdb	2e9x	AD	0.140158	0.0272072		0.584162	0.121762
ENSG00000147536_pdb	2e9x	AD	0.140158	0.0272407		0.584161	0.121729
ENSG00000107130_pdb	1g8i	AD	0.140314	0.0272743		0.77077	0.157815
ENSG00000169599_pdb	2ltm	AD	0.140335	0.0273078		0.0618309	0.0125984
ENSG00000130513_pdb	5vt2	AD	0.140423	0.0273413		0.397476	0.0834311
ENSG00000132693_pdb	1b09	AD	0.140525	0.0273748		0.124902	0.0253309
ENSG00000101470_pdb	7kaa	AD	0.140955	0.0274083		0.472245	0.0985425
ENSG00000106105_pdb	4kqe	AD	0.141203	0.0274418		0.384086	0.0804155
ENSG00000145632_pdb	4i5m	AD	0.1417	0.0274753		0.0827951	0.0170883
ENSG00000136319_pdb	2xvs	AD	0.141717	0.0275088		0.299573	0.0620539
ENSG00000168101_pdb	5zcj	AD	0.141863	0.0275423		0.106762	0.0220472
ENSG00000157379_pdb	2qq5	AD	0.141884	0.0275758		0.385989	0.0809516
ENSG00000143379_pdb	6bhd	AD	0.142055	0.0276093		0.728951	0.150008
ENSG00000004700_pdb	2v1x	AD	0.142118	0.0276428		0.0672069	0.0142737
ENSG00000115020_pdb	7k2v	AD	0.142603	0.0276763		0.0973849	0.0200034
ENSG00000171703_pdb	2lw4	AD	0.142793	0.0277098		0.274409	0.0566259
ENSG00000101222_pdb	2ee7	AD	0.142874	0.0277433		0.4409	0.0919417
ENSG00000184371_pdb	1hmc	AD	0.143049	0.0277768		0.824443	0.167834
ENSG00000198952_pdb	2hwy	AD	0.143073	0.0278104		0.316554	0.0652706
ENSG00000179218_pdb	6eny	AD	0.143094	0.0278439		0.459959	0.0954599
ENSG00000152404_pdb	6id0	AD	0.143139	0.0278774		0.192034	0.0389345
ENSG00000101160_pdb	1deu	AD	0.143253	0.0279109		0.129932	0.0262691
ENSG00000107447_pdb	2coe	AD	0.143274	0.0279444		0.208538	0.0423522
ENSG00000049860_pdb	1nou	AD	0.143305	0.0279779		0.116144	0.0236891
ENSG00000110435_pdb	6h60	AD	0.143305	0.0280114		0.319769	0.0659742
ENSG00000197217_pdb	6wg5	AD	0.143546	0.0280449		0.502722	0.104775
ENSG00000115353_pdb	2ks9	AD	0.143715	0.0280784		0.0193797	0.00385324
ENSG00000081479_pdb	2m0p	AD	0.143727	0.0281119		0.209404	0.0427207
ENSG00000236671_pdb	6bdl	AD	0.143788	0.0281454		0.587903	0.1225
ENSG00000062822_pdb	6s1m	AD	0.143828	0.0281789		0.440346	0.0918412
ENSG00000228395_pdb	6b4f	AD	0.144103	0.0282124		0.165288	0.0329368
ENSG00000135655_pdb	6ml1	AD	0.144114	0.0282459		0.0677185	0.0143073
ENSG00000163513_pdb	5e8v	AD	0.144141	0.0282794		0.0210095	0.00455688
ENSG00000102878_pdb	6j6v	AD	0.144186	0.028313		0.189313	0.0383649
ENSG00000225950_pdb	1b8m	AD	0.144237	0.0283465		0.138013	0.0280114
ENSG00000074410_pdb	1jcz	AD	0.14428	0.02838		0.808544	0.165187
ENSG00000137948_pdb	5vbq	AD	0.144371	0.0284135		0.529522	0.110672
ENSG00000147592_pdb	4ad9	AD	0.144381	0.028447		0.0578892	0.0118613
ENSG00000113722_pdb	5lux	AD	0.144494	0.0284805		0.193042	0.0392361
ENSG00000131914_pdb	5udz	AD	0.145058	0.028514		0.222582	0.0455018
ENSG00000141141_pdb	3dkp	AD	0.145136	0.0285475		0.19675	0.0399732
ENSG00000122694_pdb	1smb	AD	0.145338	0.028581		0.109988	0.0226839
ENSG00000140443_pdb	5u8q	AD	0.145379	0.0286145		0.319938	0.0660077
ENSG00000168961_pdb	3wv6	AD	0.14542	0.028648		0.144763	0.0293181
ENSG00000138792_pdb	4kx7	AD	0.145504	0.0286815		0.068401	0.0144748
ENSG00000243766_pdb	2l7z	AD	0.145517	0.028715		0.165987	0.0330039
ENSG00000106031_pdb	2l7z	AD	0.145517	0.0287485		0.165988	0.0330374
ENSG00000128050_pdb	6yb8	AD	0.145561	0.028782		0.00714821	0.0015748
ENSG00000144021_pdb	3fm0	AD	0.145592	0.0288155		0.565776	0.117541
ENSG00000182264_pdb	5jk9	AD	0.145986	0.0288491		0.18283	0.0372257
ENSG00000142549_pdb	6dld	AD	0.146076	0.0288826		0.00340564	0.000804155
ENSG00000035720_pdb	1x1f	AD	0.146465	0.0289161		0.44589	0.0927794
ENSG00000116783_pdb	4yff	AD	0.147061	0.0289496		0.539045	0.11295
ENSG00000259030_pdb	4yff	AD	0.147061	0.0289831		0.539045	0.112917
ENSG00000175581_pdb	5ool	AD	0.147285	0.0290166		0.16026	0.0323672
ENSG00000166750_pdb	6rr9	AD	0.147307	0.0290501		0.178768	0.0359189
ENSG00000076248_pdb	1akz	AD	0.147476	0.0290836		0.0883474	0.0178589
ENSG00000168242_pdb	5gt0	AD	0.147562	0.0291171		0.345247	0.0715028
ENSG00000213886_pdb	2mbe	AD	0.14799	0.0291506		0.0480651	0.0100519
ENSG00000101442_pdb	6hts	AD	0.148067	0.0291841		0.0892995	0.0180265
ENSG00000265690_pdb	6j6v	AD	0.148255	0.0292176		0.569043	0.118378
ENSG00000224531_pdb	6rx3	AD	0.148299	0.0292511		0.0499121	0.0102865
ENSG00000244476_pdb	6rx3	AD	0.148299	0.0292846		0.049912	0.010253
ENSG00000184922_pdb	4ydh	AD	0.148395	0.0293181		0.0160627	0.00321662
ENSG00000197943_pdb	2k2j	AD	0.148594	0.0293517		0.572406	0.119015
ENSG00000259621_pdb	1igr	AD	0.148755	0.0293852		0.774798	0.158519
ENSG00000188986_pdb	6gml	AD	0.148872	0.0294187		0.181532	0.036589
ENSG00000188677_pdb	4edm	AD	0.148898	0.0294522		0.266162	0.0543475
ENSG00000174371_pdb	5uzv	AD	0.149073	0.0294857		0.226899	0.0464399
ENSG00000109189_pdb	5cvm	AD	0.149409	0.0295192		0.131551	0.0264701
ENSG00000174780_pdb	5wrv	AD	0.14949	0.0295527		0.449112	0.0935165
ENSG00000216863_pdb	3b2d	AD	0.149874	0.0295862		0.666921	0.137812
ENSG00000154646_pdb	4dgj	AD	0.149962	0.0296197		0.505576	0.105344
ENSG00000180398_pdb	3a4u	AD	0.149971	0.0296532		0.0963111	0.0198358
ENSG00000228925_pdb	3a4u	AD	0.149971	0.0296867		0.0963111	0.0198023
ENSG00000116221_pdb	5ool	AD	0.150013	0.0297202		0.117635	0.0239906
ENSG00000175970_pdb	7ok7	AD	0.150051	0.0297537		0.255554	0.0519015
ENSG00000183161_pdb	2iqc	AD	0.150145	0.0297872		0.0864302	0.0175574
ENSG00000119392_pdb	6b4f	AD	0.150178	0.0298207		0.175113	0.0352488
ENSG00000118271_pdb	1bz8	AD	0.150191	0.0298542		0.251797	0.0512649
ENSG00000090674_pdb	5wj9	AD	0.150362	0.0298878		0.359362	0.0748534
ENSG00000007312_pdb	3kg5	AD	0.150481	0.0299213		0.139897	0.0283465
ENSG00000129055_pdb	4ui9	AD	0.150518	0.0299548		0.0955392	0.0196013
ENSG00000100614_pdb	1a6q	AD	0.15076	0.0299883		0.158417	0.0318981
ENSG00000137343_pdb	3vwd	AD	0.150841	0.0300218		0.0298883	0.0062322
ENSG00000104872_pdb	4psf	AD	0.150855	0.0300553		0.345662	0.0716703
ENSG00000116574_pdb	2q3h	AD	0.15086	0.0300888		0.286829	0.0591389
ENSG00000139192_pdb	5wer	AD	0.150892	0.0301223		0.291862	0.0604456
ENSG00000116791_pdb	1yb5	AD	0.15112	0.0301558		0.12127	0.0245937
ENSG00000198734_pdb	7kve	AD	0.151231	0.0301893		0.582756	0.121528
ENSG00000172819_pdb	1exa	AD	0.151264	0.0302228		0.0301635	0.00629921
ENSG00000120899_pdb	6lf3	AD	0.151401	0.0302563		0.138683	0.0281119
ENSG00000163682_pdb	2cql	AD	0.151701	0.0302898		0.000807385	0.000234545
ENSG00000100038_pdb	5gvc	AD	0.151723	0.0303233		0.145357	0.0294187
ENSG00000145414_pdb	2eqn	AD	0.151897	0.0303568		0.171096	0.034009
ENSG00000081377_pdb	1ohc	AD	0.151942	0.0303904		0.225788	0.0461719
ENSG00000161835_pdb	2pnt	AD	0.15236	0.0304239		0.10162	0.020841
ENSG00000173482_pdb	2v5y	AD	0.152456	0.0304574		0.114283	0.0233205
ENSG00000170325_pdb	3ihx	AD	0.152489	0.0304909		0.0198912	0.00422181
ENSG00000187498_pdb	6mpx	AD	0.152563	0.0305244		0.519984	0.10836
ENSG00000180776_pdb	6bml	AD	0.152668	0.0305579		0.0198391	0.0041548
ENSG00000183486_pdb	4whj	AD	0.152833	0.0305914		0.0639589	0.013168
ENSG00000140153_pdb	5k1c	AD	0.15337	0.0306249		0.168139	0.0334394
ENSG00000169575_pdb	2h32	AD	0.153455	0.0306584		0.5525	0.114994
ENSG00000155660_pdb	3idv	AD	0.153609	0.0306919		0.806833	0.164684
ENSG00000188690_pdb	1jr2	AD	0.153671	0.0307254		0.012665	0.00254649
ENSG00000117289_pdb	4ll1	AD	0.153737	0.0307589		0.24274	0.0496231
ENSG00000176244_pdb	3epy	AD	0.154442	0.0307924		0.133787	0.0269057
ENSG00000122787_pdb	3bur	AD	0.154453	0.0308259		0.735073	0.151248
ENSG00000119778_pdb	2dkw	AD	0.154767	0.0308594		0.0818639	0.0168873
ENSG00000117139_pdb	5fzi	AD	0.154767	0.0308929		0.0236798	0.00512649
ENSG00000166226_pdb	6nr8	AD	0.154912	0.0309265		0.228156	0.046641
ENSG00000178966_pdb	3mxn	AD	0.155263	0.03096		0.0894557	0.0180935
ENSG00000204209_pdb	4h9n	AD	0.155709	0.0309935		0.327685	0.0677165
ENSG00000153989_pdb	6w2l	AD	0.155917	0.031027		0.148129	0.0299883
ENSG00000147955_pdb	5hk1	AD	0.155998	0.0310605		0.15969	0.0321997
ENSG00000101346_pdb	5ux6	AD	0.156068	0.031094		0.440729	0.0919082
ENSG00000066056_pdb	5n06	AD	0.156179	0.0311275		0.0903718	0.0182945
ENSG00000162631_pdb	3zyj	AD	0.15625	0.031161		0.139991	0.02838
ENSG00000172977_pdb	2eko	AD	0.156353	0.0311945		0.720461	0.1484
ENSG00000149541_pdb	1fgg	AD	0.156364	0.031228		0.191043	0.0386664
ENSG00000122484_pdb	7b7u	AD	0.156479	0.0312615		0.0413556	0.00861116
ENSG00000106785_pdb	6jbm	AD	0.156952	0.031295		0.308816	0.0637293
ENSG00000131037_pdb	2k2m	AD	0.15698	0.0313285		0.592485	0.123371
ENSG00000228278_pdb	3apu	AD	0.157028	0.031362		0.378296	0.0792763
ENSG00000140564_pdb	5jxg	AD	0.157031	0.0313955		0.275156	0.0567934
ENSG00000104870_pdb	3m17	AD	0.157298	0.0314291		0.0242267	0.00526051
ENSG00000108854_pdb	7m3q	AD	0.157428	0.0314626		0.476178	0.0992126
ENSG00000140538_pdb	3v5q	AD	0.15748	0.0314961		0.0399678	0.00844363
ENSG00000131126_pdb	7bpr	AD	0.157557	0.0315296		0.330589	0.0685542
ENSG00000010165_pdb	5wcj	AD	0.15768	0.0315631		0.9903	0.198526
ENSG00000147416_pdb	6wlz	AD	0.157903	0.0315966		0.124757	0.0252974
ENSG00000140600_pdb	2z0v	AD	0.15792	0.0316301		0.0933978	0.0190987
ENSG00000155629_pdb	6sws	AD	0.158157	0.0316636		0.275695	0.056894
ENSG00000143179_pdb	1udw	AD	0.158189	0.0316971		0.418814	0.0878874
ENSG00000143507_pdb	1zzw	AD	0.158223	0.0317306		0.524073	0.10903
ENSG00000176697_pdb	1b8m	AD	0.158308	0.0317641		0.174996	0.0352153
ENSG00000245573_pdb	1b8m	AD	0.158308	0.0317976		0.174995	0.0351818
ENSG00000150687_pdb	6bd4	AD	0.158521	0.0318311		0.325579	0.0671469
ENSG00000174804_pdb	6bd4	AD	0.158521	0.0318646		0.325578	0.0670799
ENSG00000131788_pdb	4mvt	AD	0.158688	0.0318981		0.219158	0.0450327
ENSG00000100804_pdb	4r3o	AD	0.158806	0.0319316		0.266032	0.054314
ENSG00000117748_pdb	2pi2	AD	0.159001	0.0319652		0.0192216	0.00378623
ENSG00000266708_pdb	2il1	AD	0.159128	0.0319987		0.278293	0.0575641
ENSG00000254718_pdb	1a6q	AD	0.159279	0.0320322		0.170688	0.033942
ENSG00000134852_pdb	6qpj	AD	0.159377	0.0320657		0.577303	0.120255
ENSG00000082212_pdb	1gz3	AD	0.159605	0.0320992		0.181878	0.0367231
ENSG00000267059_pdb	5xte	AD	0.15961	0.0321327		0.178153	0.0357179
ENSG00000127540_pdb	5xte	AD	0.15961	0.0321662		0.178153	0.0357514
ENSG00000183696_pdb	3eue	AD	0.159646	0.0321997		0.872	0.177115
ENSG00000079805_pdb	2ys1	AD	0.159692	0.0322332		0.116715	0.0238566
ENSG00000181523_pdb	4mhx	AD	0.159834	0.0322667		0.0374494	0.00797454
ENSG00000122687_pdb	2nyu	AD	0.160081	0.0323002		0.279475	0.0577316
ENSG00000073350_pdb	6n8q	AD	0.160384	0.0323337		0.643369	0.133523
ENSG00000121988_pdb	5mkw	AD	0.160403	0.0323672		0.0510745	0.0104875
ENSG00000086062_pdb	2ae7	AD	0.160678	0.0324007		0.757464	0.155503
ENSG00000144410_pdb	5mrv	AD	0.160738	0.0324342		0.59011	0.122868
ENSG00000159110_pdb	1n6u	AD	0.160839	0.0324678		0.641739	0.133155
ENSG00000255126_pdb	3tkj	AD	0.160979	0.0325013		0.219294	0.0450662
ENSG00000269177_pdb	1xna	AD	0.160982	0.0325348		0.603344	0.125214
ENSG00000203772_pdb	3e4e	AD	0.161005	0.0325683		0.847727	0.172659
ENSG00000130649_pdb	3e4e	AD	0.161005	0.0326018		0.847727	0.172625
ENSG00000131773_pdb	5elt	AD	0.161037	0.0326353		0.0784837	0.0161501
ENSG00000104371_pdb	5o57	AD	0.161044	0.0326688		0.268446	0.0550846
ENSG00000177414_pdb	1yrv	AD	0.161214	0.0327023		0.212212	0.0434579
ENSG00000106633_pdb	1v4s	AD	0.161268	0.0327358		0.267514	0.0548166
ENSG00000044115_pdb	4igg	AD	0.161332	0.0327693		0.0652889	0.0136706
ENSG00000115524_pdb	5z58	AD	0.161822	0.0328028		0.59026	0.122935
ENSG00000124664_pdb	2dkx	AD	0.161989	0.0328363		0.180381	0.036388
ENSG00000196188_pdb	1tzs	AD	0.162136	0.0328698		0.642174	0.133222
ENSG00000131941_pdb	2vsv	AD	0.162196	0.0329033		0.167578	0.0333724
ENSG00000105397_pdb	4po6	AD	0.16238	0.0329368		0.0385847	0.0083096
ENSG00000008018_pdb	5l5b	AD	0.16247	0.0329703		0.251632	0.0512314
ENSG00000047457_pdb	1kcw	AD	0.162679	0.0330039		0.290166	0.059943
ENSG00000163631_pdb	6zl1	AD	0.162997	0.0330374		0.12323	0.0249288
ENSG00000180900_pdb	6eey	AD	0.163087	0.0330709		0.232689	0.0475792
ENSG00000138642_pdb	5w87	AD	0.163127	0.0331044		0.188707	0.0381638
ENSG00000196943_pdb	1d4b	AD	0.163157	0.0331379		0.0348431	0.00733791
ENSG00000136305_pdb	1d4b	AD	0.163157	0.0331714		0.0348432	0.00740493
ENSG00000213906_pdb	1d4b	AD	0.163157	0.0332049		0.0348431	0.00737142
ENSG00000135374_pdb	1wwx	AD	0.163159	0.0332384		0.87349	0.177283
ENSG00000139890_pdb	3cbq	AD	0.163241	0.0332719		0.3279	0.0678506
ENSG00000186318_pdb	4i11	AD	0.163255	0.0333054		0.120333	0.0243927
ENSG00000009844_pdb	2lxl	AD	0.163556	0.0333389		0.00180273	0.00046909
ENSG00000113522_pdb	5gox	AD	0.163574	0.0333724		0.194262	0.0393701
ENSG00000114786_pdb	1q7l	AD	0.163848	0.0334059		0.101411	0.020774
ENSG00000243989_pdb	1q7l	AD	0.163848	0.0334394		0.101411	0.0208075
ENSG00000166828_pdb	6bqn	AD	0.163856	0.0334729		0.0919425	0.0185626
ENSG00000122550_pdb	3ii7	AD	0.163906	0.0335064		0.477136	0.0994471
ENSG00000119912_pdb	2g47	AD	0.164644	0.03354		0.489222	0.102161
ENSG00000089123_pdb	6ugk	AD	0.164706	0.0335735		0.192753	0.039102
ENSG00000249624_pdb	1n6u	AD	0.164877	0.033607		0.561012	0.116535
ENSG00000116717_pdb	2kg4	AD	0.164885	0.0336405		0.0837196	0.0172223
ENSG00000110717_pdb	5xtb	AD	0.165134	0.033674		0.0555838	0.0113922
ENSG00000092295_pdb	2xzz	AD	0.165156	0.0337075		0.370715	0.0773999
ENSG00000103316_pdb	2i99	AD	0.165252	0.033741		0.634847	0.131446
ENSG00000138756_pdb	4w9w	AD	0.165413	0.0337745		0.0926792	0.0188976
ENSG00000113648_pdb	5iit	AD	0.16554	0.033808		0.528235	0.110102
ENSG00000104805_pdb	1snl	AD	0.165605	0.0338415		0.659909	0.136237
ENSG00000128881_pdb	6u0k	AD	0.165632	0.033875		0.112328	0.0229854
ENSG00000133247_pdb	3rq4	AD	0.165693	0.0339085		0.1202	0.0243257
ENSG00000159527_pdb	1sk3	AD	0.16605	0.033942		0.173917	0.0348467
ENSG00000116096_pdb	6i6c	AD	0.166072	0.0339755		0.290281	0.0600436
ENSG00000140505_pdb	2hi4	AD	0.166255	0.034009		0.1135	0.0231865
ENSG00000114503_pdb	1h2t	AD	0.16636	0.0340426		0.0575874	0.0117943
ENSG00000236498_pdb	6nr8	AD	0.166433	0.0340761		0.102799	0.0213101
ENSG00000123485_pdb	3r45	AD	0.16663	0.0341096		0.292072	0.0605126
ENSG00000271786_pdb	5wwq	AD	0.167007	0.0341431		0.0561939	0.0114927
ENSG00000027075_pdb	3txo	AD	0.167255	0.0341766		0.692607	0.142838
ENSG00000155657_pdb	6ygn	AD	0.167434	0.0342101		0.214286	0.0440945
ENSG00000205683_pdb	2kwj	AD	0.167736	0.0342436		0.213583	0.0438934
ENSG00000204956_pdb	5k8r	AD	0.167866	0.0342771		0.271779	0.0559893
ENSG00000262576_pdb	5k8r	AD	0.167866	0.0343106		0.271779	0.0559558
ENSG00000254221_pdb	5k8r	AD	0.167866	0.0343441		0.271779	0.0559223
ENSG00000081853_pdb	5k8r	AD	0.167866	0.0343776		0.271779	0.0558888
ENSG00000262209_pdb	5k8r	AD	0.167866	0.0344111		0.271779	0.0560228
ENSG00000253910_pdb	5k8r	AD	0.167866	0.0344446		0.271779	0.0560563
ENSG00000253485_pdb	5k8r	AD	0.167866	0.0344781		0.271779	0.0558217
ENSG00000254245_pdb	5k8r	AD	0.167866	0.0345116		0.271779	0.0558553
ENSG00000072210_pdb	4qgk	AD	0.167967	0.0345451		0.278609	0.0576311
ENSG00000128917_pdb	5mvx	AD	0.167983	0.0345787		0.373267	0.078003
ENSG00000137818_pdb	4beh	AD	0.168566	0.0346122		0.107043	0.0222483
ENSG00000213904_pdb	2gk2	AD	0.168667	0.0346457		0.136971	0.0276428
ENSG00000079385_pdb	2gk2	AD	0.168667	0.0346792		0.136971	0.0276093
ENSG00000111321_pdb	4mxw	AD	0.168707	0.0347127		0.208419	0.0422851
ENSG00000156006_pdb	2pfr	AD	0.168859	0.0347462		0.489731	0.102396
ENSG00000155876_pdb	6ces	AD	0.168868	0.0347797		0.30488	0.0629921
ENSG00000112096_pdb	1ap5	AD	0.169023	0.0348132		0.212142	0.0433573
ENSG00000126088_pdb	1jph	AD	0.169225	0.0348467		0.0363029	0.00767298
ENSG00000111540_pdb	2hei	AD	0.16928	0.0348802		0.535945	0.112146
ENSG00000072163_pdb	3ixe	AD	0.169353	0.0349137		0.717799	0.147864
ENSG00000144736_pdb	2mnw	AD	0.169575	0.0349472		0.389485	0.0815882
ENSG00000238133_pdb	5hes	AD	0.169646	0.0349807		0.0143747	0.00281454
ENSG00000142731_pdb	4n7v	AD	0.16967	0.0350142		0.250204	0.0510303
ENSG00000130669_pdb	4fie	AD	0.169766	0.0350477		0.438033	0.0916401
ENSG00000166257_pdb	4l1d	AD	0.170201	0.0350813		0.73275	0.150746
ENSG00000175792_pdb	5izl	AD	0.170242	0.0351148		0.364323	0.0759256
ENSG00000184348_pdb	5kgf	AD	0.170298	0.0351483		0.773271	0.158184
ENSG00000118007_pdb	6wg3	AD	0.170514	0.0351818		0.367106	0.0767298
ENSG00000196954_pdb	6nry	AD	0.170678	0.0352153		0.191662	0.038834
ENSG00000156603_pdb	7emf	AD	0.170837	0.0352488		0.473108	0.0987435
ENSG00000099256_pdb	2jbh	AD	0.170838	0.0352823		0.698755	0.144145
ENSG00000075711_pdb	3lra	AD	0.170839	0.0353158		0.904292	0.183515
ENSG00000089220_pdb	1bd9	AD	0.171147	0.0353493		0.195025	0.0396046
ENSG00000079337_pdb	6h7e	AD	0.171199	0.0353828		0.481582	0.100754
ENSG00000107882_pdb	4bl8	AD	0.171245	0.0354163		0.0123328	0.00244597
ENSG00000149262_pdb	7cun	AD	0.171275	0.0354498		0.397778	0.0834981
ENSG00000107581_pdb	6ybd	AD	0.171765	0.0354833		0.142931	0.0290501
ENSG00000146021_pdb	4ch9	AD	0.171819	0.0355168		0.619533	0.128363
ENSG00000171865_pdb	2qk9	AD	0.17186	0.0355503		0.586723	0.122232
ENSG00000154310_pdb	6ra5	AD	0.171993	0.0355838		0.132073	0.0265371
ENSG00000100079_pdb	1hlc	AD	0.172183	0.0356174		0.288569	0.0596415
ENSG00000196502_pdb	1ls6	AD	0.172187	0.0356509		0.0990038	0.0202714
ENSG00000174444_pdb	3if8	AD	0.172426	0.0356844		0.271434	0.0557212
ENSG00000113600_pdb	6h04	AD	0.172634	0.0357179		0.298085	0.0616184
ENSG00000197312_pdb	2n7d	AD	0.172678	0.0357514		0.0198514	0.00418831
ENSG00000120693_pdb	6fzt	AD	0.172846	0.0357849		0.153931	0.031094
ENSG00000105383_pdb	6tl8	AD	0.172997	0.0358184		0.327255	0.067549
ENSG00000163686_pdb	7ots	AD	0.173237	0.0358519		0.282544	0.0583682
ENSG00000116329_pdb	4n6h	AD	0.173357	0.0358854		0.30987	0.0640978
ENSG00000177098_pdb	5xaw	AD	0.173488	0.0359189		0.561068	0.116569
ENSG00000162692_pdb	1ij9	AD	0.174364	0.0359524		0.0326388	0.0067348
ENSG00000158887_pdb	3oai	AD	0.174424	0.0359859		0.366223	0.0764617
ENSG00000137760_pdb	3tht	AD	0.174549	0.0360194		0.137694	0.0279444
ENSG00000115414_pdb	6mfa	AD	0.174656	0.0360529		0.0321738	0.00666778
ENSG00000206418_pdb	2il1	AD	0.174786	0.0360864		0.0353546	0.00750544
ENSG00000165417_pdb	5m4s	AD	0.175046	0.03612		0.304372	0.0628581
ENSG00000139687_pdb	4elj	AD	0.175122	0.0361535		0.113533	0.02322
ENSG00000100243_pdb	1umk	AD	0.175299	0.036187		0.0313767	0.00650025
ENSG00000134240_pdb	2wya	AD	0.175521	0.0362205		0.0972581	0.0199363
ENSG00000120896_pdb	2yup	AD	0.175569	0.036254		0.624933	0.129435
ENSG00000136827_pdb	5j1s	AD	0.175602	0.0362875		0.390874	0.0819568
ENSG00000198853_pdb	6if2	AD	0.176107	0.036321		0.141948	0.028715
ENSG00000231840_pdb	1yzx	AD	0.176158	0.0363545		0.703251	0.145083
ENSG00000197448_pdb	1yzx	AD	0.176158	0.036388		0.703251	0.145049
ENSG00000087589_pdb	2cre	AD	0.176208	0.0364215		0.0550052	0.0111912
ENSG00000106628_pdb	6s1m	AD	0.176622	0.036455		0.39544	0.0829955
ENSG00000156299_pdb	2d8i	AD	0.176665	0.0364885		0.0643158	0.0132686
ENSG00000137502_pdb	2ew1	AD	0.176679	0.036522		0.389212	0.0815212
ENSG00000181090_pdb	2igq	AD	0.176817	0.0365555		0.157523	0.0317976
ENSG00000248890_pdb	2wft	AD	0.17725	0.036589		0.0383405	0.00824259
ENSG00000255680_pdb	3edy	AD	0.177923	0.0366225		0.333049	0.0690568
ENSG00000188037_pdb	6qvb	AD	0.177937	0.0366561		0.37712	0.0789747
ENSG00000062038_pdb	4oy9	AD	0.178079	0.0366896		0.000948763	0.000301558
ENSG00000143321_pdb	2nlu	AD	0.178116	0.0367231		0.309137	0.0638968
ENSG00000131791_pdb	6b2e	AD	0.17818	0.0367566		0.650062	0.134294
ENSG00000105707_pdb	1z8g	AD	0.178602	0.0367901		0.0654183	0.0138382
ENSG00000227392_pdb	1z8g	AD	0.178602	0.0368236		0.065418	0.0138047
ENSG00000016490_pdb	6pyo	AD	0.178642	0.0368571		0.0850216	0.0174569
ENSG00000070669_pdb	6gq3	AD	0.179268	0.0368906		0.106424	0.0219132
ENSG00000115317_pdb	5m3o	AD	0.179403	0.0369241		0.0218688	0.00475792
ENSG00000198848_pdb	1ya4	AD	0.179455	0.0369576		0.669813	0.138449
ENSG00000109805_pdb	6igx	AD	0.179622	0.0369911		0.355441	0.0741163
ENSG00000110881_pdb	6l6i	AD	0.179664	0.0370246		0.197202	0.0401072
ENSG00000084072_pdb	5mqf	AD	0.179679	0.0370581		0.25288	0.0514659
ENSG00000004139_pdb	6o5e	AD	0.179753	0.0370916		0.188978	0.0382644
ENSG00000109072_pdb	6o5e	AD	0.179753	0.0371251		0.188976	0.0381974
ENSG00000244045_pdb	6o5e	AD	0.179753	0.0371587		0.188976	0.0382309
ENSG00000147548_pdb	4rxj	AD	0.179782	0.0371922		0.363208	0.0755906
ENSG00000153015_pdb	2hq6	AD	0.179842	0.0372257		0.0528111	0.0108896
ENSG00000183134_pdb	7m8w	AD	0.179927	0.0372592		0.611086	0.126688
ENSG00000084676_pdb	3ctb	AD	0.179978	0.0372927		0.626975	0.12977
ENSG00000251503_pdb	4drb	AD	0.180136	0.0373262		0.17723	0.0355503
ENSG00000175279_pdb	4drb	AD	0.180136	0.0373597		0.17723	0.0355168
ENSG00000140398_pdb	1tdh	AD	0.180319	0.0373932		0.142986	0.0290836
ENSG00000172123_pdb	7lrd	AD	0.180393	0.0374267		0.0693508	0.0145418
ENSG00000172336_pdb	6ahr	AD	0.180444	0.0374602		0.216919	0.0447311
ENSG00000106462_pdb	6wkr	AD	0.180515	0.0374937		0.354734	0.0739822
ENSG00000138796_pdb	3rqs	AD	0.180739	0.0375272		0.435091	0.091037
ENSG00000163914_pdb	5w0p	AD	0.180785	0.0375607		0.134154	0.0271402
ENSG00000165948_pdb	2loq	AD	0.180895	0.0375942		0.401822	0.0845368
ENSG00000014824_pdb	2enk	AD	0.180898	0.0376277		0.132134	0.0265706
ENSG00000118507_pdb	5jj2	AD	0.181063	0.0376612		0.0648369	0.0135701
ENSG00000171724_pdb	4a27	AD	0.181753	0.0376948		0.828713	0.168906
ENSG00000168096_pdb	4nj8	AD	0.181894	0.0377283		0.327106	0.0675155
ENSG00000241106_pdb	4i0p	AD	0.182013	0.0377618		0.549527	0.114559
ENSG00000161638_pdb	7nxd	AD	0.182125	0.0377953		0.72305	0.149003
ENSG00000258086_pdb	7nxd	AD	0.182125	0.0378288		0.72305	0.148936
ENSG00000258137_pdb	7nxd	AD	0.182125	0.0378623		0.72305	0.14897
ENSG00000267531_pdb	3rq4	AD	0.182207	0.0378958		0.140091	0.0284135
ENSG00000106853_pdb	1zsv	AD	0.182415	0.0379293		0.302609	0.062523
ENSG00000013725_pdb	5a2e	AD	0.182599	0.0379628		0.61085	0.126587
ENSG00000169129_pdb	2cof	AD	0.182912	0.0379963		0.143778	0.0291506
ENSG00000005156_pdb	3l2p	AD	0.182969	0.0380298		0.214236	0.044061
ENSG00000085274_pdb	2vpk	AD	0.183099	0.0380633		0.738891	0.151885
ENSG00000137413_pdb	6mzc	AD	0.183316	0.0380968		0.0741295	0.0153795
ENSG00000185532_pdb	6bdl	AD	0.18338	0.0381303		0.636389	0.131747
ENSG00000166169_pdb	1rzt	AD	0.183489	0.0381638		0.0941654	0.0193667
ENSG00000166171_pdb	1rzt	AD	0.183489	0.0381974		0.0941655	0.0194002
ENSG00000180871_pdb	6lfm	AD	0.184022	0.0382309		0.289424	0.0597755
ENSG00000198001_pdb	6o8u	AD	0.184097	0.0382644		0.876662	0.177919
ENSG00000063978_pdb	2ea6	AD	0.1841	0.0382979		0.402966	0.0848048
ENSG00000135521_pdb	6g18	AD	0.184107	0.0383314		0.261367	0.0530407
ENSG00000100209_pdb	3bvo	AD	0.184422	0.0383649		0.210788	0.0429888
ENSG00000168610_pdb	6qhd	AD	0.184631	0.0383984		0.466458	0.0971687
ENSG00000161542_pdb	2c4k	AD	0.184898	0.0384319		0.656145	0.135601
ENSG00000198721_pdb	4u18	AD	0.185125	0.0384654		0.0798397	0.0164182
ENSG00000185689_pdb	4u18	AD	0.185125	0.0384989		0.0798402	0.0164517
ENSG00000108506_pdb	7cun	AD	0.185298	0.0385324		0.376309	0.0787067
ENSG00000103152_pdb	1bnk	AD	0.185587	0.0385659		0.393105	0.0824594
ENSG00000152056_pdb	4hmy	AD	0.185834	0.0385994		0.209544	0.0427542
ENSG00000111196_pdb	6icz	AD	0.186128	0.0386329		0.26132	0.0530072
ENSG00000070731_pdb	6apj	AD	0.186265	0.0386664		0.308245	0.0635617
ENSG00000167986_pdb	2b5l	AD	0.186928	0.0386999		0.245282	0.0500251
ENSG00000258525_pdb	1jbi	AD	0.186958	0.0387335		0.214447	0.0441615
ENSG00000118898_pdb	4q28	AD	0.187102	0.038767		0.210372	0.0428883
ENSG00000139292_pdb	4bsr	AD	0.187178	0.0388005		0.370634	0.0773329
ENSG00000196569_pdb	4yep	AD	0.187197	0.038834		0.576176	0.119886
ENSG00000075856_pdb	5ctq	AD	0.187238	0.0388675		0.00657319	0.00134026
ENSG00000092200_pdb	4qam	AD	0.187599	0.038901		0.0943223	0.0194337
ENSG00000143228_pdb	2ve7	AD	0.187693	0.0389345		0.576439	0.120087
ENSG00000144381_pdb	4pj1	AD	0.188101	0.038968		0.198774	0.0404088
ENSG00000184349_pdb	3mx0	AD	0.188266	0.0390015		0.572391	0.118948
ENSG00000138823_pdb	6i7s	AD	0.188433	0.039035		0.335521	0.0697939
ENSG00000131042_pdb	6aed	AD	0.188841	0.0390685		0.0236529	0.00509298
ENSG00000146648_pdb	1nql	AD	0.189003	0.039102		0.220958	0.0453007
ENSG00000140043_pdb	2w98	AD	0.189037	0.0391355		0.110287	0.0227174
ENSG00000258653_pdb	2w98	AD	0.189037	0.039169		0.110288	0.0227509
ENSG00000154783_pdb	3mpx	AD	0.189247	0.0392025		0.155283	0.031295
ENSG00000171564_pdb	3ghg	AD	0.189336	0.0392361		0.0692957	0.0145083
ENSG00000170017_pdb	5a2f	AD	0.189532	0.0392696		0.196404	0.0398392
ENSG00000156876_pdb	6z4a	AD	0.190179	0.0393031		0.291052	0.0601776
ENSG00000119888_pdb	4mzv	AD	0.190336	0.0393366		0.191288	0.0387335
ENSG00000113163_pdb	4hhv	AD	0.190471	0.0393701		0.188115	0.0378958
ENSG00000113240_pdb	6fyv	AD	0.190471	0.0394036		0.208591	0.0423857
ENSG00000243708_pdb	5nfn	AD	0.190542	0.0394371		0.792833	0.161401
ENSG00000243789_pdb	5nfn	AD	0.190542	0.0394706		0.792832	0.161367
ENSG00000168970_pdb	5nfn	AD	0.190542	0.0395041		0.792845	0.161468
ENSG00000135930_pdb	2jgb	AD	0.190733	0.0395376		0.147338	0.0298542
ENSG00000172007_pdb	6y09	AD	0.190831	0.0395711		0.277736	0.0574636
ENSG00000128383_pdb	2m65	AD	0.191089	0.0396046		0.0624874	0.012766
ENSG00000035664_pdb	1wmk	AD	0.191902	0.0396381		0.224961	0.0461049
ENSG00000074266_pdb	3iiw	AD	0.192004	0.0396716		0.485145	0.101424
ENSG00000166908_pdb	2gk9	AD	0.192171	0.0397051		0.321892	0.0664433
ENSG00000019505_pdb	1wfm	AD	0.192319	0.0397386		0.172972	0.0346457
ENSG00000119878_pdb	7dvq	AD	0.192339	0.0397722		0.119698	0.0241917
ENSG00000197181_pdb	3o7x	AD	0.192548	0.0398057		0.572772	0.119082
ENSG00000122376_pdb	1l1f	AD	0.192649	0.0398392		0.0148287	0.00301558
ENSG00000146070_pdb	3d59	AD	0.192676	0.0398727		0.336383	0.0699615
ENSG00000237883_pdb	2ocp	AD	0.192755	0.0399062		0.238672	0.0488189
ENSG00000159713_pdb	2jrf	AD	0.193261	0.0399397		0.351783	0.0733121
ENSG00000068796_pdb	1zq9	AD	0.194152	0.0399732		0.560239	0.116267
ENSG00000086189_pdb	1zq9	AD	0.194152	0.0400067		0.560239	0.116301
ENSG00000091483_pdb	30000	AD	0.194232	0.0400402		0.562117	0.11687
ENSG00000096996_pdb	6wdp	AD	0.194637	0.0400737		0.231223	0.0470766
ENSG00000166888_pdb	4y5u	AD	0.194716	0.0401072		0.294519	0.0609817
ENSG00000255339_pdb	5xtc	AD	0.195013	0.0401407		0.458193	0.0952253
ENSG00000075826_pdb	5xtc	AD	0.195013	0.0401742		0.45819	0.0951583
ENSG00000166136_pdb	5xtc	AD	0.195013	0.0402077		0.458192	0.0951918
ENSG00000184719_pdb	3qj4	AD	0.19506	0.0402412		0.187167	0.0376612
ENSG00000161202_pdb	6zc6	AD	0.195305	0.0402748		0.0762658	0.0157815
ENSG00000101384_pdb	4cc0	AD	0.195349	0.0403083		0.2146	0.0442285
ENSG00000182667_pdb	6dlf	AD	0.195472	0.0403418		0.219908	0.0450997
ENSG00000240666_pdb	1dmt	AD	0.195519	0.0403753		0.693358	0.14314
ENSG00000198931_pdb	1ore	AD	0.196129	0.0404088		0.368857	0.0771318
ENSG00000136878_pdb	6kcz	AD	0.19641	0.0404423		0.603936	0.125381
ENSG00000123737_pdb	2nn6	AD	0.196428	0.0404758		0.197676	0.0401407
ENSG00000112299_pdb	4cyf	AD	0.196532	0.0405093		0.625641	0.129536
ENSG00000163808_pdb	4bn2	AD	0.196633	0.0405428		0.536665	0.11228
ENSG00000109320_pdb	3gut	AD	0.196639	0.0405763		0.479926	0.100452
ENSG00000073756_pdb	5f19	AD	0.196829	0.0406098		0.435652	0.0911375
ENSG00000112992_pdb	1pt9	AD	0.196853	0.0406433		0.361012	0.075155
ENSG00000130755_pdb	3l50	AD	0.197041	0.0406768		0.361918	0.075356
ENSG00000090273_pdb	3qor	AD	0.197244	0.0407103		0.474116	0.0989781
ENSG00000198400_pdb	2ifg	AD	0.197372	0.0407438		0.033074	0.00683532
ENSG00000153246_pdb	6jli	AD	0.19768	0.0407773		0.765627	0.156676
ENSG00000136897_pdb	3j7y	AD	0.19786	0.0408109		0.305395	0.0632602
ENSG00000161671_pdb	6z3w	AD	0.198206	0.0408444		0.134025	0.0271067
ENSG00000196407_pdb	4ae7	AD	0.198298	0.0408779		0.494818	0.1033
ENSG00000145703_pdb	5cjp	AD	0.198433	0.0409114		0.196625	0.0399397
ENSG00000159128_pdb	6e3k	AD	0.198867	0.0409449		0.632528	0.130809
ENSG00000181104_pdb	3vw7	AD	0.198898	0.0409784		0.0238379	0.0051935
ENSG00000131808_pdb	1fl7	AD	0.199206	0.0410119		0.106107	0.0218462
ENSG00000204228_pdb	4cql	AD	0.199363	0.0410454		0.539813	0.113151
ENSG00000115325_pdb	2v76	AD	0.199368	0.0410789		0.52445	0.109164
ENSG00000131759_pdb	1dkf	AD	0.199874	0.0411124		0.491895	0.102999
ENSG00000114738_pdb	3fhr	AD	0.199909	0.0411459		0.433355	0.0907355
ENSG00000003402_pdb	3h11	AD	0.199931	0.0411794		0.0771151	0.0158821
ENSG00000116260_pdb	4ij3	AD	0.200143	0.0412129		0.329237	0.0681521
ENSG00000091073_pdb	6y22	AD	0.200222	0.0412464		0.174928	0.0351148
ENSG00000166603_pdb	6w25	AD	0.20053	0.0412799		0.411096	0.0866477
ENSG00000148795_pdb	3ruk	AD	0.200649	0.0413135		0.105085	0.0215446
ENSG00000148516_pdb	2e+19	AD	0.200682	0.041347		0.36864	0.0770648
ENSG00000016402_pdb	4doh	AD	0.200821	0.0413805		0.0610645	0.0125314
ENSG00000178105_pdb	2pl3	AD	0.201403	0.041414		0.168854	0.03354
ENSG00000160007_pdb	3fk2	AD	0.201525	0.0414475		0.427965	0.0896633
ENSG00000122679_pdb	6uus	AD	0.201558	0.041481		0.0538063	0.0109901
ENSG00000141505_pdb	1dv8	AD	0.201581	0.0415145		0.794216	0.161903
ENSG00000196781_pdb	1gxr	AD	0.201608	0.041548		0.468062	0.0976378
ENSG00000167910_pdb	3v8d	AD	0.201745	0.0415815		0.142058	0.0287485
ENSG00000249407_pdb	4doh	AD	0.201811	0.041615		0.173789	0.0347462
ENSG00000104067_pdb	3shw	AD	0.201977	0.0416485		0.377797	0.0791757
ENSG00000115598_pdb	6u6u	AD	0.202221	0.041682		0.0895196	0.018127
ENSG00000118762_pdb	5k47	AD	0.20228	0.0417155		0.134291	0.0272072
ENSG00000024526_pdb	2ysr	AD	0.202378	0.041749		0.208643	0.0424862
ENSG00000196743_pdb	1g13	AD	0.202591	0.0417825		0.926896	0.187603
ENSG00000163348_pdb	2xb1	AD	0.202631	0.041816		0.344514	0.0713352
ENSG00000120875_pdb	3ezz	AD	0.20291	0.0418496		0.0853429	0.0174904
ENSG00000198561_pdb	3l6x	AD	0.203268	0.0418831		0.280372	0.0579997
ENSG00000166173_pdb	2mtg	AD	0.203381	0.0419166		0.346315	0.0718378
ENSG00000141378_pdb	1q7s	AD	0.203657	0.0419501		0.696557	0.143776
ENSG00000058453_pdb	6l5j	AD	0.203674	0.0419836		0.376803	0.0789077
ENSG00000130711_pdb	3ep0	AD	0.203678	0.0420171		0.444269	0.0926118
ENSG00000117399_pdb	5lcw	AD	0.203993	0.0420506		0.0373366	0.007807
ENSG00000138398_pdb	2gw2	AD	0.204129	0.0420841		0.0596888	0.0122299
ENSG00000172922_pdb	3puf	AD	0.204183	0.0421176		0.567129	0.117809
ENSG00000145439_pdb	4cqm	AD	0.204189	0.0421511		0.700376	0.144547
ENSG00000242550_pdb	1by7	AD	0.204372	0.0421846		0.0150397	0.00308259
ENSG00000119673_pdb	3hlk	AD	0.204521	0.0422181		0.799835	0.163176
ENSG00000185624_pdb	4ekz	AD	0.204522	0.0422516		0.155709	0.0314291
ENSG00000127616_pdb	2h60	AD	0.204527	0.0422851		0.327017	0.067482
ENSG00000171552_pdb	1lxl	AD	0.204618	0.0423186		0.114836	0.0234545
ENSG00000147679_pdb	6wg3	AD	0.204671	0.0423522		0.235039	0.0479812
ENSG00000205790_pdb	6eoq	AD	0.204967	0.0423857		0.753589	0.154766
ENSG00000132604_pdb	1vf9	AD	0.205508	0.0424192		0.192957	0.039169
ENSG00000066777_pdb	3ltl	AD	0.205745	0.0424527		0.155973	0.0314961
ENSG00000103035_pdb	5gjq	AD	0.205775	0.0424862		0.267925	0.0549841
ENSG00000182450_pdb	4i9w	AD	0.206314	0.0425197		0.100907	0.0206735
ENSG00000107371_pdb	2nn6	AD	0.206387	0.0425532		0.824564	0.167901
ENSG00000255872_pdb	2nn6	AD	0.206387	0.0425867		0.824564	0.167867
ENSG00000163485_pdb	5uen	AD	0.206446	0.0426202		0.528831	0.110437
ENSG00000100393_pdb	5xzc	AD	0.207193	0.0426537		0.626217	0.129636
ENSG00000120889_pdb	1d0g	AD	0.207364	0.0426872		0.191453	0.038767
ENSG00000095303_pdb	6y3c	AD	0.207405	0.0427207		0.640443	0.132786
ENSG00000215845_pdb	6bev	AD	0.207454	0.0427542		0.216263	0.0445301
ENSG00000134470_pdb	2ers	AD	0.207598	0.0427877		0.104482	0.0214776
ENSG00000100413_pdb	7a6h	AD	0.207624	0.0428212		0.711531	0.146892
ENSG00000179091_pdb	5xte	AD	0.208217	0.0428547		0.330499	0.0684537
ENSG00000147443_pdb	2d9w	AD	0.208986	0.0428883		0.235966	0.0481488
ENSG00000136689_pdb	1ilr	AD	0.209012	0.0429218		0.3578	0.0745183
ENSG00000255663_pdb	6n6i	AD	0.209144	0.0429553		0.201851	0.0410454
ENSG00000265168_pdb	1xfb	AD	0.209962	0.0429888		0.335381	0.0697269
ENSG00000004468_pdb	1yh3	AD	0.210025	0.0430223		0.89437	0.181538
ENSG00000170581_pdb	6ux2	AD	0.210086	0.0430558		0.389711	0.0816887
ENSG00000134153_pdb	6z3w	AD	0.210142	0.0430893		0.675353	0.139487
ENSG00000124787_pdb	6ahr	AD	0.210248	0.0431228		0.134297	0.0272407
ENSG00000109111_pdb	6gmh	AD	0.210682	0.0431563		0.24512	0.0499916
ENSG00000186153_pdb	1wmv	AD	0.210709	0.0431898		0.131299	0.0264366
ENSG00000169071_pdb	4gt4	AD	0.210786	0.0432233		0.0662399	0.0139722
ENSG00000164022_pdb	1euj	AD	0.211073	0.0432568		0.172185	0.0344111
ENSG00000115488_pdb	1vcu	AD	0.211688	0.0432903		0.249758	0.0509298
ENSG00000084731_pdb	3b6v	AD	0.211713	0.0433238		0.402948	0.0847713
ENSG00000187021_pdb	2ppl	AD	0.212249	0.0433573		0.0906944	0.0183615
ENSG00000169344_pdb	6tqk	AD	0.212611	0.0433909		0.264102	0.0536773
ENSG00000183576_pdb	6ict	AD	0.213039	0.0434244		0.468903	0.0978723
ENSG00000123395_pdb	4wzg	AD	0.213121	0.0434579		0.431454	0.0902664
ENSG00000077984_pdb	2ch9	AD	0.213129	0.0434914		0.173366	0.0346792
ENSG00000214736_pdb	7cp9	AD	0.21318	0.0435249		0.449961	0.0937175
ENSG00000124593_pdb	7cp9	AD	0.21318	0.0435584		0.449963	0.093751
ENSG00000133116_pdb	5w21	AD	0.21322	0.0435919		0.335163	0.0696264
ENSG00000165471_pdb	1hup	AD	0.21334	0.0436254		0.366642	0.0765622
ENSG00000140990_pdb	5xtc	AD	0.213607	0.0436589		0.792885	0.161535
ENSG00000116863_pdb	5zqy	AD	0.213688	0.0436924		0.676601	0.139856
ENSG00000055332_pdb	1qu6	AD	0.213807	0.0437259		0.623685	0.129167
ENSG00000249967_pdb	3s5n	AD	0.213939	0.0437594		0.499805	0.104172
ENSG00000155252_pdb	3s5n	AD	0.213939	0.0437929		0.499805	0.104205
ENSG00000241935_pdb	3s5n	AD	0.213939	0.0438264		0.499806	0.104239
ENSG00000157020_pdb	3bg1	AD	0.214264	0.0438599		0.12225	0.0248283
ENSG00000169220_pdb	2jnu	AD	0.214295	0.0438934		0.361576	0.075289
ENSG00000018236_pdb	3s97	AD	0.214311	0.043927		0.227161	0.0464734
ENSG00000197408_pdb	3ibd	AD	0.214364	0.0439605		0.391243	0.0821913
ENSG00000164941_pdb	7cun	AD	0.214584	0.043994		0.256211	0.0522366
ENSG00000091844_pdb	6am3	AD	0.214622	0.0440275		0.272402	0.0562238
ENSG00000164171_pdb	5hj2	AD	0.21467	0.044061		0.119535	0.0241582
ENSG00000075043_pdb	6feg	AD	0.214793	0.0440945		0.5066	0.105478
ENSG00000198075_pdb	2gwh	AD	0.214897	0.044128		0.378053	0.0792092
ENSG00000100605_pdb	2q7d	AD	0.214944	0.0441615		0.37075	0.0774334
ENSG00000157368_pdb	4dkc	AD	0.215101	0.044195		0.067184	0.0142402
ENSG00000006712_pdb	4m6t	AD	0.215697	0.0442285		0.367602	0.0768973
ENSG00000108010_pdb	2diy	AD	0.215722	0.044262		0.447284	0.0931479
ENSG00000173273_pdb	5jhq	AD	0.216051	0.0442955		0.194046	0.0393031
ENSG00000156515_pdb	1hkb	AD	0.216168	0.044329		0.534404	0.111811
ENSG00000121807_pdb	6gpx	AD	0.216213	0.0443625		0.590345	0.123002
ENSG00000134755_pdb	5j5j	AD	0.216296	0.044396		0.266434	0.054582
ENSG00000143217_pdb	4frw	AD	0.216363	0.0444296		0.446496	0.0929134
ENSG00000059573_pdb	2h5g	AD	0.216442	0.0444631		0.76107	0.15604
ENSG00000109193_pdb	1g3m	AD	0.216458	0.0444966		0.21707	0.0447981
ENSG00000172724_pdb	2mp1	AD	0.217061	0.0445301		0.26759	0.0548501
ENSG00000139625_pdb	5cen	AD	0.217205	0.0445636		0.159108	0.0319987
ENSG00000078237_pdb	3dcy	AD	0.217563	0.0445971		0.786932	0.160596
ENSG00000134864_pdb	3juc	AD	0.217567	0.0446306		0.265271	0.0541799
ENSG00000107758_pdb	4or9	AD	0.217614	0.0446641		0.125228	0.0253644
ENSG00000182150_pdb	6hq9	AD	0.217772	0.0446976		0.0594412	0.0120623
ENSG00000089050_pdb	2qs9	AD	0.217838	0.0447311		0.330382	0.0684202
ENSG00000151498_pdb	1rx0	AD	0.218001	0.0447646		0.213043	0.0437929
ENSG00000173599_pdb	3bg3	AD	0.218263	0.0447981		0.654219	0.135333
ENSG00000085231_pdb	6f3t	AD	0.21838	0.0448316		0.573064	0.119149
ENSG00000260836_pdb	2mkh	AD	0.218718	0.0448651		0.201599	0.0409449
ENSG00000147852_pdb	6byv	AD	0.218908	0.0448986		0.171478	0.0341431
ENSG00000236404_pdb	6byv	AD	0.218908	0.0449321		0.17148	0.0341766
ENSG00000011566_pdb	5j5t	AD	0.218964	0.0449657		0.40303	0.0848383
ENSG00000163527_pdb	6s7t	AD	0.219166	0.0449992		0.117401	0.0239571
ENSG00000204305_pdb	3o3u	AD	0.219227	0.0450327		0.849599	0.173094
ENSG00000159202_pdb	5a4p	AD	0.219235	0.0450662		0.471248	0.0983079
ENSG00000125818_pdb	4ouh	AD	0.219421	0.0450997		0.264639	0.0539119
ENSG00000128802_pdb	4ycg	AD	0.219454	0.0451332		0.408235	0.0861116
ENSG00000234185_pdb	7a6h	AD	0.219466	0.0451667		0.0723996	0.0150779
ENSG00000241258_pdb	7a6h	AD	0.219466	0.0452002		0.0723996	0.0151114
ENSG00000109618_pdb	4zdo	AD	0.219492	0.0452337		0.245994	0.0501927
ENSG00000109674_pdb	7jl5	AD	0.219597	0.0452672		0.870415	0.17678
ENSG00000204217_pdb	6unp	AD	0.220035	0.0453007		0.0645588	0.0133356
ENSG00000105855_pdb	6uja	AD	0.220124	0.0453342		0.0203106	0.00432233
ENSG00000166986_pdb	5gl7	AD	0.220149	0.0453677		0.33693	0.0700285
ENSG00000137824_pdb	7cc7	AD	0.220268	0.0454012		0.156037	0.0315631
ENSG00000128563_pdb	6icz	AD	0.220434	0.0454347		0.452965	0.0942872
ENSG00000104738_pdb	6xtx	AD	0.220688	0.0454683		0.160001	0.0322667
ENSG00000196365_pdb	7nfy	AD	0.220853	0.0455018		0.117879	0.0240241
ENSG00000116254_pdb	6guu	AD	0.220886	0.0455353		0.58836	0.122634
ENSG00000108387_pdb	6wb3	AD	0.220993	0.0455688		0.326624	0.0673815
ENSG00000264672_pdb	6wb3	AD	0.220993	0.0456023		0.326624	0.067415
ENSG00000136040_pdb	6vxk	AD	0.221548	0.0456358		0.298487	0.0617189
ENSG00000146006_pdb	5z8x	AD	0.221939	0.0456693		0.46458	0.0966326
ENSG00000178607_pdb	3p23	AD	0.222026	0.0457028		0.16002	0.0323002
ENSG00000154734_pdb	2jih	AD	0.2227	0.0457363		0.2391	0.0489529
ENSG00000204308_pdb	3o3u	AD	0.222765	0.0457698		0.860472	0.175038
ENSG00000172915_pdb	1mi1	AD	0.222947	0.0458033		0.389617	0.0816217
ENSG00000249884_pdb	2gd5	AD	0.22312	0.0458368		0.226678	0.0463059
ENSG00000115561_pdb	2gd5	AD	0.22312	0.0458703		0.226679	0.0463394
ENSG00000150540_pdb	1jqd	AD	0.223295	0.0459038		0.0421025	0.00877869
ENSG00000254772_pdb	1pbu	AD	0.223358	0.0459373		0.101673	0.0209415
ENSG00000255508_pdb	1pbu	AD	0.223358	0.0459708		0.101672	0.020908
ENSG00000072201_pdb	3b76	AD	0.223414	0.0460044		0.381388	0.0799129
ENSG00000256206_pdb	4r3o	AD	0.223594	0.0460379		0.555777	0.11553
ENSG00000129084_pdb	4r3o	AD	0.223594	0.0460714		0.555777	0.115564
ENSG00000204560_pdb	5z58	AD	0.223684	0.0461049		0.153612	0.031027
ENSG00000247077_pdb	3mxo	AD	0.223767	0.0461384		0.78292	0.15996
ENSG00000176894_pdb	3mxo	AD	0.223767	0.0461719		0.782914	0.159926
ENSG00000034971_pdb	4wxq	AD	0.223931	0.0462054		0.780749	0.159357
ENSG00000182199_pdb	4pvf	AD	0.224013	0.0462389		0.163214	0.0326688
ENSG00000187486_pdb	6c3o	AD	0.224057	0.0462724		0.24377	0.0497906
ENSG00000197043_pdb	1m9i	AD	0.224114	0.0463059		0.182196	0.0368906
ENSG00000067182_pdb	1ext	AD	0.224278	0.0463394		0.882108	0.179293
ENSG00000101350_pdb	3b6u	AD	0.224325	0.0463729		0.10246	0.0210756
ENSG00000111481_pdb	2hf6	AD	0.224712	0.0464064		0.559888	0.116234
ENSG00000150867_pdb	2ybx	AD	0.224837	0.0464399		0.1217	0.0246943
ENSG00000137764_pdb	4ic7	AD	0.224942	0.0464734		0.348818	0.0726085
ENSG00000156136_pdb	1p5z	AD	0.224963	0.046507		0.118718	0.0240911
ENSG00000152495_pdb	2w4o	AD	0.22513	0.0465405		0.3511	0.0731781
ENSG00000118369_pdb	5txk	AD	0.225653	0.046574		0.319662	0.0659072
ENSG00000188342_pdb	6o9l	AD	0.225705	0.0466075		0.797972	0.162808
ENSG00000127947_pdb	5hde	AD	0.225861	0.046641		0.506874	0.105512
ENSG00000136159_pdb	7b66	AD	0.225956	0.0466745		0.714726	0.147194
ENSG00000140521_pdb	3ikm	AD	0.22598	0.046708		0.381562	0.0799464
ENSG00000124731_pdb	1q8m	AD	0.226065	0.0467415		0.0709128	0.0149104
ENSG00000167588_pdb	1wpq	AD	0.226069	0.046775		0.309101	0.0638298
ENSG00000112514_pdb	2zfh	AD	0.226159	0.0468085		0.39469	0.0828279
ENSG00000186908_pdb	3eu9	AD	0.226448	0.046842		0.268936	0.0552856
ENSG00000100122_pdb	1oki	AD	0.226638	0.0468755		0.578301	0.120556
ENSG00000164402_pdb	6upr	AD	0.226739	0.046909		0.122762	0.0248953
ENSG00000187323_pdb	5x83	AD	0.22688	0.0469425		0.369042	0.0771654
ENSG00000017797_pdb	2mbg	AD	0.227294	0.046976		0.242423	0.049556
ENSG00000268173_pdb	3mtt	AD	0.227407	0.0470095		0.613105	0.12709
ENSG00000105647_pdb	3mtt	AD	0.227407	0.0470431		0.613103	0.127056
ENSG00000101444_pdb	1a7a	AD	0.227428	0.0470766		0.561566	0.116636
ENSG00000125780_pdb	1l9m	AD	0.227634	0.0471101		0.43635	0.0913386
ENSG00000163975_pdb	6xr0	AD	0.22778	0.0471436		0.0889071	0.0179595
ENSG00000155970_pdb	6agi	AD	0.228177	0.0471771		0.410245	0.0866142
ENSG00000142230_pdb	3kyd	AD	0.228286	0.0472106		0.0987457	0.0202044
ENSG00000158481_pdb	4ono	AD	0.228313	0.0472441		0.267678	0.0548836
ENSG00000188404_pdb	3cfw	AD	0.228441	0.0472776		0.776813	0.158821
ENSG00000182901_pdb	2a72	AD	0.228689	0.0473111		0.443785	0.0925113
ENSG00000134061_pdb	3b2d	AD	0.228702	0.0473446		0.351828	0.0733456
ENSG00000173692_pdb	5ln3	AD	0.228801	0.0473781		0.412863	0.0869827
ENSG00000185085_pdb	7cun	AD	0.22894	0.0474116		0.484174	0.101223
ENSG00000111331_pdb	4s3n	AD	0.228983	0.0474451		0.823548	0.167532
ENSG00000257452_pdb	4s3n	AD	0.228983	0.0474786		0.82356	0.167566
ENSG00000104814_pdb	7kac	AD	0.229045	0.0475121		0.771327	0.157916
ENSG00000100697_pdb	5zak	AD	0.229133	0.0475457		0.253295	0.0514994
ENSG00000108518_pdb	1awi	AD	0.229357	0.0475792		0.178544	0.0358519
ENSG00000128708_pdb	2p0w	AD	0.229365	0.0476127		0.0263335	0.00566259
ENSG00000055118_pdb	5va1	AD	0.229498	0.0476462		0.418991	0.0879879
ENSG00000109610_pdb	2jlp	AD	0.229522	0.0476797		0.382181	0.0800134
ENSG00000152939_pdb	5n7k	AD	0.229575	0.0477132		0.263095	0.0534763
ENSG00000138036_pdb	6rlb	AD	0.22971	0.0477467		0.618413	0.128062
ENSG00000248710_pdb	4u4p	AD	0.229753	0.0477802		0.464323	0.0965321
ENSG00000113810_pdb	4u4p	AD	0.229753	0.0478137		0.464323	0.0965656
ENSG00000119688_pdb	6jbj	AD	0.229834	0.0478472		0.364423	0.0759926
ENSG00000258908_pdb	1m73	AD	0.230582	0.0478807		0.500182	0.104373
ENSG00000042088_pdb	1qzq	AD	0.230663	0.0479142		0.222535	0.0454347
ENSG00000134248_pdb	3msh	AD	0.230693	0.0479477		0.29603	0.0612833
ENSG00000224699_pdb	3msh	AD	0.230693	0.0479812		0.296026	0.0612498
ENSG00000186432_pdb	4uae	AD	0.230712	0.0480147		0.274081	0.0565589
ENSG00000079459_pdb	3vj8	AD	0.230774	0.0480482		0.291044	0.0601441
ENSG00000162836_pdb	4jod	AD	0.231256	0.0480818		0.0736191	0.015346
ENSG00000185008_pdb	6iaa	AD	0.231321	0.0481153		0.422579	0.0886916
ENSG00000185917_pdb	1wma	AD	0.231541	0.0481488		0.206446	0.0418496
ENSG00000159228_pdb	1wma	AD	0.231541	0.0481823		0.206446	0.0418831
ENSG00000120868_pdb	5juy	AD	0.231672	0.0482158		0.134321	0.0272743
ENSG00000167613_pdb	3kgr	AD	0.231768	0.0482493		0.584929	0.12193
ENSG00000154188_pdb	4jyo	AD	0.231776	0.0482828		0.312057	0.0645334
ENSG00000163995_pdb	1v6g	AD	0.231834	0.0483163		0.0517673	0.0106551
ENSG00000172602_pdb	2cls	AD	0.231988	0.0483498		0.933952	0.188742
ENSG00000147894_pdb	7o2w	AD	0.232121	0.0483833		0.711201	0.146825
ENSG00000222040_pdb	6k42	AD	0.232155	0.0484168		0.264606	0.0538449
ENSG00000132670_pdb	6uzt	AD	0.23219	0.0484503		0.348739	0.072508
ENSG00000213341_pdb	5ebz	AD	0.232303	0.0484838		0.188514	0.0379963
ENSG00000150768_pdb	6h55	AD	0.232533	0.0485173		0.297403	0.0615849
ENSG00000065357_pdb	6iie	AD	0.232871	0.0485508		0.0506418	0.0104205
ENSG00000168769_pdb	4nm6	AD	0.232989	0.0485844		0.406714	0.085743
ENSG00000166033_pdb	3nzi	AD	0.233001	0.0486179		0.141455	0.028648
ENSG00000196236_pdb	5x49	AD	0.233402	0.0486514		0.300778	0.0622885
ENSG00000079557_pdb	6fak	AD	0.233423	0.0486849		0.139137	0.028313
ENSG00000187240_pdb	4rh7	AD	0.233913	0.0487184		0.143492	0.0291171
ENSG00000143774_pdb	6nui	AD	0.233917	0.0487519		0.302373	0.062456
ENSG00000236304_pdb	6gff	AD	0.233928	0.0487854		0.132247	0.0266041
ENSG00000137507_pdb	6gff	AD	0.234318	0.0488189		0.132524	0.0266376
ENSG00000010803_pdb	2p0k	AD	0.234993	0.0488524		0.182445	0.0369576
ENSG00000165487_pdb	6iih	AD	0.235061	0.0488859		0.560981	0.116502
ENSG00000184076_pdb	5xte	AD	0.235158	0.0489194		0.215816	0.044396
ENSG00000113504_pdb	7d99	AD	0.235275	0.0489529		0.52568	0.109566
ENSG00000213420_pdb	6wjl	AD	0.235526	0.0489864		0.366335	0.0764952
ENSG00000197956_pdb	1k96	AD	0.235562	0.0490199		0.26176	0.0531077
ENSG00000240563_pdb	2lr6	AD	0.235574	0.0490534		0.329646	0.0682526
ENSG00000110063_pdb	1st0	AD	0.23564	0.0490869		0.0584118	0.0119283
ENSG00000157423_pdb	2e6j	AD	0.236274	0.0491205		0.949181	0.191255
ENSG00000126456_pdb	6siv	AD	0.236291	0.049154		0.0920404	0.0186966
ENSG00000104763_pdb	5u7z	AD	0.236466	0.0491875		0.322363	0.0665103
ENSG00000116478_pdb	4bkx	AD	0.23656	0.049221		0.262309	0.0532753
ENSG00000160563_pdb	7emf	AD	0.236699	0.0492545		0.201234	0.0408444
ENSG00000162434_pdb	5ixd	AD	0.236863	0.049288		0.119096	0.0241246
ENSG00000105376_pdb	4oi9	AD	0.237211	0.0493215		0.321472	0.0662758
ENSG00000221838_pdb	3l81	AD	0.237606	0.049355		0.0196985	0.00405428
ENSG00000139194_pdb	1ggl	AD	0.237776	0.0493885		0.345432	0.0716033
ENSG00000139496_pdb	5ijn	AD	0.238198	0.049422		0.163296	0.0327023
ENSG00000147459_pdb	7dpa	AD	0.238251	0.0494555		0.332949	0.0689898
ENSG00000103056_pdb	5uvg	AD	0.238256	0.049489		0.415353	0.0874518
ENSG00000197506_pdb	6ksw	AD	0.238464	0.0495225		0.61989	0.12843
ENSG00000160505_pdb	4ewi	AD	0.238575	0.049556		0.569884	0.118479
ENSG00000171747_pdb	1x50	AD	0.238615	0.0495895		0.0934348	0.0191322
ENSG00000247121_pdb	5ab0	AD	0.238677	0.0496231		0.0122104	0.00231195
ENSG00000164308_pdb	5ab0	AD	0.238677	0.0496566		0.0122109	0.00234545
ENSG00000253607_pdb	7czb	AD	0.238737	0.0496901		0.585262	0.121997
ENSG00000113140_pdb	1bmo	AD	0.239105	0.0497236		0.729326	0.150075
ENSG00000100567_pdb	6e5b	AD	0.239351	0.0497571		0.266982	0.0546825
ENSG00000139971_pdb	6e5b	AD	0.239351	0.0497906		0.266983	0.054716
ENSG00000100934_pdb	5kyn	AD	0.239557	0.0498241		0.16161	0.0324678
ENSG00000168385_pdb	6upq	AD	0.239562	0.0498576		0.137439	0.0278774
ENSG00000112282_pdb	6h02	AD	0.239568	0.0498911		0.323589	0.0667448
ENSG00000101144_pdb	1m4u	AD	0.239652	0.0499246		0.160243	0.0323337
ENSG00000238258_pdb	2qqi	AD	0.239698	0.0499581		0.261085	0.0528732
ENSG00000077522_pdb	4d1e	AD	0.240166	0.0499916		0.133907	0.0269727
ENSG00000137857_pdb	7d3e	AD	0.240326	0.0500251		0.536567	0.112247
ENSG00000166484_pdb	4ic7	AD	0.240378	0.0500586		0.212944	0.0437259
ENSG00000244734_pdb	1dxt	AD	0.24056	0.0500921		0.493232	0.103099
ENSG00000007376_pdb	5vbb	AD	0.240562	0.0501256		0.496527	0.103702
ENSG00000134057_pdb	2b9r	AD	0.240573	0.0501592		0.0158867	0.00318311
ENSG00000163481_pdb	5d1k	AD	0.240776	0.0501927		0.464117	0.0964651
ENSG00000186847_pdb	3tnu	AD	0.240846	0.0502262		0.107748	0.0223488
ENSG00000116161_pdb	1x5m	AD	0.241334	0.0502597		0.282301	0.0583012
ENSG00000164002_pdb	7lw7	AD	0.241338	0.0502932		0.37231	0.0777685
ENSG00000046889_pdb	6bnm	AD	0.241485	0.0503267		0.533065	0.111409
ENSG00000269967_pdb	5k22	AD	0.241553	0.0503602		0.229681	0.046842
ENSG00000184007_pdb	5k22	AD	0.241553	0.0503937		0.229681	0.0468085
ENSG00000124357_pdb	2ch5	AD	0.241578	0.0504272		0.0989819	0.0202379
ENSG00000198551_pdb	1war	AD	0.241663	0.0504607		0.40749	0.085944
ENSG00000102575_pdb	1war	AD	0.241663	0.0504942		0.40749	0.0859105
ENSG00000164136_pdb	2z3q	AD	0.241687	0.0505277		0.553014	0.115061
ENSG00000076685_pdb	6ddo	AD	0.24189	0.0505612		0.146661	0.0296197
ENSG00000113360_pdb	6lxd	AD	0.24205	0.0505947		0.155319	0.0313285
ENSG00000105514_pdb	2gf9	AD	0.242239	0.0506282		0.0500084	0.01032
ENSG00000065621_pdb	3q18	AD	0.242512	0.0506618		0.349414	0.072776
ENSG00000165699_pdb	7dl2	AD	0.242657	0.0506953		0.43294	0.0905679
ENSG00000137574_pdb	3gdh	AD	0.24282	0.0507288		0.510934	0.10645
ENSG00000196226_pdb	3x1s	AD	0.243039	0.0507623		0.646532	0.133959
ENSG00000177426_pdb	2lk2	AD	0.243043	0.0507958		0.0585468	0.0119618
ENSG00000182923_pdb	6csu	AD	0.243266	0.0508293		0.484114	0.101189
ENSG00000162639_pdb	5wy0	AD	0.243501	0.0508628		0.0707342	0.0148769
ENSG00000117115_pdb	4n22	AD	0.24354	0.0508963		0.106715	0.0220137
ENSG00000261448_pdb	6ej7	AD	0.24365	0.0509298		0.958763	0.19293
ENSG00000091262_pdb	6p7f	AD	0.243856	0.0509633		0.273281	0.0564584
ENSG00000198369_pdb	2jp2	AD	0.243861	0.0509968		0.330286	0.0683532
ENSG00000166323_pdb	6k9l	AD	0.244251	0.0510303		0.0492871	0.010186
ENSG00000130204_pdb	7ck6	AD	0.244362	0.0510638		0.340273	0.0704976
ENSG00000105711_pdb	6agf	AD	0.244555	0.0510973		0.370108	0.0772994
ENSG00000143365_pdb	3kyt	AD	0.244707	0.0511308		0.467995	0.0976043
ENSG00000169783_pdb	2id5	AD	0.244723	0.0511643		0.48795	0.10186
ENSG00000204371_pdb	6mm1	AD	0.244799	0.0511979		0.0646345	0.0134696
ENSG00000268583_pdb	6k9f	AD	0.244889	0.0512314		0.925209	0.187201
ENSG00000101266_pdb	1jwh	AD	0.24492	0.0512649		0.261292	0.0529737
ENSG00000131871_pdb	5kiu	AD	0.245158	0.0512984		0.257417	0.0523706
ENSG00000204632_pdb	1ydp	AD	0.24516	0.0513319		0.292862	0.0607807
ENSG00000100162_pdb	4p0t	AD	0.245176	0.0513654		0.291626	0.0603451
ENSG00000198954_pdb	6zpg	AD	0.24519	0.0513989		0.432078	0.0903669
ENSG00000268413_pdb	1hyn	AD	0.245232	0.0514324		0.275871	0.056961
ENSG00000143479_pdb	5y86	AD	0.245284	0.0514659		0.69038	0.142603
ENSG00000088256_pdb	6oij	AD	0.245535	0.0514994		0.291577	0.0602781
ENSG00000126870_pdb	6rlb	AD	0.245538	0.0515329		0.371661	0.0775674
ENSG00000197837_pdb	6l9z	AD	0.24578	0.0515664		0.0431746	0.00901324
ENSG00000213937_pdb	6ov2	AD	0.245971	0.0515999		0.806838	0.164718
ENSG00000229283_pdb	2ybt	AD	0.246164	0.0516334		0.468289	0.0976713
ENSG00000140983_pdb	5kut	AD	0.246186	0.0516669		0.182131	0.0367901
ENSG00000139351_pdb	4cpc	AD	0.246193	0.0517005		0.321859	0.0663763
ENSG00000111666_pdb	4cpc	AD	0.246193	0.051734		0.321861	0.0664098
ENSG00000140009_pdb	1u3r	AD	0.24624	0.0517675		0.842064	0.171721
ENSG00000119471_pdb	3kvo	AD	0.246287	0.051801		0.206413	0.041816
ENSG00000129991_pdb	2n7l	AD	0.246469	0.0518345		0.489707	0.102295
ENSG00000267110_pdb	2n7l	AD	0.246469	0.051868		0.489708	0.102329
ENSG00000128524_pdb	6wlz	AD	0.246655	0.0519015		0.194655	0.0394371
ENSG00000264545_pdb	5tc5	AD	0.246664	0.051935		0.272204	0.0561233
ENSG00000099810_pdb	5tc5	AD	0.246664	0.0519685		0.272204	0.0560898
ENSG00000065361_pdb	4leo	AD	0.246768	0.052002		0.663032	0.13674
ENSG00000213066_pdb	2d68	AD	0.246812	0.0520355		0.406861	0.085877
ENSG00000116731_pdb	2jv0	AD	0.246833	0.052069		0.0809058	0.0167867
ENSG00000157404_pdb	2e9w	AD	0.246847	0.0521025		0.37235	0.0778355
ENSG00000173818_pdb	4nsp	AD	0.247082	0.052136		0.460133	0.0955269
ENSG00000153201_pdb	1z5s	AD	0.247133	0.0521695		0.472877	0.09871
ENSG00000104938_pdb	1sl6	AD	0.24716	0.052203		0.287525	0.0593399
ENSG00000171316_pdb	2v0e	AD	0.247272	0.0522366		0.350338	0.0730776
ENSG00000213694_pdb	7c4s	AD	0.247768	0.0522701		0.471835	0.0984755
ENSG00000168621_pdb	2v5e	AD	0.24784	0.0523036		0.476863	0.0993801
ENSG00000249590_pdb	1olm	AD	0.248252	0.0523371		0.572285	0.118881
ENSG00000156467_pdb	5xte	AD	0.248369	0.0523706		0.216086	0.0444296
ENSG00000072756_pdb	4x4w	AD	0.24841	0.0524041		0.196797	0.0400402
ENSG00000211460_pdb	1j1j	AD	0.248502	0.0524376		0.374577	0.0781705
ENSG00000198585_pdb	2xsq	AD	0.248615	0.0524711		0.620083	0.128497
ENSG00000163251_pdb	6ww2	AD	0.248699	0.0525046		0.480449	0.100586
ENSG00000140307_pdb	5m4s	AD	0.248746	0.0525381		0.48487	0.101391
ENSG00000162409_pdb	4zhx	AD	0.248907	0.0525716		0.513333	0.10702
ENSG00000183648_pdb	5xtc	AD	0.248931	0.0526051		0.0595391	0.0121293
ENSG00000137807_pdb	3vhx	AD	0.248974	0.0526386		0.575088	0.119551
ENSG00000022355_pdb	6huk	AD	0.249113	0.0526721		0.549247	0.114525
ENSG00000166170_pdb	2d9d	AD	0.249135	0.0527056		0.240434	0.0491205
ENSG00000170989_pdb	3v2y	AD	0.249157	0.0527392		0.325103	0.0669794
ENSG00000265490_pdb	4a35	AD	0.249392	0.0527727		0.268939	0.0553191
ENSG00000005882_pdb	2btz	AD	0.249781	0.0528062		0.67603	0.139755
ENSG00000069399_pdb	1k1a	AD	0.249866	0.0528397		0.211539	0.0432233
ENSG00000135363_pdb	4kfz	AD	0.250272	0.0528732		0.161907	0.0325013
ENSG00000253549_pdb	1z93	AD	0.250285	0.0529067		0.0207179	0.00445636
ENSG00000019485_pdb	3ray	AD	0.250525	0.0529402		0.415251	0.0874183
ENSG00000162999_pdb	4d3p	AD	0.250654	0.0529737		0.26857	0.0551516
ENSG00000147853_pdb	1zd8	AD	0.250706	0.0530072		0.0888888	0.017926
ENSG00000170892_pdb	6z9u	AD	0.250748	0.0530407		0.564064	0.117306
ENSG00000102882_pdb	2zoq	AD	0.250819	0.0530742		0.264682	0.0539789
ENSG00000113615_pdb	2nup	AD	0.250831	0.0531077		0.481866	0.100854
ENSG00000119487_pdb	7lc1	AD	0.250955	0.0531412		0.253675	0.0515664
ENSG00000204472_pdb	2g2b	AD	0.251106	0.0531747		0.247483	0.0504607
ENSG00000166783_pdb	2diu	AD	0.251451	0.0532082		0.167566	0.0333389
ENSG00000159184_pdb	2cra	AD	0.251625	0.0532417		0.435368	0.091104
ENSG00000108829_pdb	4p0p	AD	0.251633	0.0532753		0.387281	0.0811191
ENSG00000154920_pdb	4p0p	AD	0.251633	0.0533088		0.387281	0.0811526
ENSG00000115641_pdb	2miu	AD	0.251801	0.0533423		0.879195	0.178656
ENSG00000130164_pdb	1n7d	AD	0.251867	0.0533758		0.235358	0.0480818
ENSG00000114200_pdb	6i2t	AD	0.252255	0.0534093		0.327693	0.06775
ENSG00000163536_pdb	3f5n	AD	0.252361	0.0534428		0.277848	0.0574971
ENSG00000138061_pdb	3pm0	AD	0.252755	0.0534763		0.56388	0.117273
ENSG00000101773_pdb	2l4z	AD	0.252921	0.0535098		0.159237	0.0320992
ENSG00000166164_pdb	2i7k	AD	0.25319	0.0535433		0.582609	0.121461
ENSG00000141391_pdb	4xzv	AD	0.253211	0.0535768		0.114022	0.023287
ENSG00000103522_pdb	3tgx	AD	0.25323	0.0536103		0.1483	0.0300218
ENSG00000156219_pdb	1rjt	AD	0.253293	0.0536438		0.0919186	0.0184956
ENSG00000169248_pdb	1rjt	AD	0.253293	0.0536773		0.0919187	0.0185291
ENSG00000169398_pdb	4gu6	AD	0.25405	0.0537108		0.0875478	0.0176914
ENSG00000136518_pdb	6ltj	AD	0.254064	0.0537443		0.23668	0.0483498
ENSG00000112290_pdb	3p8c	AD	0.254304	0.0537779		0.563854	0.117239
ENSG00000118496_pdb	2yre	AD	0.25435	0.0538114		0.0432054	0.00904674
ENSG00000163877_pdb	5z58	AD	0.254419	0.0538449		0.466515	0.0972022
ENSG00000137822_pdb	3rip	AD	0.254501	0.0538784		0.650468	0.134428
ENSG00000198055_pdb	3nyn	AD	0.254614	0.0539119		0.396883	0.08323
ENSG00000108883_pdb	5mqf	AD	0.254838	0.0539454		0.753473	0.154733
ENSG00000169021_pdb	5xte	AD	0.25484	0.0539789		0.381691	0.0799799
ENSG00000196712_pdb	6v65	AD	0.254942	0.0540124		0.425232	0.0891942
ENSG00000132256_pdb	2ecv	AD	0.254946	0.0540459		0.236073	0.0481823
ENSG00000120833_pdb	2c9w	AD	0.255037	0.0540794		0.233638	0.0477467
ENSG00000021852_pdb	3ojy	AD	0.255164	0.0541129		0.18735	0.0377283
ENSG00000169967_pdb	2npt	AD	0.25524	0.0541464		0.954873	0.192361
ENSG00000172349_pdb	1i16	AD	0.255462	0.0541799		0.568643	0.11811
ENSG00000124217_pdb	3i2v	AD	0.255527	0.0542134		0.174415	0.0350142
ENSG00000173258_pdb	1zsv	AD	0.25588	0.0542469		0.774711	0.158486
ENSG00000165732_pdb	6l5l	AD	0.25589	0.0542804		0.200375	0.0407438
ENSG00000185359_pdb	3zyq	AD	0.256044	0.054314		0.084555	0.0173563
ENSG00000100591_pdb	7dme	AD	0.25605	0.0543475		0.029657	0.00619869
ENSG00000135932_pdb	3gni	AD	0.256093	0.054381		0.302622	0.0625565
ENSG00000143119_pdb	6wvg	AD	0.256107	0.0544145		0.96693	0.194203
ENSG00000169905_pdb	5j1s	AD	0.25656	0.054448		0.704451	0.145519
ENSG00000215788_pdb	5yev	AD	0.256597	0.0544815		0.343971	0.0712012
ENSG00000145335_pdb	1xq8	AD	0.25699	0.054515		0.195283	0.0397386
ENSG00000135750_pdb	3ukm	AD	0.257008	0.0545485		0.870936	0.176914
ENSG00000163012_pdb	2dip	AD	0.257123	0.054582		0.500179	0.104339
ENSG00000104312_pdb	6gfj	AD	0.257338	0.0546155		0.0608347	0.0124644
ENSG00000100711_pdb	2rrf	AD	0.25745	0.054649		0.557233	0.115966
ENSG00000070061_pdb	5cqr	AD	0.257455	0.0546825		0.13642	0.0275088
ENSG00000164327_pdb	6zwm	AD	0.257519	0.054716		0.334417	0.0694589
ENSG00000136531_pdb	6j8e	AD	0.257584	0.0547495		0.629009	0.13024
ENSG00000140632_pdb	2uyy	AD	0.257764	0.054783		0.27753	0.0574301
ENSG00000123836_pdb	5htk	AD	0.25781	0.0548166		0.184342	0.0374267
ENSG00000088205_pdb	3ly5	AD	0.257851	0.0548501		0.680721	0.14066
ENSG00000067715_pdb	2k45	AD	0.25841	0.0548836		0.36546	0.0761602
ENSG00000164879_pdb	1z93	AD	0.258553	0.0549171		0.00933318	0.00177584
ENSG00000134086_pdb	6r7f	AD	0.258805	0.0549506		0.0448791	0.00944882
ENSG00000224643_pdb	3s4e	AD	0.259049	0.0549841		0.281857	0.0582342
ENSG00000066135_pdb	2gp3	AD	0.2591	0.0550176		0.108287	0.0224493
ENSG00000108231_pdb	5y31	AD	0.259121	0.0550511		0.314924	0.0649355
ENSG00000171189_pdb	4mf3	AD	0.259195	0.0550846		0.352723	0.0735467
ENSG00000173991_pdb	1ya5	AD	0.259346	0.0551181		0.156461	0.0316301
ENSG00000197256_pdb	4hbd	AD	0.25954	0.0551516		0.179418	0.0361535
ENSG00000073614_pdb	5v9t	AD	0.259625	0.0551851		0.315456	0.0650695
ENSG00000160716_pdb	5kxi	AD	0.25996	0.0552186		0.198116	0.0402077
ENSG00000260372_pdb	3gd8	AD	0.260044	0.0552521		0.102575	0.0211761
ENSG00000171885_pdb	3gd8	AD	0.260044	0.0552856		0.102575	0.0211426
ENSG00000196431_pdb	3lwk	AD	0.260321	0.0553191		0.364934	0.0760596
ENSG00000214517_pdb	3c5v	AD	0.260333	0.0553527		0.100537	0.020573
ENSG00000141127_pdb	2ji4	AD	0.260364	0.0553862		0.299914	0.062121
ENSG00000110651_pdb	7jic	AD	0.260451	0.0554197		0.229146	0.046775
ENSG00000179593_pdb	4nre	AD	0.26074	0.0554532		0.215772	0.0443625
ENSG00000165475_pdb	3f3s	AD	0.261038	0.0554867		0.546808	0.114089
ENSG00000167447_pdb	6l54	AD	0.261127	0.0555202		0.605472	0.12575
ENSG00000265303_pdb	6l54	AD	0.261127	0.0555537		0.605471	0.125716
ENSG00000259384_pdb	1bp3	AD	0.261655	0.0555872		0.305034	0.0631597
ENSG00000204414_pdb	1bp3	AD	0.261655	0.0556207		0.305034	0.0631262
ENSG00000163586_pdb	2f73	AD	0.261915	0.0556542		0.323302	0.0666443
ENSG00000135913_pdb	3u12	AD	0.262155	0.0556877		0.875528	0.177651
ENSG00000036549_pdb	6e+83	AD	0.262261	0.0557212		0.826291	0.16837
ENSG00000166508_pdb	6xtx	AD	0.262336	0.0557547		0.435751	0.0912046
ENSG00000179051_pdb	5gwn	AD	0.262869	0.0557882		0.0386781	0.00834311
ENSG00000121769_pdb	1g5w	AD	0.263291	0.0558217		0.182326	0.0369241
ENSG00000160789_pdb	6yjd	AD	0.263322	0.0558553		0.0904318	0.018328
ENSG00000121594_pdb	1dr9	AD	0.263372	0.0558888		0.298834	0.0617859
ENSG00000134910_pdb	6s7o	AD	0.26338	0.0559223		0.477605	0.0997487
ENSG00000198366_pdb	7mju	AD	0.263475	0.0559558		0.295285	0.0611158
ENSG00000081052_pdb	6wku	AD	0.263603	0.0559893		0.360433	0.0750209
ENSG00000104879_pdb	1i0e	AD	0.263682	0.0560228		0.623688	0.129201
ENSG00000107201_pdb	5f9f	AD	0.26381	0.0560563		0.116106	0.0236556
ENSG00000102189_pdb	1joc	AD	0.263886	0.0560898		0.435792	0.0912716
ENSG00000077097_pdb	5zad	AD	0.264107	0.0561233		0.573955	0.11945
ENSG00000164399_pdb	1jli	AD	0.264194	0.0561568		0.100901	0.02064
ENSG00000172803_pdb	6e8r	AD	0.264238	0.0561903		0.918829	0.186095
ENSG00000172757_pdb	6e8r	AD	0.264238	0.0562238		0.918829	0.186128
ENSG00000172575_pdb	4l9m	AD	0.264274	0.0562573		0.402697	0.0846708
ENSG00000140575_pdb	3fay	AD	0.264943	0.0562908		0.491941	0.103032
ENSG00000136997_pdb	6e+16	AD	0.265066	0.0563243		0.669492	0.138348
ENSG00000079841_pdb	2css	AD	0.265121	0.0563578		0.403786	0.0851064
ENSG00000164045_pdb	1c25	AD	0.265159	0.0563914		0.255847	0.052069
ENSG00000124713_pdb	1r74	AD	0.265178	0.0564249		0.73547	0.151315
ENSG00000147488_pdb	2cs8	AD	0.265322	0.0564584		0.477934	0.0998492
ENSG00000185236_pdb	2f9m	AD	0.26599	0.0564919		0.428534	0.0898978
ENSG00000268854_pdb	6z3w	AD	0.266107	0.0565254		0.173547	0.0347127
ENSG00000106245_pdb	5mqf	AD	0.266473	0.0565589		0.542547	0.113486
ENSG00000115825_pdb	2d9z	AD	0.266751	0.0565924		0.185398	0.0374602
ENSG00000112984_pdb	6yip	AD	0.266896	0.0566259		0.502611	0.104741
ENSG00000137936_pdb	3t6a	AD	0.267143	0.0566594		0.0196338	0.00398727
ENSG00000083457_pdb	6g36	AD	0.26715	0.0566929		0.287785	0.0594404
ENSG00000177602_pdb	6g36	AD	0.26715	0.0567264		0.287787	0.0594739
ENSG00000129932_pdb	4d4z	AD	0.267442	0.0567599		0.12998	0.0263026
ENSG00000182885_pdb	7d76	AD	0.267517	0.0567934		0.531968	0.111141
ENSG00000180176_pdb	2xsn	AD	0.267578	0.0568269		0.533263	0.111543
ENSG00000102974_pdb	1x6h	AD	0.267656	0.0568604		0.668385	0.138013
ENSG00000158864_pdb	5xtd	AD	0.267697	0.056894		0.245572	0.0500586
ENSG00000074842_pdb	6o6w	AD	0.26773	0.0569275		0.986874	0.197822
ENSG00000198373_pdb	5tj7	AD	0.268008	0.056961		0.190219	0.0385659
ENSG00000196344_pdb	1agn	AD	0.268188	0.0569945		0.472427	0.098643
ENSG00000260300_pdb	4f0x	AD	0.268293	0.057028		0.432513	0.0904339
ENSG00000159640_pdb	2iul	AD	0.26831	0.0570615		0.917195	0.185693
ENSG00000081277_pdb	1xm9	AD	0.268373	0.057095		0.236428	0.0482493
ENSG00000198855_pdb	6i7g	AD	0.268406	0.0571285		0.160867	0.0324007
ENSG00000076924_pdb	6ff7	AD	0.268597	0.057162		0.532704	0.111342
ENSG00000149925_pdb	1ald	AD	0.269028	0.0571955		0.694628	0.143408
ENSG00000085840_pdb	7jpo	AD	0.26903	0.057229		0.534546	0.111845
ENSG00000169860_pdb	4xnv	AD	0.269287	0.0572625		0.0481725	0.0101189
ENSG00000108576_pdb	5i6x	AD	0.269563	0.057296		0.264633	0.0538784
ENSG00000127663_pdb	4uc4	AD	0.269569	0.0573295		0.338766	0.07033
ENSG00000171611_pdb	3of6	AD	0.27001	0.057363		0.0348125	0.00730441
ENSG00000168397_pdb	2d1i	AD	0.27025	0.0573965		0.15655	0.0316636
ENSG00000198730_pdb	6gmh	AD	0.270346	0.0574301		0.391998	0.0823253
ENSG00000166813_pdb	6mlq	AD	0.270393	0.0574636		0.171909	0.0343441
ENSG00000049249_pdb	6mgp	AD	0.270409	0.0574971		0.169733	0.033808
ENSG00000167751_pdb	4nfe	AD	0.270491	0.0575306		0.105507	0.0216452
ENSG00000170515_pdb	2q8k	AD	0.270666	0.0575641		0.383602	0.080315
ENSG00000257553_pdb	2q8k	AD	0.270666	0.0575976		0.383604	0.0803485
ENSG00000168461_pdb	2fg5	AD	0.270721	0.0576311		0.22461	0.0460379
ENSG00000164451_pdb	6ytk	AD	0.270745	0.0576646		0.258255	0.0525381
ENSG00000138802_pdb	3eh1	AD	0.270951	0.0576981		0.515774	0.107355
ENSG00000162892_pdb	6df3	AD	0.27111	0.0577316		0.312992	0.0646004
ENSG00000158480_pdb	5ljm	AD	0.271219	0.0577651		0.338359	0.0702965
ENSG00000105379_pdb	1efv	AD	0.271445	0.0577986		0.375781	0.0784051
ENSG00000259081_pdb	6j4u	AD	0.271585	0.0578321		0.323487	0.0667113
ENSG00000012504_pdb	1osh	AD	0.271737	0.0578656		0.258418	0.0525716
ENSG00000237298_pdb	4qeg	AD	0.271924	0.0578991		0.371821	0.0776009
ENSG00000168393_pdb	1e2d	AD	0.272567	0.0579327		0.125888	0.0255319
ENSG00000269858_pdb	5v1b	AD	0.272854	0.0579662		0.328412	0.0679511
ENSG00000111725_pdb	6c9f	AD	0.272972	0.0579997		0.292393	0.0606467
ENSG00000196363_pdb	6e+22	AD	0.273325	0.0580332		0.288801	0.059675
ENSG00000269403_pdb	1efv	AD	0.273552	0.0580667		0.376259	0.0786731
ENSG00000125826_pdb	4dbg	AD	0.274199	0.0581002		0.2139	0.0440275
ENSG00000101412_pdb	2aze	AD	0.274199	0.0581337		0.0710916	0.0149439
ENSG00000186417_pdb	5yby	AD	0.274405	0.0581672		0.308824	0.0637628
ENSG00000126266_pdb	4phu	AD	0.274552	0.0582007		0.0741974	0.015413
ENSG00000105669_pdb	6tzt	AD	0.274602	0.0582342		0.404542	0.0853409
ENSG00000258838_pdb	4cvo	AD	0.274608	0.0582677		0.212769	0.0436924
ENSG00000243251_pdb	4cvo	AD	0.274608	0.0583012		0.212769	0.0436254
ENSG00000225830_pdb	4cvo	AD	0.274608	0.0583347		0.212769	0.0436589
ENSG00000130766_pdb	5cuf	AD	0.274784	0.0583682		0.279655	0.0577986
ENSG00000131747_pdb	6zy7	AD	0.274818	0.0584017		0.241445	0.0493885
ENSG00000104889_pdb	3puf	AD	0.275111	0.0584352		0.125364	0.0254314
ENSG00000095066_pdb	3puf	AD	0.275111	0.0584688		0.125364	0.0254649
ENSG00000076043_pdb	6n6i	AD	0.275165	0.0585023		0.258912	0.0526386
ENSG00000136146_pdb	7emf	AD	0.275195	0.0585358		0.331065	0.0687217
ENSG00000100744_pdb	1sgo	AD	0.275664	0.0585693		0.0646757	0.0135366
ENSG00000025708_pdb	1uou	AD	0.275689	0.0586028		0.208728	0.0425197
ENSG00000178695_pdb	6m8s	AD	0.27573	0.0586363		0.670099	0.138549
ENSG00000149295_pdb	6luq	AD	0.275875	0.0586698		0.512045	0.106618
ENSG00000115041_pdb	2e6w	AD	0.275971	0.0587033		0.380799	0.0797454
ENSG00000145384_pdb	1kzw	AD	0.276114	0.0587368		0.465444	0.0968671
ENSG00000116761_pdb	2nmp	AD	0.276183	0.0587703		0.499673	0.104138
ENSG00000272821_pdb	2rli	AD	0.276309	0.0588038		0.849303	0.172927
ENSG00000173327_pdb	5k26	AD	0.276361	0.0588373		0.286358	0.0590719
ENSG00000135341_pdb	2eva	AD	0.276721	0.0588708		0.304384	0.0628916
ENSG00000165238_pdb	6elm	AD	0.276863	0.0589043		0.549083	0.114492
ENSG00000126858_pdb	5ksz	AD	0.276962	0.0589378		0.181825	0.0366561
ENSG00000110047_pdb	2jq6	AD	0.276965	0.0589714		0.546448	0.114056
ENSG00000144909_pdb	2d9x	AD	0.277139	0.0590049		0.176239	0.0353828
ENSG00000260467_pdb	7d76	AD	0.277633	0.0590384		0.612386	0.126822
ENSG00000125885_pdb	7dp3	AD	0.277793	0.0590719		0.975721	0.196113
ENSG00000188906_pdb	7lhw	AD	0.278018	0.0591054		0.372558	0.077869
ENSG00000185046_pdb	2kiv	AD	0.278252	0.0591389		0.469714	0.0980064
ENSG00000273025_pdb	2dgq	AD	0.278314	0.0591724		0.0421955	0.0088457
ENSG00000140488_pdb	2dgq	AD	0.278314	0.0592059		0.0421955	0.0088122
ENSG00000166527_pdb	2ls8	AD	0.278335	0.0592394		0.0422205	0.00887921
ENSG00000126883_pdb	2oit	AD	0.278361	0.0592729		0.857623	0.174401
ENSG00000186792_pdb	6nas	AD	0.278421	0.0593064		0.529116	0.110571
ENSG00000243477_pdb	6nas	AD	0.278421	0.0593399		0.529116	0.110605
ENSG00000140379_pdb	2vm6	AD	0.278629	0.0593734		0.587544	0.122466
ENSG00000197746_pdb	1m12	AD	0.278638	0.0594069		0.54556	0.113888
ENSG00000185339_pdb	2bb5	AD	0.278701	0.0594404		0.125273	0.0253979
ENSG00000056558_pdb	5e1t	AD	0.278866	0.0594739		0.517984	0.107958
ENSG00000100418_pdb	3ebq	AD	0.279173	0.0595075		0.461945	0.0961635
ENSG00000162736_pdb	5a63	AD	0.279207	0.059541		0.406149	0.085676
ENSG00000081026_pdb	3soe	AD	0.27932	0.0595745		0.200789	0.0408109
ENSG00000169252_pdb	6kr8	AD	0.279578	0.059608		0.87516	0.177517
ENSG00000166278_pdb	2i6q	AD	0.279788	0.0596415		0.0575006	0.0116938
ENSG00000243649_pdb	2i6q	AD	0.279788	0.059675		0.0575005	0.0116602
ENSG00000244255_pdb	2i6q	AD	0.279788	0.0597085		0.0575017	0.0117273
ENSG00000163113_pdb	5lrv	AD	0.279873	0.059742		0.812342	0.165723
ENSG00000090534_pdb	1v7m	AD	0.280125	0.0597755		0.415876	0.0875188
ENSG00000100448_pdb	1au8	AD	0.280754	0.059809		0.257921	0.0524376
ENSG00000101605_pdb	2y25	AD	0.280858	0.0598425		0.526107	0.109667
ENSG00000140374_pdb	1efv	AD	0.280924	0.059876		0.264217	0.0537443
ENSG00000254905_pdb	2ndh	AD	0.281168	0.0599095		0.636182	0.131647
ENSG00000132394_pdb	5izl	AD	0.281182	0.059943		0.519712	0.108293
ENSG00000129315_pdb	2pk2	AD	0.281571	0.0599765		0.382213	0.0800804
ENSG00000137825_pdb	1w2c	AD	0.281816	0.0600101		0.509787	0.106081
ENSG00000102572_pdb	3a7f	AD	0.282022	0.0600436		0.351894	0.0734126
ENSG00000197122_pdb	1fmk	AD	0.282414	0.0600771		0.495747	0.103602
ENSG00000078328_pdb	4zka	AD	0.282524	0.0601106		0.0787002	0.0161836
ENSG00000116539_pdb	3ope	AD	0.282823	0.0601441		0.470169	0.0981069
ENSG00000153002_pdb	1kwm	AD	0.282855	0.0601776		0.201872	0.0410789
ENSG00000178409_pdb	5jno	AD	0.282899	0.0602111		0.676993	0.139956
ENSG00000127220_pdb	3j7y	AD	0.28308	0.0602446		0.211181	0.0431228
ENSG00000130312_pdb	3j7y	AD	0.28308	0.0602781		0.211182	0.0431563
ENSG00000100714_pdb	1a4i	AD	0.283089	0.0603116		0.106439	0.0219467
ENSG00000114956_pdb	2ocp	AD	0.28328	0.0603451		0.240468	0.049154
ENSG00000171824_pdb	3saf	AD	0.283295	0.0603786		0.734813	0.151181
ENSG00000171723_pdb	1jlj	AD	0.283988	0.0604121		0.202218	0.0411124
ENSG00000225602_pdb	3jbz	AD	0.284071	0.0604456		0.744904	0.152923
ENSG00000196616_pdb	1deh	AD	0.284298	0.0604791		0.0878372	0.0177919
ENSG00000086475_pdb	3fd5	AD	0.284407	0.0605126		0.530972	0.110973
ENSG00000168546_pdb	5mr4	AD	0.284592	0.0605462		0.111664	0.0229184
ENSG00000166710_pdb	3s6c	AD	0.284793	0.0605797		0.767911	0.157112
ENSG00000160753_pdb	4giw	AD	0.284846	0.0606132		0.628822	0.130173
ENSG00000174547_pdb	3j7y	AD	0.285021	0.0606467		0.351229	0.0732116
ENSG00000123213_pdb	5luz	AD	0.285246	0.0606802		0.573184	0.119216
ENSG00000090054_pdb	6m4n	AD	0.285352	0.0607137		0.211683	0.0432568
ENSG00000101413_pdb	4hfg	AD	0.285586	0.0607472		0.343859	0.0711342
ENSG00000162711_pdb	6npy	AD	0.285597	0.0607807		0.969711	0.194874
ENSG00000136231_pdb	6fq1	AD	0.285891	0.0608142		0.655551	0.135534
ENSG00000172156_pdb	1eot	AD	0.286007	0.0608477		0.709134	0.146557
ENSG00000165092_pdb	4wb9	AD	0.286175	0.0608812		0.148395	0.0300888
ENSG00000163218_pdb	2eav	AD	0.286484	0.0609147		0.271293	0.0556877
ENSG00000130787_pdb	1r0d	AD	0.286648	0.0609482		0.173808	0.0347797
ENSG00000166123_pdb	3ihj	AD	0.286653	0.0609817		0.491806	0.102898
ENSG00000196482_pdb	1kv6	AD	0.287062	0.0610152		0.477711	0.0997822
ENSG00000203737_pdb	6li1	AD	0.287155	0.0610488		0.650542	0.134461
ENSG00000165023_pdb	2erx	AD	0.287399	0.0610823		0.0575575	0.0117608
ENSG00000138294_pdb	2iz3	AD	0.287545	0.0611158		0.431953	0.0903334
ENSG00000167286_pdb	6jxr	AD	0.287565	0.0611493		0.497945	0.103904
ENSG00000260465_pdb	6f1t	AD	0.287629	0.0611828		0.843375	0.171955
ENSG00000065000_pdb	4afi	AD	0.28794	0.0612163		0.719072	0.148166
ENSG00000151414_pdb	2wqm	AD	0.288027	0.0612498		0.0877134	0.0177249
ENSG00000137200_pdb	4n48	AD	0.288382	0.0612833		0.312153	0.0645669
ENSG00000012124_pdb	5vkj	AD	0.288468	0.0613168		0.467287	0.0974033
ENSG00000156831_pdb	2yu4	AD	0.288517	0.0613503		0.568799	0.118211
ENSG00000129562_pdb	6s7o	AD	0.288554	0.0613838		0.406759	0.0858435
ENSG00000116698_pdb	1ya0	AD	0.288556	0.0614173		0.947718	0.190953
ENSG00000158825_pdb	1mq0	AD	0.288757	0.0614508		0.519915	0.108326
ENSG00000150054_pdb	3lra	AD	0.288928	0.0614843		0.41171	0.0867482
ENSG00000104325_pdb	1w6u	AD	0.288938	0.0615178		0.199325	0.0405093
ENSG00000108671_pdb	5gjq	AD	0.288969	0.0615513		0.758878	0.155771
ENSG00000166598_pdb	4nh9	AD	0.289165	0.0615849		0.31894	0.0657061
ENSG00000184752_pdb	5xtb	AD	0.289193	0.0616184		0.532461	0.111275
ENSG00000154144_pdb	2wzo	AD	0.289272	0.0616519		0.313014	0.0646339
ENSG00000162341_pdb	6nq0	AD	0.289301	0.0616854		0.363149	0.075557
ENSG00000166851_pdb	3fvh	AD	0.289454	0.0617189		0.479983	0.100553
ENSG00000163161_pdb	6nmi	AD	0.289776	0.0617524		0.173857	0.0348132
ENSG00000039123_pdb	6ieh	AD	0.289832	0.0617859		0.430973	0.0901994
ENSG00000235910_pdb	3k2s	AD	0.289843	0.0618194		0.705131	0.145586
ENSG00000149968_pdb	1slm	AD	0.290024	0.0618529		0.317664	0.0655051
ENSG00000041880_pdb	3c49	AD	0.290026	0.0618864		0.282757	0.0584688
ENSG00000137106_pdb	2gcg	AD	0.290199	0.0619199		0.0770057	0.0158486
ENSG00000103150_pdb	4f0x	AD	0.290241	0.0619534		0.472382	0.098576
ENSG00000010810_pdb	2dq7	AD	0.29033	0.0619869		0.255427	0.051868
ENSG00000109654_pdb	7b2r	AD	0.290487	0.0620204		0.26114	0.0529067
ENSG00000222047_pdb	1owe	AD	0.290578	0.0620539		0.428182	0.0897303
ENSG00000122861_pdb	1owe	AD	0.290578	0.0620875		0.428182	0.0896968
ENSG00000171560_pdb	3ghg	AD	0.290643	0.062121		0.564571	0.117373
ENSG00000170185_pdb	4rxx	AD	0.290652	0.0621545		0.517202	0.107623
ENSG00000211445_pdb	2r37	AD	0.291067	0.062188		0.526796	0.109801
ENSG00000122779_pdb	3o33	AD	0.291099	0.0622215		0.19929	0.0404758
ENSG00000080493_pdb	6caa	AD	0.291229	0.062255		0.419622	0.0881555
ENSG00000006459_pdb	3kv5	AD	0.291363	0.0622885		0.0500343	0.0103535
ENSG00000160294_pdb	4dhx	AD	0.291468	0.062322		0.0898725	0.018194
ENSG00000113088_pdb	1mza	AD	0.291474	0.0623555		0.408707	0.0862121
ENSG00000244005_pdb	5usr	AD	0.291562	0.062389		0.313253	0.064701
ENSG00000230532_pdb	2zme	AD	0.291585	0.0624225		0.52739	0.109935
ENSG00000078043_pdb	4fo9	AD	0.291607	0.062456		0.434392	0.0908695
ENSG00000143320_pdb	1blr	AD	0.291616	0.0624895		0.124421	0.0251298
ENSG00000159409_pdb	2dno	AD	0.291634	0.062523		0.576191	0.11992
ENSG00000119541_pdb	1xwi	AD	0.291771	0.0625565		0.114537	0.023421
ENSG00000154027_pdb	2bwj	AD	0.291869	0.06259		0.424537	0.0890266
ENSG00000129214_pdb	1d2s	AD	0.29202	0.0626236		0.661603	0.136472
ENSG00000144724_pdb	2nlk	AD	0.292366	0.0626571		0.287515	0.0592729
ENSG00000254673_pdb	1jcq	AD	0.292474	0.0626906		0.786912	0.160529
ENSG00000122870_pdb	6gy4	AD	0.292741	0.0627241		0.745104	0.152957
ENSG00000163563_pdb	5h7q	AD	0.292829	0.0627576		0.426005	0.0892947
ENSG00000150630_pdb	2x1w	AD	0.29302	0.0627911		0.53161	0.11104
ENSG00000107341_pdb	6nyo	AD	0.293052	0.0628246		0.0204972	0.00442285
ENSG00000099821_pdb	6erp	AD	0.293106	0.0628581		0.554532	0.11543
ENSG00000188820_pdb	6ytv	AD	0.293564	0.0628916		0.517797	0.107857
ENSG00000244158_pdb	6ytv	AD	0.293564	0.0629251		0.517795	0.107824
ENSG00000107282_pdb	1u3b	AD	0.293583	0.0629586		0.157609	0.0318311
ENSG00000130812_pdb	6y43	AD	0.293802	0.0629921		0.208051	0.0421511
ENSG00000183386_pdb	2cuq	AD	0.294425	0.0630256		0.780842	0.159424
ENSG00000167614_pdb	7p5j	AD	0.294435	0.0630591		0.622285	0.128933
ENSG00000224855_pdb	6jtg	AD	0.294756	0.0630926		0.310063	0.0641313
ENSG00000133884_pdb	5b79	AD	0.295355	0.0631262		0.129673	0.026202
ENSG00000229314_pdb	3kq0	AD	0.295444	0.0631597		0.105278	0.0215782
ENSG00000183814_pdb	6c48	AD	0.295456	0.0631932		0.817326	0.166628
ENSG00000145365_pdb	4ym4	AD	0.295558	0.0632267		0.578678	0.12069
ENSG00000174442_pdb	3if8	AD	0.295681	0.0632602		0.484012	0.101156
ENSG00000110492_pdb	1mkn	AD	0.295807	0.0632937		0.30115	0.062322
ENSG00000206249_pdb	1bp1	AD	0.295959	0.0633272		0.585522	0.12203
ENSG00000143222_pdb	2k07	AD	0.296081	0.0633607		0.513579	0.107154
ENSG00000224985_pdb	2k07	AD	0.296081	0.0633942		0.513577	0.10712
ENSG00000188191_pdb	4din	AD	0.296675	0.0634277		0.449383	0.093617
ENSG00000123908_pdb	4w5n	AD	0.296811	0.0634612		0.530684	0.110906
ENSG00000166889_pdb	2xer	AD	0.29698	0.0634947		0.181788	0.0366225
ENSG00000198691_pdb	7e7i	AD	0.297058	0.0635282		0.0343537	0.00720389
ENSG00000050438_pdb	5jho	AD	0.297286	0.0635617		0.389255	0.0815547
ENSG00000172340_pdb	6wcv	AD	0.297315	0.0635952		0.356516	0.0743508
ENSG00000232754_pdb	5xzc	AD	0.297467	0.0636287		0.593137	0.123438
ENSG00000126261_pdb	3kyc	AD	0.297532	0.0636623		0.485538	0.101592
ENSG00000160224_pdb	1xwh	AD	0.297565	0.0636958		0.298844	0.0618529
ENSG00000069869_pdb	4bbn	AD	0.297794	0.0637293		0.26484	0.0540794
ENSG00000034693_pdb	3ajb	AD	0.297807	0.0637628		0.678059	0.140258
ENSG00000268361_pdb	1xna	AD	0.297962	0.0637963		0.515362	0.107321
ENSG00000112079_pdb	6bxi	AD	0.298004	0.0638298		0.412346	0.0868822
ENSG00000147588_pdb	3nr3	AD	0.298046	0.0638633		0.569435	0.118445
ENSG00000167548_pdb	6o7g	AD	0.298113	0.0638968		0.9297	0.187971
ENSG00000197561_pdb	4nzl	AD	0.298168	0.0639303		0.408738	0.0862456
ENSG00000108064_pdb	3tq6	AD	0.298334	0.0639638		0.365326	0.0761267
ENSG00000164902_pdb	2xc7	AD	0.29836	0.0639973		0.274267	0.0565924
ENSG00000236432_pdb	6wku	AD	0.298458	0.0640308		0.518448	0.108025
ENSG00000169031_pdb	6wku	AD	0.298458	0.0640643		0.518448	0.107991
ENSG00000140945_pdb	2v37	AD	0.298681	0.0640978		0.337124	0.070062
ENSG00000196914_pdb	1txd	AD	0.298858	0.0641313		0.520793	0.108561
ENSG00000169371_pdb	3nbz	AD	0.298862	0.0641649		0.156067	0.0315966
ENSG00000103528_pdb	2enp	AD	0.299025	0.0641984		0.814175	0.166024
ENSG00000141736_pdb	1n8z	AD	0.29924	0.0642319		0.10023	0.0205059
ENSG00000153956_pdb	7mix	AD	0.299261	0.0642654		0.722433	0.148802
ENSG00000196511_pdb	3s4y	AD	0.299289	0.0642989		0.347509	0.0722064
ENSG00000170180_pdb	1afo	AD	0.299522	0.0643324		0.266198	0.054448
ENSG00000248828_pdb	1afo	AD	0.299522	0.0643659		0.266198	0.0544815
ENSG00000250361_pdb	1afo	AD	0.299522	0.0643994		0.266198	0.0544145
ENSG00000070808_pdb	3soa	AD	0.299708	0.0644329		0.134715	0.0273748
ENSG00000168944_pdb	6flk	AD	0.299832	0.0644664		0.15601	0.0315296
ENSG00000124212_pdb	2iag	AD	0.299924	0.0644999		0.304535	0.0629251
ENSG00000203740_pdb	5ubb	AD	0.300226	0.0645334		0.2663	0.054515
ENSG00000062650_pdb	4k6j	AD	0.300448	0.0645669		0.384161	0.080516
ENSG00000256500_pdb	3nf1	AD	0.300832	0.0646004		0.849604	0.173161
ENSG00000126214_pdb	3nf1	AD	0.300832	0.0646339		0.849604	0.173128
ENSG00000135114_pdb	4xq7	AD	0.300857	0.0646674		0.461962	0.096197
ENSG00000154803_pdb	6ulg	AD	0.301265	0.064701		0.294864	0.0610152
ENSG00000264187_pdb	6ulg	AD	0.301265	0.0647345		0.294864	0.0610488
ENSG00000130695_pdb	5oi7	AD	0.301551	0.064768		0.373401	0.0780365
ENSG00000162607_pdb	7ay1	AD	0.30163	0.0648015		0.651504	0.134796
ENSG00000101188_pdb	6osa	AD	0.301824	0.064835		0.728874	0.149975
ENSG00000169155_pdb	2csh	AD	0.301975	0.0648685		0.183084	0.0372927
ENSG00000150637_pdb	6isb	AD	0.301992	0.064902		0.574511	0.119484
ENSG00000138443_pdb	3p8c	AD	0.302071	0.0649355		0.501833	0.104607
ENSG00000113161_pdb	1dq8	AD	0.302091	0.064969		0.380487	0.0797118
ENSG00000169760_pdb	5oj6	AD	0.30233	0.0650025		0.540513	0.113218
ENSG00000101425_pdb	1bp1	AD	0.302494	0.065036		0.627215	0.129837
ENSG00000142252_pdb	1y96	AD	0.302588	0.0650695		0.317904	0.0655721
ENSG00000162896_pdb	2ocw	AD	0.302649	0.065103		0.094655	0.0194672
ENSG00000174243_pdb	3jcr	AD	0.302702	0.0651365		0.315417	0.065036
ENSG00000125845_pdb	1es7	AD	0.302851	0.06517		0.275952	0.0569945
ENSG00000122543_pdb	1ttx	AD	0.302857	0.0652036		0.91323	0.185056
ENSG00000073605_pdb	5tib	AD	0.303105	0.0652371		0.1719	0.0343106
ENSG00000261701_pdb	4wjg	AD	0.303427	0.0652706		0.235017	0.0479477
ENSG00000257017_pdb	4wjg	AD	0.303427	0.0653041		0.235017	0.0479142
ENSG00000140830_pdb	4wjg	AD	0.303427	0.0653376		0.235016	0.0478807
ENSG00000101213_pdb	5d7v	AD	0.303532	0.0653711		0.64607	0.133825
ENSG00000186472_pdb	1ujd	AD	0.304399	0.0654046		0.242096	0.049489
ENSG00000197912_pdb	2qz4	AD	0.304419	0.0654381		0.544246	0.113687
ENSG00000132964_pdb	4crl	AD	0.304484	0.0654716		0.371942	0.077668
ENSG00000198917_pdb	4rg1	AD	0.304517	0.0655051		0.270381	0.0555202
ENSG00000119630_pdb	1fzv	AD	0.304572	0.0655386		0.333988	0.0693919
ENSG00000142182_pdb	2pv0	AD	0.304848	0.0655721		0.575031	0.119518
ENSG00000104321_pdb	6pqp	AD	0.305004	0.0656056		0.729842	0.150243
ENSG00000235531_pdb	6pqp	AD	0.305004	0.0656391		0.729842	0.150276
ENSG00000151790_pdb	5ti9	AD	0.305071	0.0656726		0.411312	0.0867147
ENSG00000147889_pdb	1a5e	AD	0.305161	0.0657061		0.210578	0.0429553
ENSG00000025434_pdb	3ipu	AD	0.305192	0.0657397		0.0682493	0.0144078
ENSG00000257808_pdb	2jis	AD	0.305307	0.0657732		0.0826736	0.0170548
ENSG00000197249_pdb	1atu	AD	0.305352	0.0658067		0.821821	0.167231
ENSG00000171453_pdb	7a6h	AD	0.305525	0.0658402		0.431236	0.0902329
ENSG00000167193_pdb	2eyz	AD	0.305994	0.0658737		0.58429	0.121829
ENSG00000204264_pdb	5l5a	AD	0.306259	0.0659072		0.0961638	0.0197353
ENSG00000264785_pdb	3sza	AD	0.306693	0.0659407		0.348601	0.0724074
ENSG00000162437_pdb	1wg1	AD	0.306695	0.0659742		0.426311	0.0893617
ENSG00000175287_pdb	2opw	AD	0.307492	0.0660077		0.0611629	0.0125649
ENSG00000184489_pdb	1r6h	AD	0.307512	0.0660412		0.969892	0.194941
ENSG00000132313_pdb	3j7y	AD	0.307681	0.0660747		0.492277	0.103066
ENSG00000121621_pdb	5oam	AD	0.307858	0.0661082		0.317198	0.0653711
ENSG00000205835_pdb	5c9n	AD	0.308576	0.0661417		0.263218	0.0535433
ENSG00000134996_pdb	3ehq	AD	0.30864	0.0661752		0.461023	0.0957614
ENSG00000130427_pdb	1buy	AD	0.308673	0.0662087		0.570963	0.11878
ENSG00000266728_pdb	2eak	AD	0.308729	0.0662423		0.794296	0.161937
ENSG00000271092_pdb	2ebk	AD	0.309026	0.0662758		0.143874	0.0291841
ENSG00000122481_pdb	2ebk	AD	0.309026	0.0663093		0.143874	0.0292176
ENSG00000100138_pdb	1e7k	AD	0.309174	0.0663428		0.576579	0.120188
ENSG00000135945_pdb	3gqc	AD	0.309249	0.0663763		0.510564	0.106316
ENSG00000186625_pdb	5zqm	AD	0.30932	0.0664098		0.884631	0.179796
ENSG00000167749_pdb	6kbr	AD	0.309353	0.0664433		0.243288	0.0496901
ENSG00000164978_pdb	1xsa	AD	0.30941	0.0664768		0.0627266	0.0129
ENSG00000115504_pdb	6zsh	AD	0.309428	0.0665103		0.54758	0.114324
ENSG00000139613_pdb	6lth	AD	0.309524	0.0665438		0.358166	0.0745854
ENSG00000259332_pdb	3hxt	AD	0.309554	0.0665773		0.613545	0.127325
ENSG00000136371_pdb	3hxt	AD	0.309554	0.0666108		0.613541	0.127291
ENSG00000090020_pdb	7dsx	AD	0.309634	0.0666443		0.026308	0.00562908
ENSG00000117525_pdb	1ahw	AD	0.309655	0.0666778		0.717346	0.147797
ENSG00000198719_pdb	4xbm	AD	0.3098	0.0667113		0.697338	0.143877
ENSG00000249141_pdb	3t0o	AD	0.309929	0.0667448		0.591029	0.123136
ENSG00000026297_pdb	3t0o	AD	0.309929	0.0667784		0.591029	0.123103
ENSG00000122591_pdb	5dse	AD	0.310033	0.0668119		0.379544	0.0795443
ENSG00000094880_pdb	4ui9	AD	0.310092	0.0668454		0.575455	0.119652
ENSG00000143387_pdb	1by8	AD	0.310321	0.0668789		0.642661	0.133289
ENSG00000125755_pdb	3ods	AD	0.310387	0.0669124		0.153733	0.0310605
[truncated: 3,972 more rows]

## Sheet: Supplemental_ Table_ S3
Supplemental Table S3. Full results for ADSP WES Discovery dataset with Alpha Fold2 structures.
			Model 0			Model 1
gene	pdb	pheno	pval	fdr		pval	fdr
ENSG00000095970_af	Q9NZC2	AD	3.24466e-07	1.14613e-05		0.0068859	0.00155874
ENSG00000205436_af	Q17RC7	AD	2.50433e-05	2.29226e-05		0.000353421	9.16905e-05
ENSG00000236398_af	P59534	AD	3.01219e-05	3.4384e-05		0.000655689	0.000183381
ENSG00000037474_af	Q08J23	AD	7.43695e-05	4.58453e-05		0.0732154	0.0158395
ENSG00000075234_af	Q5R3I4	AD	0.000110132	5.73066e-05		3.84073e-05	2.29226e-05
ENSG00000235724_af	Q92844	AD	0.000142751	6.87679e-05		0.0258916	0.00584527
ENSG00000136560_af	Q92844	AD	0.000243028	8.02292e-05		0.0390126	0.0085616
ENSG00000186448_af	O14709	AD	0.000252402	9.16905e-05		0.014305	0.00317479
ENSG00000068097_af	Q6AI08	AD	0.000342686	0.000103152		0.0487677	0.0107393
ENSG00000137642_af	Q92673	AD	0.000461187	0.000114613		0.000939202	0.000240688
ENSG00000182578_af	P07333	AD	0.000534912	0.000126074		0.00290474	0.000653295
ENSG00000015475_af	P55957	AD	0.00059442	0.000137536		0.00918116	0.00199427
ENSG00000168078_af	Q96KB5	AD	0.000598611	0.000148997		0.00839555	0.00182235
ENSG00000157426_af	Q4L235	AD	0.000764178	0.000160458		0.0126096	0.00276218
ENSG00000115221_af	P18564	AD	0.00100994	0.00017192		0.0034367	0.00077937
ENSG00000013523_af	Q9UNK9	AD	0.00109976	0.000183381		0.00197896	0.00043553
ENSG00000132199_af	Q7L5Y1	AD	0.0012256	0.000194842		0.00364538	0.000848138
ENSG00000034533_af	Q2TB18	AD	0.00122677	0.000206304		6.03563e-05	3.4384e-05
ENSG00000157856_af	Q96MC2	AD	0.00127934	0.000217765		0.157563	0.0338567
ENSG00000180357_af	O15014	AD	0.00128912	0.000229226		0.000798615	0.000206304
ENSG00000198924_af	Q6PJP8	AD	0.00143185	0.000240688		0.0032652	0.000722063
ENSG00000237781_af	Q6UY14	AD	0.001601	0.000252149		0.00609684	0.00139828
ENSG00000109452_af	O15327	AD	0.0016151	0.00026361		0.015922	0.00344986
ENSG00000165072_af	Q7Z304	AD	0.00161974	0.000275072		0.00561202	0.00128367
ENSG00000134253_af	Q9H8W5	AD	0.00162766	0.000286533		0.00869023	0.00190258
ENSG00000204706_af	Q7Z304	AD	0.00165207	0.000297994		0.00497099	0.00116905
ENSG00000140382_af	Q9NP66	AD	0.00167341	0.000309456		0.0521704	0.0115759
ENSG00000091986_af	Q76M96	AD	0.00172153	0.000320917		0.021024	0.00472206
ENSG00000248896_af	Q96BK5	AD	0.00174274	0.000332378		0.00214188	0.000481375
ENSG00000148057_af	Q5T6J7	AD	0.00177767	0.00034384		0.0647226	0.0138797
ENSG00000144468_af	Q8TEB9	AD	0.00185115	0.000355301		0.000355363	0.000103152
ENSG00000198089_af	A8K8P3	AD	0.00185704	0.000366762		0.000869764	0.000229226
ENSG00000196263_af	Q9BX82	AD	0.00202881	0.000378223		0.000108536	5.73066e-05
ENSG00000153975_af	Q96AP4	AD	0.002065	0.000389685		0.0018926	0.000412607
ENSG00000137501_af	Q9HCH5	AD	0.00217277	0.000401146		0.000827845	0.000217765
ENSG00000100412_af	Q99798	AD	0.00217941	0.000412607		0.0230543	0.00522636
ENSG00000170855_af	O43715	AD	0.00224991	0.000424069		0.0328112	0.00736963
ENSG00000181234_af	Q8N3T6	AD	0.00226763	0.00043553		0.00120446	0.000286533
ENSG00000231068_af	Q3LHN1	AD	0.00230891	0.000446991		0.228886	0.0484699
ENSG00000050438_af	Q2Y0W8	AD	0.00245811	0.000458453		0.072787	0.0157593
ENSG00000188522_af	A6ND36	AD	0.00255475	0.000469914		0.00105475	0.000252149
ENSG00000154025_af	A6ND36	AD	0.00255475	0.000481375		0.00105475	0.00026361
ENSG00000121864_af	Q9UID6	AD	0.00257898	0.000492837		0.0110086	0.00238395
ENSG00000120242_af	P32881	AD	0.00260837	0.000504298		0.0118368	0.00261318
ENSG00000055483_af	Q9P275	AD	0.00267231	0.000515759		0.247156	0.0519885
ENSG00000230730_af	Q6P1J6	AD	0.00288899	0.000527221		0.0230118	0.0052149
ENSG00000148680_af	P34969	AD	0.00289555	0.000538682		0.00202704	0.000446991
ENSG00000167034_af	Q99801	AD	0.00292062	0.000550143		0.0280553	0.00632665
ENSG00000159763_af	P12273	AD	0.0030327	0.000561605		0.00416197	0.000974212
ENSG00000214706_af	Q12894	AD	0.00305471	0.000573066		0.00599946	0.00135244
ENSG00000111907_af	Q16890	AD	0.00313251	0.000584527		0.00121357	0.000297994
ENSG00000223609_af	P02042	AD	0.0031795	0.000595989		0.00807665	0.0017192
ENSG00000163565_af	Q16666	AD	0.00318816	0.00060745		0.367332	0.0769169
ENSG00000100485_af	Q07890	AD	0.0032519	0.000618911		0.0207826	0.00460745
ENSG00000131462_af	P23258	AD	0.00335779	0.000630372		0.00611336	0.00140974
ENSG00000105993_af	O75190	AD	0.00338026	0.000641834		0.000486765	0.000137536
ENSG00000123739_af	Q9BZM1	AD	0.00351038	0.000653295		0.00297071	0.000664756
ENSG00000113946_af	Q9Y5I7	AD	0.00358425	0.000664756		0.0266194	0.00598281
ENSG00000170231_af	P51161	AD	0.00366757	0.000676218		0.217238	0.0460974
ENSG00000161813_af	Q71RC2	AD	0.00369204	0.000687679		0.025403	0.00569628
ENSG00000175518_af	Q8IYU4	AD	0.00376055	0.00069914		0.0147832	0.0032894
ENSG00000142327_af	Q9HAU8	AD	0.00376751	0.000710602		0.00681835	0.00152436
ENSG00000103742_af	Q8TDY8	AD	0.00377345	0.000722063		0.166502	0.0355072
ENSG00000180263_af	Q6ZV73	AD	0.00379226	0.000733524		0.0111641	0.00241834
ENSG00000163624_af	Q92903	AD	0.0037983	0.000744986		0.0412991	0.00903152
ENSG00000108798_af	Q9P2A4	AD	0.00385296	0.000756447		0.0549489	0.0121146
ENSG00000235085_af	Q8IZL8	AD	0.0038551	0.000767908		0.00956659	0.00201719
ENSG00000236283_af	Q9NY46	AD	0.00399813	0.00077937		0.0214734	0.00491691
ENSG00000100490_af	Q00532	AD	0.00411896	0.000790831		0.011348	0.0024298
ENSG00000153253_af	Q9NY46	AD	0.0041735	0.000802292		0.0199986	0.00440115
ENSG00000226761_af	P59540	AD	0.00430637	0.000813754		0.022951	0.00518052
ENSG00000189007_af	Q7Z6V5	AD	0.00437225	0.000825215		0.0329736	0.00738109
ENSG00000182985_af	Q9BY67	AD	0.00457626	0.000836676		0.0700981	0.0151633
ENSG00000204952_af	Q5MNV8	AD	0.00458028	0.000848138		0.0376405	0.00836676
ENSG00000253736_af	P28562	AD	0.00462674	0.000859599		0.0221272	0.00503152
ENSG00000120129_af	P28562	AD	0.00462674	0.00087106		0.0221255	0.00502006
ENSG00000130159_af	Q9BQ95	AD	0.00465799	0.000882521		0.00442368	0.0010659
ENSG00000118849_af	P49788	AD	0.00471014	0.000893983		0.0356199	0.00786246
ENSG00000110801_af	O00233	AD	0.00477851	0.000905444		0.00370661	0.000882521
ENSG00000256950_af	O00233	AD	0.00477851	0.000916905		0.00370661	0.00087106
ENSG00000062716_af	Q96GC9	AD	0.00479942	0.000928367		0.0049315	0.00113467
ENSG00000185008_af	Q9HCK4	AD	0.00483447	0.000939828		0.00107271	0.000275072
ENSG00000106714_af	Q9BZ76	AD	0.00495893	0.000951289		0.00864809	0.00187966
ENSG00000109686_af	Q5HYK7	AD	0.00518496	0.000962751		0.0233144	0.00528367
ENSG00000204941_af	Q15238	AD	0.00527277	0.000974212		0.204095	0.0434155
ENSG00000244694_af	Q6ZW05	AD	0.00530909	0.000985673		0.00209221	0.000458453
ENSG00000086730_af	Q9GZY6	AD	0.00535826	0.000997135		0.00517185	0.00122636
ENSG00000130720_af	Q8N539	AD	0.00537356	0.0010086		0.079387	0.0169742
ENSG00000116205_af	Q96MN5	AD	0.00539052	0.00102006		0.0288666	0.00646418
ENSG00000095370_af	Q8N5H7	AD	0.00543364	0.00103152		0.144519	0.0308883
ENSG00000258873_af	A6NLW8	AD	0.0054676	0.00104298		0.00259393	0.000630372
ENSG00000066084_af	Q9P265	AD	0.00560509	0.00105444		0.163396	0.0348309
ENSG00000143552_af	Q5VU65	AD	0.00564813	0.0010659		0.00358956	0.000825215
ENSG00000178127_af	P19404	AD	0.00570364	0.00107736		0.0620703	0.0134556
ENSG00000128594_af	Q9HBW1	AD	0.00577598	0.00108883		0.284987	0.0601375
ENSG00000160111_af	Q8IZJ3	AD	0.00583938	0.00110029		0.455476	0.0949456
ENSG00000266053_af	P19404	AD	0.00591269	0.00111175		0.0760547	0.0163668
ENSG00000072422_af	O94844	AD	0.00597007	0.00112321		0.0103971	0.0022235
ENSG00000181826_af	Q8IUW5	AD	0.00606765	0.00113467		0.00365065	0.000859599
ENSG00000088854_af	Q5TEA3	AD	0.00612532	0.00114613		0.00258855	0.000618911
ENSG00000114446_af	Q9NWB7	AD	0.006141	0.00115759		0.0211306	0.00477937
ENSG00000255241_af	P57729	AD	0.00617145	0.00116905		0.0100064	0.00213181
ENSG00000182307_af	Q9H7E9	AD	0.0063039	0.00118052		0.0210652	0.00474499
ENSG00000125449_af	Q9H6L4	AD	0.00642698	0.00119198		0.00387883	0.000905444
ENSG00000149507_af	Q86WS3	AD	0.00647529	0.00120344		0.0132434	0.00292264
ENSG00000125510_af	P41146	AD	0.00650914	0.0012149		2.19577e-05	1.14613e-05
ENSG00000228300_af	Q9BVV8	AD	0.00663127	0.00122636		0.00638011	0.00145559
ENSG00000119965_af	Q9H8K7	AD	0.00667955	0.00123782		0.047343	0.010361
ENSG00000137098_af	Q99932	AD	0.00671982	0.00124928		0.0747058	0.0161261
ENSG00000075407_af	P17032	AD	0.00674085	0.00126074		0.152361	0.0324928
ENSG00000176927_af	A4FU69	AD	0.00677741	0.00127221		0.0147463	0.00327794
ENSG00000165806_af	P55210	AD	0.00683127	0.00128367		0.00411753	0.000962751
ENSG00000139714_af	Q6PF18	AD	0.00688988	0.00129513		0.0686444	0.0148309
ENSG00000198369_af	Q7Z698	AD	0.00692621	0.00130659		0.00732515	0.00160458
ENSG00000154237_af	Q38SD2	AD	0.00696754	0.00131805		0.0424969	0.00928367
ENSG00000189280_af	O95377	AD	0.00703613	0.00132951		0.0302225	0.00665903
ENSG00000101333_af	Q15147	AD	0.00712349	0.00134097		0.1598	0.0343037
ENSG00000128714_af	P35453	AD	0.00716656	0.00135244		0.00994645	0.00212034
ENSG00000126337_af	O76013	AD	0.00727655	0.0013639		0.0361982	0.00806877
ENSG00000142765_af	Q8IYJ3	AD	0.00730244	0.00137536		0.0261366	0.00590258
ENSG00000148399_af	Q9BTV6	AD	0.00730661	0.00138682		0.0075027	0.00165043
ENSG00000173786_af	P09543	AD	0.00743656	0.00139828		0.000197623	6.87679e-05
ENSG00000054793_af	O75110	AD	0.00749582	0.00140974		0.0132118	0.00289971
ENSG00000257342_af	Q13438	AD	0.00750716	0.0014212		0.112637	0.0236332
ENSG00000135506_af	Q13438	AD	0.00750716	0.00143266		0.112637	0.0236218
ENSG00000155561_af	Q92621	AD	0.00750918	0.00144413		0.0231233	0.00524928
ENSG00000126785_af	Q9H4E5	AD	0.00753899	0.00145559		0.0495973	0.0109914
ENSG00000105607_af	Q92947	AD	0.00754543	0.00146705		0.000235464	8.02292e-05
ENSG00000123892_af	P57729	AD	0.00759633	0.00147851		0.0113823	0.00244126
ENSG00000259755_af	Q38SD2	AD	0.00777706	0.00148997		0.0504021	0.0111862
ENSG00000132321_af	Q86XH1	AD	0.00815367	0.00150143		0.00850333	0.00184527
ENSG00000149609_af	Q9BQM9	AD	0.00817059	0.00151289		0.0755218	0.0162292
ENSG00000177076_af	Q5QJU3	AD	0.0082762	0.00152436		0.127948	0.0271519
ENSG00000109445_af	Q9Y3S2	AD	0.00830319	0.00153582		0.127232	0.0269914
ENSG00000166126_af	Q9BXJ7	AD	0.00835113	0.00154728		0.0238371	0.0054212
ENSG00000130560_af	Q9BSL1	AD	0.00843871	0.00155874		0.126181	0.0266934
ENSG00000125846_af	P52736	AD	0.00844292	0.0015702		0.0635707	0.0137192
ENSG00000150455_af	P58753	AD	0.00852161	0.00158166		0.00186025	0.000389685
ENSG00000156030_af	Q6PJG2	AD	0.00859813	0.00159312		0.0277744	0.0062235
ENSG00000182566_af	Q6UXB4	AD	0.00863422	0.00160458		0.0530681	0.0117364
ENSG00000204963_af	Q9UN75	AD	0.00863576	0.00161605		0.0318101	0.00707163
ENSG00000250120_af	Q9UN75	AD	0.00863576	0.00162751		0.0318095	0.00704871
ENSG00000204962_af	Q9UN75	AD	0.00863576	0.00163897		0.0318088	0.00703725
ENSG00000251664_af	Q9UN75	AD	0.00863576	0.00165043		0.0318101	0.00708309
ENSG00000204961_af	Q9UN75	AD	0.00863576	0.00166189		0.0318087	0.00702579
ENSG00000249158_af	Q9UN75	AD	0.00863576	0.00167335		0.0318095	0.00706017
ENSG00000181616_af	Q8NGJ2	AD	0.00864472	0.00168481		0.170751	0.0362521
ENSG00000205364_af	Q8N339	AD	0.00876819	0.00169628		0.00044207	0.000126074
ENSG00000168676_af	Q17RG1	AD	0.00882115	0.00170774		0.0240168	0.00544413
ENSG00000085982_af	Q9NVE5	AD	0.00895531	0.0017192		0.0195719	0.00426361
ENSG00000171298_af	P10253	AD	0.00905384	0.00173066		0.132948	0.0282178
ENSG00000143536_af	Q9UBG3	AD	0.00906028	0.00174212		0.230594	0.0487335
ENSG00000227415_af	Q9UBG3	AD	0.00906028	0.00175358		0.230595	0.048745
ENSG00000182700_af	A6NJ69	AD	0.00913984	0.00176504		0.00335765	0.000756447
ENSG00000128694_af	Q9H4B0	AD	0.00914311	0.0017765		0.0158509	0.0034384
ENSG00000126838_af	P20742	AD	0.00914665	0.00178797		0.00576861	0.00130659
ENSG00000126461_af	Q9H7N4	AD	0.00925315	0.00179943		0.105529	0.0223266
ENSG00000149089_af	Q96GX9	AD	0.00925382	0.00181089		0.0250702	0.00561605
ENSG00000070413_af	P98153	AD	0.00926721	0.00182235		0.0573801	0.0125616
ENSG00000183034_af	Q7RTS6	AD	0.00930498	0.00183381		0.145573	0.0310716
ENSG00000198390_af	Q8IUC0	AD	0.00931172	0.00184527		0.0477336	0.0104413
ENSG00000266997_af	P42765	AD	0.00933214	0.00185673		0.203727	0.043255
ENSG00000180340_af	Q14332	AD	0.00937821	0.00186819		0.0795894	0.0170544
ENSG00000259583_af	P47895	AD	0.00940699	0.00187966		0.0365411	0.00812607
ENSG00000145414_af	Q96HR8	AD	0.00955139	0.00189112		0.0149378	0.00332378
ENSG00000110887_af	P14920	AD	0.00956789	0.00190258		0.0396339	0.0086533
ENSG00000180104_af	O60645	AD	0.00957336	0.00191404		0.0436686	0.00955874
ENSG00000170091_af	Q9Y328	AD	0.00960229	0.0019255		0.0471725	0.0103037
ENSG00000151773_af	Q5T0U0	AD	0.00973352	0.00193696		0.87708	0.177605
ENSG00000166387_af	Q8ND30	AD	0.00987093	0.00194842		0.0356952	0.00789685
ENSG00000132677_af	Q9H310	AD	0.00990705	0.00195989		0.0896968	0.0191289
ENSG00000185149_af	P49146	AD	0.00990917	0.00197135		0.0697089	0.015106
ENSG00000143382_af	Q6UY14	AD	0.00999725	0.00198281		0.0142758	0.00316332
ENSG00000129351_af	Q12906	AD	0.00999853	0.00199427		0.0209193	0.00468768
ENSG00000229153_af	P59551	AD	0.0101581	0.00200573		0.0185128	0.004
ENSG00000185899_af	P59551	AD	0.0101581	0.00201719		0.0185128	0.00398854
ENSG00000154822_af	Q9UPR0	AD	0.0101797	0.00202865		0.135235	0.0287335
ENSG00000151552_af	P09417	AD	0.0102304	0.00204011		0.0200481	0.00441261
ENSG00000177468_af	Q7RTU3	AD	0.0102717	0.00205158		0.00420671	0.000997135
ENSG00000105641_af	Q92911	AD	0.0103413	0.00206304		0.417639	0.0870602
ENSG00000077327_af	O75602	AD	0.0108164	0.0020745		0.000100588	4.58453e-05
ENSG00000133773_af	Q9P031	AD	0.0108594	0.00208596		0.0716736	0.0154842
ENSG00000187837_af	P16403	AD	0.0108646	0.00209742		0.21137	0.0450544
ENSG00000178974_af	Q9NWN3	AD	0.0108855	0.00210888		0.0480445	0.010533
ENSG00000204278_af	A6NFC5	AD	0.0109066	0.00212034		0.0338914	0.00759885
ENSG00000135917_af	Q9BZV2	AD	0.0109387	0.00213181		0.0448151	0.00978797
ENSG00000135040_af	Q5VZE5	AD	0.01094	0.00214327		0.0784707	0.0168138
ENSG00000183844_af	P58499	AD	0.0110111	0.00215473		0.0124178	0.00273926
ENSG00000159459_af	Q8IWV7	AD	0.0110245	0.00216619		0.0109922	0.00237249
ENSG00000166025_af	Q8IY63	AD	0.011055	0.00217765		0.15392	0.0328711
ENSG00000179431_af	Q86VR8	AD	0.0111565	0.00218911		0.153579	0.0328023
ENSG00000085552_af	Q9P2J2	AD	0.0111597	0.00220057		0.726786	0.148676
ENSG00000146383_af	Q96RI8	AD	0.0111738	0.00221203		0.157324	0.0337307
ENSG00000116138_af	Q9Y2G8	AD	0.011239	0.0022235		0.00460481	0.00108883
ENSG00000105717_af	Q9BYU1	AD	0.0112543	0.00223496		0.00826577	0.0017765
ENSG00000169902_af	O60507	AD	0.0113128	0.00224642		0.0916315	0.0193926
ENSG00000116785_af	Q02985	AD	0.0113266	0.00225788		0.0455067	0.00991404
ENSG00000198825_af	Q9Y2H2	AD	0.0113734	0.00226934		0.110152	0.0231519
ENSG00000148296_af	O75683	AD	0.0114692	0.0022808		0.134103	0.0284928
ENSG00000119681_af	Q14767	AD	0.0115021	0.00229226		0.0063009	0.00143266
ENSG00000106066_af	Q9H3G5	AD	0.0115549	0.00230372		0.306485	0.0645043
ENSG00000105810_af	Q00534	AD	0.0115903	0.00231519		0.0273364	0.00615473
ENSG00000163220_af	P06702	AD	0.0116005	0.00232665		0.0987781	0.0207908
ENSG00000166801_af	Q96PZ2	AD	0.011663	0.00233811		0.0185812	0.00405731
ENSG00000132000_af	Q6PEZ8	AD	0.011871	0.00234957		0.389305	0.0810315
ENSG00000130561_af	P10523	AD	0.0118803	0.00236103		0.0972743	0.0204126
ENSG00000164010_af	Q96PL5	AD	0.0119225	0.00237249		0.0306817	0.00679656
ENSG00000011451_af	O95785	AD	0.0121775	0.00238395		0.00129428	0.000320917
ENSG00000161013_af	Q9UQ53	AD	0.0122264	0.00239542		0.114619	0.0241146
ENSG00000158901_af	Q8IUA0	AD	0.0122997	0.00240688		0.175436	0.037341
ENSG00000172020_af	P17677	AD	0.0123571	0.00241834		0.114577	0.0240802
ENSG00000177558_af	Q17R55	AD	0.012362	0.0024298		0.0287007	0.00644126
ENSG00000177112_af	Q9Y5Y7	AD	0.0124136	0.00244126		0.0278732	0.00625788
ENSG00000133800_af	Q9Y5Y7	AD	0.0124136	0.00245272		0.0278731	0.00624642
ENSG00000078902_af	Q9H0E2	AD	0.0125599	0.00246418		0.372207	0.0777192
ENSG00000108829_af	Q96AY2	AD	0.0126973	0.00247564		0.014317	0.00319771
ENSG00000154920_af	Q96AY2	AD	0.0126973	0.00248711		0.0143167	0.00318625
ENSG00000183559_af	Q5SQS8	AD	0.0127558	0.00249857		0.152655	0.0325501
ENSG00000136536_af	Q9H992	AD	0.0127852	0.00251003		0.0049635	0.00114613
ENSG00000189298_af	Q9BRR0	AD	0.0128331	0.00252149		0.566146	0.116963
ENSG00000259720_af	Q7Z4N2	AD	0.0129571	0.00253295		0.0122392	0.00267049
ENSG00000237651_af	A8MZ97	AD	0.0129999	0.00254441		0.255488	0.0540745
ENSG00000197785_af	Q9NVI7	AD	0.0130474	0.00255587		0.00972066	0.00204011
ENSG00000261707_af	P0C024	AD	0.013056	0.00256734		0.0540776	0.0119427
ENSG00000137834_af	O43541	AD	0.0130583	0.0025788		0.0634678	0.0136963
ENSG00000109832_af	Q9UHL0	AD	0.0130653	0.00259026		0.00986536	0.00209742
ENSG00000255027_af	Q9UHL0	AD	0.0130653	0.00260172		0.00986536	0.00208596
ENSG00000186260_af	Q9ULH7	AD	0.0130908	0.00261318		0.111039	0.0233467
ENSG00000188227_af	Q6ZN11	AD	0.0131212	0.00262464		0.087604	0.0186705
ENSG00000204371_af	Q96KQ7	AD	0.0132997	0.0026361		0.0107167	0.0022808
ENSG00000197576_af	Q00056	AD	0.013333	0.00264756		0.00834136	0.00179943
ENSG00000081052_af	P53420	AD	0.0136505	0.00265903		0.103861	0.0218453
ENSG00000004846_af	Q2M3G0	AD	0.0137196	0.00267049		0.0765878	0.0164699
ENSG00000143061_af	O75054	AD	0.0137425	0.00268195		0.000647717	0.000160458
ENSG00000206530_af	Q96MT7	AD	0.0137983	0.00269341		0.153059	0.0326648
ENSG00000174672_af	Q8IWQ3	AD	0.0138479	0.00270487		0.0598473	0.0130086
ENSG00000118515_af	O00141	AD	0.0138744	0.00271633		0.112856	0.0236562
ENSG00000088756_af	Q9P2N2	AD	0.013923	0.00272779		0.00317716	0.00069914
ENSG00000253710_af	Q2TAA5	AD	0.0139427	0.00273926		0.0890346	0.0190258
ENSG00000125813_af	P15863	AD	0.0139647	0.00275072		0.0206189	0.0045616
ENSG00000204642_af	P30511	AD	0.0140351	0.00276218		0.0185913	0.00406877
ENSG00000100304_af	Q14166	AD	0.0140688	0.00277364		0.0598557	0.0130201
ENSG00000115183_af	Q9C0D5	AD	0.0140944	0.0027851		0.0284088	0.00639542
ENSG00000169291_af	Q5VZ18	AD	0.0141307	0.00279656		0.100158	0.0210888
ENSG00000170471_af	Q86X10	AD	0.0141391	0.00280802		0.189278	0.0400917
ENSG00000119714_af	Q15743	AD	0.014229	0.00281948		0.0811434	0.0173066
ENSG00000188820_af	Q5R3K3	AD	0.0142914	0.00283095		0.349039	0.0732034
ENSG00000244158_af	Q5R3K3	AD	0.0142914	0.00284241		0.349039	0.0732149
ENSG00000164304_af	Q8TC20	AD	0.0143873	0.00285387		0.0566178	0.0123668
ENSG00000124766_af	Q06945	AD	0.0144702	0.00286533		0.000590486	0.000148997
ENSG00000172493_af	P51825	AD	0.014593	0.00287679		0.00868934	0.00189112
ENSG00000106346_af	Q9H9J4	AD	0.014606	0.00288825		0.0408921	0.00888252
ENSG00000125850_af	Q9BQP7	AD	0.0147359	0.00289971		0.0106562	0.00226934
ENSG00000125871_af	Q9BQP7	AD	0.0147359	0.00291117		0.0106561	0.00225788
ENSG00000119787_af	Q8NHH9	AD	0.0147775	0.00292264		0.278008	0.058659
ENSG00000219607_af	B7ZBB8	AD	0.0148146	0.0029341		0.164715	0.0351404
ENSG00000185052_af	Q9HC58	AD	0.0148819	0.00294556		0.0185942	0.00408023
ENSG00000141452_af	Q96DM3	AD	0.0150418	0.00295702		0.11296	0.0236905
ENSG00000171466_af	Q6V9R5	AD	0.0150836	0.00296848		0.0122436	0.00268195
ENSG00000263644_af	Q9HCD6	AD	0.0151009	0.00297994		0.00258246	0.000595989
ENSG00000165066_af	A6NJ46	AD	0.01519	0.0029914		0.0284322	0.00640688
ENSG00000236279_af	P0C7M8	AD	0.015242	0.00300287		0.0509153	0.0113352
ENSG00000188056_af	Q6UXN2	AD	0.0152624	0.00301433		0.0319279	0.00712894
ENSG00000257923_af	P39880	AD	0.015266	0.00302579		0.308705	0.0649857
ENSG00000171135_af	Q8N5M9	AD	0.0152871	0.00303725		0.0387271	0.00853868
ENSG00000132359_af	Q684P5	AD	0.0153088	0.00304871		0.0107867	0.00231519
ENSG00000187848_af	Q9UBL9	AD	0.0153287	0.00306017		0.0224586	0.00510029
ENSG00000100433_af	P57789	AD	0.0153754	0.00307163		0.128591	0.0272436
ENSG00000204463_af	P46379	AD	0.0154445	0.00308309		0.0865381	0.0184527
ENSG00000173557_af	A6NJV1	AD	0.0154776	0.00309456		0.0237041	0.00537536
ENSG00000145491_af	Q96C74	AD	0.0155019	0.00310602		0.0213909	0.00487106
ENSG00000100416_af	O75648	AD	0.0155115	0.00311748		0.0497239	0.0110143
ENSG00000152454_af	Q9Y2P7	AD	0.0156068	0.00312894		0.00740733	0.00163897
ENSG00000155011_af	Q9UBU2	AD	0.0157461	0.0031404		0.0319487	0.00715186
ENSG00000172362_af	Q96R08	AD	0.0157788	0.00315186		0.196322	0.0416848
ENSG00000163719_af	Q8NCE2	AD	0.0158033	0.00316332		0.0175852	0.00378223
ENSG00000065717_af	Q04725	AD	0.0158317	0.00317479		0.0487772	0.0107507
ENSG00000170390_af	Q8N568	AD	0.0158533	0.00318625		0.12829	0.0271977
ENSG00000179447_af	Q9HC58	AD	0.0159785	0.00319771		0.0159374	0.00348424
ENSG00000117519_af	Q15417	AD	0.0160639	0.00320917		0.0144891	0.00323209
ENSG00000160539_af	Q8NBV4	AD	0.0160692	0.00322063		0.0895035	0.0190831
ENSG00000198542_af	O95965	AD	0.0160845	0.00323209		0.0325072	0.00727794
ENSG00000197275_af	Q9Y620	AD	0.016192	0.00324355		0.00515184	0.0012149
ENSG00000187048_af	Q02928	AD	0.0162271	0.00325501		0.0955653	0.0200802
ENSG00000117650_af	P51955	AD	0.016311	0.00326648		0.110698	0.0232779
ENSG00000007080_af	Q96CT7	AD	0.0163541	0.00327794		0.114431	0.0240458
ENSG00000139610_af	Q9UNI1	AD	0.016362	0.0032894		0.0123974	0.00271633
ENSG00000181171_af	Q2WGJ9	AD	0.0164217	0.00330086		0.157733	0.0339255
ENSG00000103381_af	Q9BRF8	AD	0.0164416	0.00331232		0.0036195	0.000836676
ENSG00000047662_af	Q9ULE4	AD	0.0164793	0.00332378		0.047871	0.0104642
ENSG00000175305_af	O96020	AD	0.0165632	0.00333524		0.00123064	0.000309456
ENSG00000134160_af	Q7Z4N2	AD	0.0165951	0.0033467		0.0158011	0.00342693
ENSG00000065371_af	Q9HAT0	AD	0.0166874	0.00335817		0.00503089	0.00119198
ENSG00000204300_af	Q6GV28	AD	0.0168306	0.00336963		0.00496695	0.00115759
ENSG00000177465_af	Q8N9L9	AD	0.017087	0.00338109		0.0207273	0.00459599
ENSG00000117411_af	O60909	AD	0.0171686	0.00339255		0.000764059	0.000194842
ENSG00000029559_af	P21815	AD	0.0172364	0.00340401		0.0815884	0.0173983
ENSG00000149809_af	O76062	AD	0.0173279	0.00341547		0.0678434	0.0146476
ENSG00000138821_af	Q9C0K1	AD	0.0174307	0.00342693		0.0994355	0.0209054
ENSG00000136448_af	P30419	AD	0.0175412	0.0034384		0.00431611	0.00102006
ENSG00000160199_af	P55347	AD	0.0175563	0.00344986		0.149023	0.0317364
ENSG00000122783_af	Q9NV12	AD	0.0175994	0.00346132		0.152874	0.0326189
ENSG00000146859_af	Q9NV12	AD	0.0175994	0.00347278		0.15287	0.0326074
ENSG00000111981_af	Q9BZM6	AD	0.0176224	0.00348424		0.193696	0.0410888
ENSG00000255518_af	P51451	AD	0.0176692	0.0034957		0.0411059	0.00893983
ENSG00000169129_af	Q8N4X5	AD	0.0178595	0.00350716		0.0905096	0.0192092
ENSG00000168958_af	Q9GZY8	AD	0.0179523	0.00351862		0.143708	0.0306934
ENSG00000138395_af	Q96Q40	AD	0.0180336	0.00353009		0.175352	0.0373181
ENSG00000073803_af	O43283	AD	0.0180666	0.00354155		0.0694511	0.0150487
ENSG00000008323_af	Q3KR16	AD	0.0180777	0.00355301		0.0722438	0.0155874
ENSG00000179988_af	Q8IV42	AD	0.0180791	0.00356447		0.0411629	0.00897421
ENSG00000179468_af	Q8NGT5	AD	0.0181111	0.00357593		0.0450374	0.00983381
ENSG00000136425_af	O75838	AD	0.0183145	0.00358739		0.00824151	0.00175358
ENSG00000148688_af	P78346	AD	0.0185192	0.00359885		0.162239	0.0346476
ENSG00000119596_af	P49750	AD	0.0186604	0.00361032		0.0188641	0.00410315
ENSG00000179091_af	P08574	AD	0.018744	0.00362178		0.0118396	0.00262464
ENSG00000167104_af	Q8NFQ5	AD	0.0187961	0.00363324		0.0603207	0.0130888
ENSG00000144362_af	Q8TCD6	AD	0.0188143	0.0036447		0.0482221	0.0105788
ENSG00000149380_af	Q7Z4N8	AD	0.0188524	0.00365616		0.0493632	0.0109341
ENSG00000142002_af	Q86TI2	AD	0.0190136	0.00366762		0.0906161	0.0192436
ENSG00000238221_af	P43307	AD	0.019014	0.00367908		0.534413	0.110625
ENSG00000066813_af	Q68CK6	AD	0.0190647	0.00369054		0.0224187	0.00508883
ENSG00000257127_af	Q5K131	AD	0.019229	0.00370201		0.188892	0.0400344
ENSG00000266923_af	Q5K131	AD	0.019229	0.00371347		0.188895	0.0400458
ENSG00000205057_af	Q5K131	AD	0.019229	0.00372493		0.188895	0.0400573
ENSG00000213339_af	Q9BXR0	AD	0.019273	0.00373639		0.00897546	0.00194842
ENSG00000136099_af	O95206	AD	0.0192928	0.00374785		0.00354117	0.000813754
ENSG00000006611_af	Q9Y6N9	AD	0.0193626	0.00375931		0.178239	0.0380287
ENSG00000127951_af	Q14314	AD	0.0194159	0.00377077		0.105185	0.0221433
ENSG00000106333_af	Q15113	AD	0.0194461	0.00378223		0.0533058	0.0117937
ENSG00000197165_af	P50226	AD	0.0194532	0.0037937		0.103318	0.0217192
ENSG00000133193_af	Q9BSJ5	AD	0.019482	0.00380516		0.0283993	0.00638395
ENSG00000251165_af	P03951	AD	0.0195461	0.00381662		0.0421225	0.00919198
ENSG00000128052_af	P35968	AD	0.0197376	0.00382808		0.0198751	0.00434384
ENSG00000102962_af	O00626	AD	0.0198705	0.00383954		0.00572255	0.00129513
ENSG00000182318_af	P10073	AD	0.0199808	0.003851		0.20821	0.0442292
ENSG00000145675_af	P27986	AD	0.020048	0.00386246		0.0834298	0.0177994
ENSG00000102996_af	P51511	AD	0.0200634	0.00387393		0.0198748	0.00433238
ENSG00000186166_af	Q86UT8	AD	0.0203149	0.00388539		0.00830572	0.00178797
ENSG00000213981_af	Q8WXR4	AD	0.0203735	0.00389685		0.134713	0.028596
ENSG00000175662_af	Q6ZVM7	AD	0.0203966	0.00390831		0.0332409	0.00741547
ENSG00000124812_af	P54107	AD	0.0204208	0.00391977		0.047489	0.0103725
ENSG00000141446_af	Q5FWF5	AD	0.0205546	0.00393123		0.111441	0.023404
ENSG00000170632_af	Q8N2F6	AD	0.0205923	0.00394269		0.10958	0.0230143
ENSG00000024422_af	Q9NZN4	AD	0.0206315	0.00395415		0.207493	0.0440458
ENSG00000155974_af	Q9Y3R0	AD	0.0206718	0.00396562		0.0304716	0.00668195
ENSG00000171497_af	Q08752	AD	0.0207347	0.00397708		0.016077	0.00350716
ENSG00000004809_af	Q86VW1	AD	0.0207529	0.00398854		0.0920387	0.0194728
ENSG00000230301_af	Q8NGV6	AD	0.0207897	0.004		0.257492	0.0543954
ENSG00000145734_af	A6H8Y1	AD	0.020827	0.00401146		0.00471543	0.00110029
ENSG00000186998_af	Q96A84	AD	0.0208527	0.00402292		0.0755322	0.0162407
ENSG00000244513_af	P82094	AD	0.0208556	0.00403438		0.251246	0.0529857
ENSG00000144747_af	P82094	AD	0.0208556	0.00404585		0.251243	0.0529742
ENSG00000159231_af	O75828	AD	0.0209115	0.00405731		0.234325	0.0494212
ENSG00000187801_af	Q9UJL9	AD	0.0209439	0.00406877		0.122889	0.0260057
ENSG00000215695_af	Q92681	AD	0.0210032	0.00408023		0.186373	0.0395415
ENSG00000197312_af	Q92681	AD	0.0210032	0.00409169		0.186373	0.039553
ENSG00000166173_af	Q9BRS8	AD	0.0210084	0.00410315		0.241414	0.0507163
ENSG00000183628_af	Q14129	AD	0.0211836	0.00411461		0.288034	0.0607794
ENSG00000169679_af	O43683	AD	0.0212397	0.00412607		0.0380205	0.00848138
ENSG00000182372_af	Q9UBY8	AD	0.0214146	0.00413754		0.00497484	0.00118052
ENSG00000178764_af	Q9Y6X8	AD	0.0214884	0.004149		0.100145	0.0210774
ENSG00000168778_af	Q96GX1	AD	0.0216384	0.00416046		0.363038	0.0760229
ENSG00000068976_af	P11217	AD	0.0217438	0.00417192		0.289344	0.0610201
ENSG00000175143_af	O43869	AD	0.0217732	0.00418338		0.346952	0.072745
ENSG00000173805_af	P54257	AD	0.0218051	0.00419484		0.135453	0.0287908
ENSG00000138134_af	Q96FJ0	AD	0.0219223	0.0042063		0.120448	0.0255244
ENSG00000134490_af	Q24JQ0	AD	0.021942	0.00421777		0.105193	0.0221547
ENSG00000196832_af	Q8NGC1	AD	0.0219691	0.00422923		0.429171	0.0895358
ENSG00000137078_af	Q9Y3P8	AD	0.0220254	0.00424069		0.0108031	0.00232665
ENSG00000095380_af	Q9NR45	AD	0.0220357	0.00425215		0.466638	0.0971003
ENSG00000138311_af	Q70YC5	AD	0.0222548	0.00426361		0.42711	0.0891461
ENSG00000197579_af	Q9NS56	AD	0.0223176	0.00427507		0.0153899	0.00339255
ENSG00000071205_af	A1A4S6	AD	0.0223611	0.00428653		0.284337	0.0600115
ENSG00000141506_af	Q8WYR1	AD	0.022405	0.00429799		0.0215826	0.00492837
ENSG00000132300_af	Q96EY7	AD	0.0224413	0.00430946		0.0718194	0.0155072
ENSG00000261609_af	Q9H2C0	AD	0.0225344	0.00432092		0.143857	0.0307278
ENSG00000112893_af	Q16706	AD	0.0225432	0.00433238		0.0223522	0.00507736
ENSG00000105737_af	Q16478	AD	0.0225459	0.00434384		0.0426341	0.0093639
ENSG00000172890_af	Q6IA69	AD	0.0226358	0.0043553		0.0083503	0.00181089
ENSG00000240542_af	A8MXZ3	AD	0.0226731	0.00436676		0.031949	0.00716332
ENSG00000144730_af	Q8NFM7	AD	0.0227265	0.00437822		0.421675	0.0878968
ENSG00000138785_af	Q8NEC7	AD	0.0227922	0.00438968		0.629623	0.129112
ENSG00000138780_af	Q8NEC7	AD	0.0227922	0.00440115		0.629629	0.129146
ENSG00000183250_af	P58512	AD	0.0228264	0.00441261		0.00849697	0.00183381
ENSG00000204525_af	P10321	AD	0.0228796	0.00442407		0.356424	0.0747736
ENSG00000107362_af	Q5VST6	AD	0.0229432	0.00443553		0.057059	0.0124585
ENSG00000153707_af	P23468	AD	0.0230296	0.00444699		0.121536	0.0257307
ENSG00000100441_af	O15037	AD	0.023115	0.00445845		0.00408573	0.000939828
ENSG00000067141_af	Q92859	AD	0.0232322	0.00446991		0.0613967	0.0132951
ENSG00000179526_af	Q9H0F6	AD	0.0232651	0.00448138		0.157436	0.0337765
ENSG00000124275_af	Q9UBK8	AD	0.0233336	0.00449284		0.0536509	0.0118625
ENSG00000136854_af	P61764	AD	0.0233409	0.0045043		0.0970829	0.0203668
ENSG00000197467_af	Q5TAT6	AD	0.0234025	0.00451576		0.00187388	0.000401146
ENSG00000132825_af	O95685	AD	0.0234293	0.00452722		0.0129274	0.00279656
ENSG00000178773_af	Q9UBL6	AD	0.0234567	0.00453868		0.0656455	0.0141089
ENSG00000128313_af	Q9BWW9	AD	0.0235436	0.00455014		0.016466	0.00361032
ENSG00000188732_af	A4D161	AD	0.0237271	0.0045616		0.0826001	0.0176504
ENSG00000198785_af	Q8TCU5	AD	0.0240068	0.00457307		0.0808425	0.0172493
ENSG00000173653_af	Q9Y256	AD	0.0240862	0.00458453		0.0365885	0.008149
ENSG00000257359_af	Q9Y4C8	AD	0.0241386	0.00459599		0.00735975	0.00162751
ENSG00000038358_af	Q6P2E9	AD	0.0242069	0.00460745		0.203025	0.0430946
ENSG00000133105_af	Q8WXD0	AD	0.0242172	0.00461891		0.011568	0.00248711
ENSG00000244509_af	Q9NRW3	AD	0.0243038	0.00463037		0.0212809	0.00484814
ENSG00000187145_af	P82921	AD	0.0243087	0.00464183		0.0124422	0.00275072
ENSG00000181418_af	O94850	AD	0.0244264	0.0046533		0.0374201	0.00834384
ENSG00000130038_af	Q9BSW2	AD	0.0244909	0.00466476		0.120457	0.0255358
ENSG00000120802_af	P42166	AD	0.0245222	0.00467622		0.513514	0.106476
ENSG00000176399_af	Q5VZB9	AD	0.0245632	0.00468768		0.0439113	0.00965043
ENSG00000155755_af	Q96Q45	AD	0.0245833	0.00469914		0.011124	0.00240688
ENSG00000155886_af	Q9UI40	AD	0.0247478	0.0047106		0.082493	0.0175931
ENSG00000132561_af	O00339	AD	0.0247972	0.00472206		0.0487214	0.0106934
ENSG00000171291_af	Q8NDP4	AD	0.0248261	0.00473352		0.0480559	0.0105444
ENSG00000059804_af	P11169	AD	0.02484	0.00474499		0.0175275	0.00377077
ENSG00000088727_af	Q9HAQ2	AD	0.0248406	0.00475645		0.100095	0.0210544
ENSG00000139505_af	Q9Y217	AD	0.0248669	0.00476791		0.0658274	0.0141662
ENSG00000156508_af	P68104	AD	0.0248713	0.00477937		0.00313973	0.000687679
ENSG00000168237_af	Q8IVS8	AD	0.0248916	0.00479083		0.0404269	0.00879083
ENSG00000153406_af	Q9HBL8	AD	0.0250805	0.00480229		0.132104	0.0280115
ENSG00000168418_af	Q8TDN1	AD	0.025143	0.00481375		0.0270847	0.00610888
ENSG00000100314_af	Q86V35	AD	0.0251736	0.00482521		0.0196032	0.00427507
ENSG00000015532_af	Q9H1B5	AD	0.0252007	0.00483668		0.0146962	0.00326648
ENSG00000026508_af	P16070	AD	0.0252935	0.00484814		0.0397479	0.0087106
ENSG00000146192_af	Q7Z6J4	AD	0.0253423	0.0048596		0.289919	0.0611347
ENSG00000198719_af	O00548	AD	0.0253462	0.00487106		0.13899	0.029788
ENSG00000180644_af	P14222	AD	0.0253838	0.00488252		0.319281	0.0669914
ENSG00000112116_af	Q96PD4	AD	0.0254015	0.00489398		0.0459487	0.010063
ENSG00000171798_af	Q76NI1	AD	0.0254332	0.00490544		0.16422	0.0349914
ENSG00000154485_af	Q8N119	AD	0.0254653	0.00491691		0.0130134	0.00283095
ENSG00000151952_af	Q14C87	AD	0.0254941	0.00492837		0.0865095	0.0184413
ENSG00000108799_af	Q92800	AD	0.0255502	0.00493983		0.182668	0.0388424
ENSG00000083444_af	Q02809	AD	0.0256036	0.00495129		0.0858698	0.0183496
ENSG00000082293_af	Q14993	AD	0.0257015	0.00496275		0.0413368	0.00905444
ENSG00000051009_af	Q8N612	AD	0.0257239	0.00497421		0.0129332	0.00280802
ENSG00000050426_af	Q6P1Q0	AD	0.0257853	0.00498567		0.0523654	0.0116103
ENSG00000107147_af	Q5JUK3	AD	0.0258456	0.00499713		0.00431563	0.0010086
ENSG00000028528_af	Q13596	AD	0.0259968	0.0050086		0.630122	0.129295
ENSG00000145868_af	Q6PIJ6	AD	0.0262725	0.00502006		0.218434	0.0462808
ENSG00000249348_af	Q96QK8	AD	0.0263119	0.00503152		0.0231291	0.00526074
ENSG00000133706_af	Q9P2J5	AD	0.0263438	0.00504298		0.133214	0.0282865
ENSG00000175820_af	Q8NDH2	AD	0.0264346	0.00505444		0.138706	0.0296734
ENSG00000168944_af	Q8N960	AD	0.0264402	0.0050659		0.0779288	0.0166877
ENSG00000163468_af	P49368	AD	0.0264806	0.00507736		0.00193492	0.000424069
ENSG00000204644_af	Q9NU63	AD	0.0265025	0.00508883		0.0576713	0.0126304
ENSG00000131386_af	Q8N3T1	AD	0.0265432	0.00510029		0.0179979	0.00386246
ENSG00000188807_af	Q5SNT2	AD	0.0265499	0.00511175		0.0975325	0.0204585
ENSG00000078328_af	Q9NWB1	AD	0.02656	0.00512321		0.199161	0.042361
ENSG00000233224_af	P0C0S8	AD	0.026569	0.00513467		0.0569181	0.0124126
ENSG00000205108_af	Q6ZU69	AD	0.0265752	0.00514613		0.0175016	0.00375931
ENSG00000102547_af	Q9H9S4	AD	0.0266148	0.00515759		0.0327239	0.00733524
ENSG00000214960_af	A4D126	AD	0.026628	0.00516905		0.00389817	0.000916905
ENSG00000165269_af	O14520	AD	0.0266331	0.00518052		0.435476	0.0906017
ENSG00000115318_af	P58215	AD	0.0267269	0.00519198		0.00342167	0.000767908
ENSG00000196966_af	P68431	AD	0.0267551	0.00520344		0.125655	0.0265903
ENSG00000112902_af	Q13591	AD	0.0267617	0.0052149		0.155837	0.0332837
ENSG00000112787_af	Q9HCM7	AD	0.0268285	0.00522636		0.0317516	0.00701433
ENSG00000240432_af	Q3SY46	AD	0.0268496	0.00523782		0.00664663	0.00150143
ENSG00000132872_af	Q9H2B2	AD	0.0269486	0.00524928		0.334815	0.0702464
ENSG00000254671_af	O14681	AD	0.0269733	0.00526074		0.0104007	0.00223496
ENSG00000149547_af	O14681	AD	0.0269733	0.00527221		0.0104008	0.00224642
ENSG00000182264_af	Q8IYV9	AD	0.0270148	0.00528367		0.13635	0.0290659
ENSG00000187266_af	P19235	AD	0.0271856	0.00529513		0.0263473	0.00593696
ENSG00000110900_af	A1L157	AD	0.0272004	0.00530659		0.197851	0.0421089
ENSG00000108684_af	Q16515	AD	0.0272065	0.00531805		0.0192269	0.004149
ENSG00000214655_af	A7E2V4	AD	0.0272267	0.00532951		0.0356524	0.00788539
ENSG00000089723_af	Q96DC9	AD	0.027249	0.00534097		0.359427	0.0754269
ENSG00000231889_af	O43734	AD	0.0273717	0.00535244		0.127242	0.0270143
ENSG00000056972_af	O43734	AD	0.0273717	0.0053639		0.127242	0.0270029
ENSG00000203859_af	P26439	AD	0.0273843	0.00537536		0.160146	0.0343725
ENSG00000181016_af	Q8N8F7	AD	0.0273873	0.00538682		0.282162	0.0594957
ENSG00000134759_af	Q6IA86	AD	0.0274856	0.00539828		0.04867	0.0106705
ENSG00000109787_af	P57682	AD	0.0276767	0.00540974		0.0040588	0.000928367
ENSG00000122733_af	Q9UPV7	AD	0.0277552	0.0054212		0.051129	0.0114155
ENSG00000115590_af	P27930	AD	0.0278225	0.00543266		0.225412	0.0476332
ENSG00000066117_af	Q96GM5	AD	0.0278335	0.00544413		0.0108269	0.00233811
ENSG00000107249_af	Q8NEA6	AD	0.0279138	0.00545559		0.143246	0.0306246
ENSG00000165392_af	Q14191	AD	0.0279208	0.00546705		0.0234491	0.00531805
ENSG00000181698_af	Q8NG75	AD	0.0279432	0.00547851		0.0170075	0.00370201
ENSG00000136327_af	O15522	AD	0.027952	0.00548997		0.164337	0.0350372
ENSG00000162779_af	Q5T1B0	AD	0.0280194	0.00550143		0.264953	0.0559542
ENSG00000106635_af	Q9BQE9	AD	0.0280349	0.00551289		0.260968	0.0551289
ENSG00000163683_af	Q96QK8	AD	0.028141	0.00552436		0.0222176	0.0050659
ENSG00000125903_af	Q9H1M3	AD	0.0281686	0.00553582		0.167035	0.0355989
ENSG00000166148_af	P37288	AD	0.0282496	0.00554728		0.13236	0.0280573
ENSG00000261317_af	B2RD01	AD	0.028279	0.00555874		0.0470813	0.0102808
ENSG00000177946_af	B2RD01	AD	0.028279	0.0055702		0.0470822	0.0102923
ENSG00000235718_af	Q9BY79	AD	0.0286147	0.00558166		0.0836626	0.0178567
ENSG00000259159_af	Q9BY79	AD	0.0286147	0.00559312		0.0836636	0.0178682
ENSG00000223953_af	Q9BY79	AD	0.0286147	0.00560458		0.0836625	0.0178453
ENSG00000147869_af	O95813	AD	0.0286945	0.00561605		0.0459768	0.010086
ENSG00000124126_af	Q8TCU6	AD	0.0287317	0.00562751		0.067983	0.014659
ENSG00000123349_af	Q99471	AD	0.0288522	0.00563897		0.00979684	0.00205158
ENSG00000101082_af	Q9H6Q3	AD	0.0289954	0.00565043		0.132698	0.0281375
ENSG00000189366_af	Q6GMV1	AD	0.0290161	0.00566189		0.260557	0.0550029
ENSG00000076650_af	Q9BRR8	AD	0.0290938	0.00567335		0.222682	0.0471289
ENSG00000163874_af	Q5D1E8	AD	0.0291031	0.00568481		0.0687691	0.0148883
ENSG00000137656_af	Q9BRD0	AD	0.0291096	0.00569628		0.106718	0.0225903
ENSG00000170322_af	Q6P4R8	AD	0.0291789	0.00570774		0.122976	0.0260172
ENSG00000139910_af	P51513	AD	0.0292935	0.0057192		0.247654	0.0521032
ENSG00000164684_af	Q6ZNC4	AD	0.0293638	0.00573066		0.0909383	0.0192894
ENSG00000080189_af	Q9NQQ7	AD	0.0293762	0.00574212		0.169171	0.0359656
ENSG00000234661_af	O00533	AD	0.0294462	0.00575358		0.0593196	0.0129169
ENSG00000185591_af	P08047	AD	0.0295235	0.00576504		0.471178	0.0980974
ENSG00000265817_af	Q9Y620	AD	0.0296873	0.0057765		0.00882488	0.00193696
ENSG00000160013_af	P43119	AD	0.029709	0.00578797		0.11531	0.024298
ENSG00000176912_af	Q15846	AD	0.0297548	0.00579943		0.14352	0.030659
ENSG00000170949_af	Q9HCG1	AD	0.0297577	0.00581089		0.0205735	0.00453868
ENSG00000214941_af	Q19AV6	AD	0.0297733	0.00582235		0.296689	0.0623725
ENSG00000173762_af	P09564	AD	0.0297854	0.00583381		0.0826791	0.0176619
ENSG00000129988_af	P18428	AD	0.0298244	0.00584527		0.366403	0.0766991
ENSG00000113240_af	Q9HAZ1	AD	0.02984	0.00585673		0.0240208	0.00545559
ENSG00000032389_af	Q53HC9	AD	0.0298513	0.00586819		0.0148054	0.00330086
ENSG00000168309_af	O95990	AD	0.0298869	0.00587966		0.0514792	0.0114957
ENSG00000177096_af	Q6ICB4	AD	0.0300131	0.00589112		0.243575	0.0513123
ENSG00000011143_af	Q9NXB0	AD	0.0300969	0.00590258		0.200771	0.0426705
ENSG00000115419_af	O94925	AD	0.0300998	0.00591404		0.161319	0.0345559
ENSG00000170836_af	O15297	AD	0.0302469	0.0059255		0.099444	0.0209169
ENSG00000130731_af	Q96S19	AD	0.0303434	0.00593696		0.0245004	0.00554728
ENSG00000232284_af	Q5T9L3	AD	0.0303509	0.00594842		0.0957979	0.0201261
ENSG00000124279_af	Q14CZ7	AD	0.0304151	0.00595989		0.137924	0.0294556
ENSG00000165474_af	P29033	AD	0.0304408	0.00597135		0.132929	0.0281948
ENSG00000261054_af	O15061	AD	0.0305076	0.00598281		0.0871901	0.0186017
ENSG00000111641_af	P46087	AD	0.0305718	0.00599427		0.216829	0.0460057
ENSG00000129696_af	Q6NXR4	AD	0.0306886	0.00600573		0.17396	0.0370086
ENSG00000172159_af	A2A2Y4	AD	0.0306955	0.00601719		0.0228592	0.00516905
ENSG00000163632_af	Q6I9Y2	AD	0.0308201	0.00602865		0.0501084	0.011106
ENSG00000163634_af	Q6I9Y2	AD	0.0308201	0.00604011		0.0501084	0.0111175
ENSG00000226871_af	O94989	AD	0.0308704	0.00605158		0.125113	0.0264871
ENSG00000173626_af	Q8N5C1	AD	0.0308806	0.00606304		0.131842	0.0279427
ENSG00000178033_af	Q8N5C1	AD	0.0308806	0.0060745		0.131842	0.0279542
ENSG00000148841_af	Q8IWB1	AD	0.0308993	0.00608596		0.305552	0.0643438
ENSG00000175931_af	Q9C0C9	AD	0.0309551	0.00609742		0.138846	0.0297192
ENSG00000174948_af	Q86SP6	AD	0.0309677	0.00610888		0.0246104	0.00555874
ENSG00000153234_af	P43354	AD	0.0309972	0.00612034		0.205584	0.043702
ENSG00000116260_af	O00391	AD	0.0310003	0.00613181		0.0161956	0.00355301
ENSG00000170469_af	Q86W54	AD	0.0310928	0.00614327		0.0309411	0.00686533
ENSG00000125878_af	Q12870	AD	0.0311128	0.00615473		0.00238742	0.000561605
ENSG00000165841_af	P33261	AD	0.0311661	0.00616619		0.0481167	0.0105559
ENSG00000203995_af	Q6WRX3	AD	0.0311962	0.00617765		0.185803	0.0394155
ENSG00000153815_af	Q8IY22	AD	0.0312717	0.00618911		0.128574	0.0272321
ENSG00000260741_af	P51170	AD	0.0313505	0.00620057		0.0818906	0.01749
ENSG00000100376_af	Q9NWS6	AD	0.0313976	0.00621203		0.0402203	0.00877937
ENSG00000197721_af	Q2VPA4	AD	0.0314418	0.0062235		0.0577436	0.0126418
ENSG00000116198_af	O60308	AD	0.0314529	0.00623496		0.0201944	0.00443553
ENSG00000253567_af	Q8IX29	AD	0.0315086	0.00624642		0.198313	0.0422464
ENSG00000058799_af	Q9Y548	AD	0.0316411	0.00625788		0.164189	0.0349685
ENSG00000066032_af	P26232	AD	0.0317882	0.00626934		0.149439	0.031851
ENSG00000173226_af	Q15051	AD	0.0318164	0.0062808		0.545278	0.112688
ENSG00000179270_af	A6NGG8	AD	0.0318304	0.00629226		0.203966	0.0433696
ENSG00000108878_af	Q06432	AD	0.0318568	0.00630372		0.0210241	0.00473352
ENSG00000117597_af	Q68CQ4	AD	0.0320632	0.00631519		0.0123018	0.00270487
ENSG00000172031_af	Q8IUS5	AD	0.0321381	0.00632665		0.0114588	0.00246418
ENSG00000177675_af	Q9NR16	AD	0.0323282	0.00633811		0.355313	0.0744986
ENSG00000185823_af	Q9NZP6	AD	0.0324126	0.00634957		0.105305	0.022235
ENSG00000166377_af	O43861	AD	0.032424	0.00636103		0.0519759	0.0115186
ENSG00000182253_af	O15061	AD	0.0324549	0.00637249		0.0992247	0.0208481
ENSG00000255223_af	Q96RB7	AD	0.0324551	0.00638395		0.0648595	0.013914
ENSG00000135436_af	Q8IYM0	AD	0.0325823	0.00639542		0.0657869	0.0141433
ENSG00000158941_af	Q8N163	AD	0.0327716	0.00640688		0.0321942	0.00723209
ENSG00000267680_af	Q9NZL3	AD	0.0328325	0.00641834		0.0309552	0.00687679
ENSG00000131373_af	Q9UJ83	AD	0.0328573	0.0064298		0.151956	0.0323324
ENSG00000253200_af	Q8N163	AD	0.033007	0.00644126		0.0326072	0.0072894
ENSG00000185480_af	Q9NWS1	AD	0.0330361	0.00645272		0.0510749	0.0113811
ENSG00000162426_af	Q9Y2W3	AD	0.0331264	0.00646418		0.0991438	0.0208252
ENSG00000138795_af	Q9UJU2	AD	0.0331293	0.00647564		0.117985	0.0249284
ENSG00000144868_af	Q6UXF1	AD	0.0332333	0.00648711		0.119002	0.0251461
ENSG00000109066_af	Q8NE00	AD	0.0333064	0.00649857		0.124008	0.0262235
ENSG00000121691_af	P04040	AD	0.0333427	0.00651003		0.153931	0.0328825
ENSG00000163935_af	Q9UHJ3	AD	0.0333599	0.00652149		0.0893621	0.0190602
ENSG00000183760_af	Q6ZNF0	AD	0.0334506	0.00653295		0.0987718	0.0207794
ENSG00000159387_af	P78412	AD	0.0335176	0.00654441		0.262722	0.0555186
ENSG00000259283_af	P78412	AD	0.0335176	0.00655587		0.262722	0.0555301
ENSG00000149503_af	Q9NQS7	AD	0.0335582	0.00656734		0.0351996	0.00774785
ENSG00000224218_af	Q8TF72	AD	0.0335783	0.0065788		0.284964	0.0601261
ENSG00000146592_af	Q02930	AD	0.0336784	0.00659026		0.0668859	0.0143954
ENSG00000167202_af	Q9UPU7	AD	0.0337601	0.00660172		0.127008	0.0269341
ENSG00000067064_af	Q13907	AD	0.033809	0.00661318		0.0100863	0.00215473
ENSG00000254638_af	Q9BXU0	AD	0.0338182	0.00662464		0.156355	0.0333983
ENSG00000150783_af	Q9BXU0	AD	0.0338182	0.0066361		0.156353	0.0333868
ENSG00000158163_af	Q8IYY4	AD	0.0338946	0.00664756		0.546374	0.112928
ENSG00000243477_af	Q93015	AD	0.0339561	0.00665903		0.209462	0.0445731
ENSG00000162300_af	O95159	AD	0.03408	0.00667049		0.259413	0.0547622
ENSG00000187066_af	O95159	AD	0.03408	0.00668195		0.259413	0.0547507
ENSG00000106976_af	Q05193	AD	0.0340889	0.00669341		0.228254	0.0483209
ENSG00000151715_af	Q96B21	AD	0.0341732	0.00670487		0.0983264	0.0206648
ENSG00000049283_af	Q9H201	AD	0.0342044	0.00671633		0.0490877	0.0108653
ENSG00000102890_af	Q96BJ8	AD	0.0342396	0.00672779		0.0886385	0.0189112
ENSG00000176219_af	Q8NGC7	AD	0.0342999	0.00673926		0.767044	0.156711
ENSG00000172987_af	Q8WWQ2	AD	0.0344298	0.00675072		0.0100941	0.00216619
ENSG00000187736_af	Q9H9Q4	AD	0.0344404	0.00676218		0.0888374	0.0189226
ENSG00000213625_af	O15243	AD	0.0344702	0.00677364		0.00385468	0.000893983
ENSG00000196782_af	Q96JK9	AD	0.0345139	0.0067851		0.0475446	0.010384
ENSG00000242485_af	Q9BYC9	AD	0.034701	0.00679656		0.171494	0.0364585
ENSG00000113100_af	Q9ULB4	AD	0.0347471	0.00680802		0.0341057	0.00765616
ENSG00000204352_af	Q5T035	AD	0.0348359	0.00681948		0.0448574	0.00979943
ENSG00000111404_af	O75747	AD	0.0350022	0.00683095		0.0926141	0.0195645
ENSG00000235513_af	Q969R5	AD	0.0350101	0.00684241		0.0166534	0.0036447
ENSG00000171067_af	Q96F05	AD	0.0350461	0.00685387		0.0898271	0.0191519
ENSG00000113739_af	O76061	AD	0.0350684	0.00686533		0.0297793	0.0065788
ENSG00000167748_af	P06870	AD	0.0351103	0.00687679		0.505637	0.105054
ENSG00000198183_af	Q9NP55	AD	0.0351269	0.00688825		0.0236217	0.0053639
ENSG00000197937_af	Q96SE7	AD	0.0352541	0.00689971		0.171252	0.0364241
ENSG00000136546_af	Q01118	AD	0.0352544	0.00691117		0.227029	0.0481032
ENSG00000177462_af	A6NH00	AD	0.0352921	0.00692264		0.0831771	0.0177765
ENSG00000197079_af	Q92764	AD	0.0353073	0.0069341		0.150731	0.0321146
ENSG00000143771_af	Q9P003	AD	0.0353897	0.00694556		0.0252259	0.00563897
ENSG00000108679_af	Q08380	AD	0.0354003	0.00695702		0.0166232	0.00363324
ENSG00000093167_af	Q9Y608	AD	0.0354461	0.00696848		0.0118056	0.00259026
ENSG00000105639_af	P52333	AD	0.0354777	0.00697994		0.236755	0.0498109
ENSG00000255800_af	Q8NGS8	AD	0.0354785	0.0069914		0.0306941	0.00680802
ENSG00000198839_af	Q9NRM2	AD	0.03552	0.00700287		0.122751	0.025937
ENSG00000125533_af	Q8NDY6	AD	0.0357384	0.00701433		0.0269471	0.00608596
ENSG00000152492_af	Q8IVM0	AD	0.0357946	0.00702579		0.0108603	0.00234957
ENSG00000125450_af	Q9BW27	AD	0.0359441	0.00703725		0.261732	0.0552321
ENSG00000177156_af	P37837	AD	0.0361129	0.00704871		0.0505036	0.0112321
ENSG00000183044_af	P80404	AD	0.0361434	0.00706017		0.173121	0.0368367
ENSG00000164418_af	Q13002	AD	0.0364431	0.00707163		0.0693159	0.0150143
ENSG00000196418_af	Q15973	AD	0.0365126	0.00708309		0.166041	0.0354155
ENSG00000273419_af	O60290	AD	0.0366247	0.00709456		0.0210897	0.00476791
ENSG00000105402_af	P54920	AD	0.0366648	0.00710602		0.0318639	0.00710602
ENSG00000158528_af	Q9ULJ8	AD	0.0366702	0.00711748		0.0586602	0.0128138
ENSG00000213988_af	Q03938	AD	0.0367463	0.00712894		0.342481	0.0719312
ENSG00000136048_af	Q8N682	AD	0.0368204	0.0071404		0.0696659	0.0150831
ENSG00000164674_af	Q4VX76	AD	0.036853	0.00715186		0.0272245	0.00613181
ENSG00000152102_af	A1KXE4	AD	0.0368882	0.00716332		0.116729	0.0246074
ENSG00000144962_af	Q9BXB7	AD	0.036932	0.00717479		0.0778744	0.0166418
ENSG00000100395_af	Q969R5	AD	0.0369447	0.00718625		0.0266844	0.00600573
ENSG00000136108_af	Q8WWK9	AD	0.0369476	0.00719771		0.255404	0.0540287
ENSG00000091137_af	O43511	AD	0.0369954	0.00720917		0.333529	0.0699828
ENSG00000136274_af	O15069	AD	0.0370946	0.00722063		0.191444	0.0405731
ENSG00000178229_af	Q08ER8	AD	0.0371788	0.00723209		0.0584373	0.012745
ENSG00000118369_af	Q9P2H5	AD	0.0372618	0.00724355		0.153563	0.0327794
ENSG00000073111_af	P49736	AD	0.0373219	0.00725501		0.0740373	0.0159656
ENSG00000163704_af	Q5FWE3	AD	0.0373801	0.00726648		0.0368422	0.00821777
ENSG00000101146_af	P78406	AD	0.0373836	0.00727794		0.130466	0.0275874
ENSG00000165684_af	Q5SXM2	AD	0.0374019	0.0072894		0.0451973	0.00985673
ENSG00000150628_af	Q8NEY3	AD	0.0375437	0.00730086		0.27974	0.0590258
ENSG00000112514_af	O60888	AD	0.0376091	0.00731232		0.0986722	0.0207106
ENSG00000115425_af	Q9BY49	AD	0.0377048	0.00732378		0.200586	0.0426476
ENSG00000164253_af	Q9HAD4	AD	0.0378044	0.00733524		0.020271	0.00446991
ENSG00000100599_af	Q8TB24	AD	0.0378924	0.0073467		0.0316125	0.00700287
ENSG00000135951_af	Q9BZW7	AD	0.0379294	0.00735817		0.0817539	0.0174556
ENSG00000148948_af	Q9HCJ2	AD	0.03794	0.00736963		0.037713	0.00842407
ENSG00000188987_af	P62805	AD	0.0380835	0.00738109		0.0860168	0.0183954
ENSG00000234527_af	Q9HC56	AD	0.0380892	0.00739255		0.276136	0.0581089
ENSG00000165309_af	Q5W041	AD	0.0381545	0.00740401		0.900532	0.182418
ENSG00000177932_af	Q86Y25	AD	0.038171	0.00741547		0.0480205	0.0105215
ENSG00000134452_af	Q8NFZ0	AD	0.0381839	0.00742693		0.00544887	0.00126074
ENSG00000092200_af	Q96KN7	AD	0.0382225	0.0074384		0.105472	0.0222923
ENSG00000115138_af	P01189	AD	0.0382245	0.00744986		0.029051	0.00649857
ENSG00000145390_af	Q70EK8	AD	0.0382254	0.00746132		0.373868	0.0780516
ENSG00000197859_af	Q86TH1	AD	0.0382365	0.00747278		0.0109669	0.00236103
ENSG00000255872_af	Q5SYB0	AD	0.0382954	0.00748424		0.292077	0.0616046
ENSG00000070601_af	Q5SYB0	AD	0.0382954	0.0074957		0.292077	0.061616
ENSG00000130640_af	Q9BSJ2	AD	0.038338	0.00750716		0.0293849	0.00654441
ENSG00000180479_af	Q7Z3V5	AD	0.0383402	0.00751862		0.0359733	0.008
ENSG00000267470_af	Q7Z3V5	AD	0.0383402	0.00753009		0.0359734	0.00801146
ENSG00000171817_af	Q7Z3V5	AD	0.0383402	0.00754155		0.0359733	0.00798854
ENSG00000173141_af	Q9BQC6	AD	0.0385552	0.00755301		0.0140965	0.00310602
ENSG00000162923_af	Q9H7D7	AD	0.0385821	0.00756447		0.0854433	0.0182464
ENSG00000088812_af	O75882	AD	0.0385874	0.00757593		0.46653	0.0970315
ENSG00000243489_af	P60412	AD	0.0386705	0.00758739		0.087443	0.0186476
ENSG00000136695_af	Q9UBH0	AD	0.038724	0.00759885		0.0344657	0.00766762
ENSG00000169783_af	Q96FE5	AD	0.0387272	0.00761032		0.159459	0.0342006
ENSG00000180176_af	P07101	AD	0.0387513	0.00762178		0.0761593	0.0164011
ENSG00000105711_af	Q07699	AD	0.0388656	0.00763324		0.045687	0.00995989
ENSG00000132952_af	Q5W0Q7	AD	0.0388752	0.0076447		0.00853764	0.00185673
ENSG00000085999_af	Q92698	AD	0.0388814	0.00765616		0.0460725	0.0100974
ENSG00000086504_af	Q13084	AD	0.0389026	0.00766762		0.366408	0.0767106
ENSG00000155760_af	O75084	AD	0.0389261	0.00767908		0.194836	0.041341
ENSG00000143368_af	Q15427	AD	0.0390121	0.00769054		0.00607553	0.00137536
ENSG00000060069_af	Q9Y5B0	AD	0.0392169	0.00770201		0.0302018	0.00664756
ENSG00000076003_af	Q14566	AD	0.0392518	0.00771347		0.148946	0.031702
ENSG00000080815_af	P49768	AD	0.0392565	0.00772493		0.779937	0.159415
ENSG00000119231_af	Q96HI0	AD	0.0393718	0.00773639		0.057172	0.0124814
ENSG00000164600_af	Q96NK8	AD	0.0393869	0.00774785		0.0324501	0.00726648
ENSG00000113905_af	P04196	AD	0.0393881	0.00775931		0.0865557	0.0184642
ENSG00000133111_af	O00287	AD	0.0394782	0.00777077		0.153238	0.0326991
ENSG00000129810_af	Q5FBB7	AD	0.0394884	0.00778223		0.193839	0.0411232
ENSG00000137821_af	Q8IUZ0	AD	0.0395067	0.0077937		0.00734801	0.00161605
ENSG00000230082_af	Q5FWE3	AD	0.0395716	0.00780516		0.082477	0.0175817
ENSG00000196482_af	P62508	AD	0.0397212	0.00781662		0.125448	0.0265559
ENSG00000162888_af	Q96MC9	AD	0.0397237	0.00782808		0.555709	0.114865
ENSG00000113407_af	P26639	AD	0.0398722	0.00783954		0.105	0.0220974
ENSG00000170017_af	Q13740	AD	0.0398733	0.007851		0.00708249	0.0015702
ENSG00000068784_af	Q8N5C6	AD	0.0398802	0.00786246		0.184503	0.039106
ENSG00000162458_af	Q8WUP2	AD	0.0399528	0.00787393		0.0237525	0.00539828
ENSG00000072274_af	P02786	AD	0.0401828	0.00788539		0.327782	0.068745
ENSG00000138246_af	O75165	AD	0.040187	0.00789685		0.138695	0.0296619
ENSG00000142611_af	Q9HAZ2	AD	0.0402354	0.00790831		0.0649017	0.013937
ENSG00000176022_af	Q96L58	AD	0.0402372	0.00791977		0.0446617	0.00975358
ENSG00000232382_af	Q8NHB7	AD	0.0403792	0.00793123		0.646037	0.132504
ENSG00000174348_af	Q7Z5L7	AD	0.040415	0.00794269		0.268663	0.0567106
ENSG00000179921_af	Q8TDU6	AD	0.0404234	0.00795415		0.192773	0.0408711
ENSG00000135953_af	Q8NBP5	AD	0.0406009	0.00796562		0.358249	0.0751404
ENSG00000108424_af	Q14974	AD	0.0407922	0.00797708		0.0220948	0.00499713
ENSG00000206013_af	A6NNB3	AD	0.0408229	0.00798854		0.502255	0.104355
ENSG00000232581_af	Q9NPG8	AD	0.0409047	0.008		0.0912978	0.0193352
ENSG00000136247_af	Q9NPG8	AD	0.0409047	0.00801146		0.0912979	0.0193467
ENSG00000114646_af	O95196	AD	0.0409261	0.00802292		0.0692721	0.0150029
ENSG00000111229_af	O15145	AD	0.0410915	0.00803438		0.0597145	0.0129857
ENSG00000177694_af	Q58DX5	AD	0.0410997	0.00804585		0.0923864	0.0195415
ENSG00000174226_af	Q8N9S9	AD	0.0411777	0.00805731		0.00638833	0.00146705
ENSG00000132141_af	Q92526	AD	0.0412224	0.00806877		0.000406883	0.000114613
ENSG00000121377_af	Q9NYW3	AD	0.041258	0.00808023		0.233688	0.0493295
ENSG00000115289_af	Q9BSM1	AD	0.0412632	0.00809169		0.037258	0.00832092
ENSG00000184277_af	Q9BRN9	AD	0.0413059	0.00810315		0.0734955	0.0159427
ENSG00000183615_af	Q9BTA0	AD	0.0413535	0.00811461		0.140389	0.0300287
ENSG00000171496_af	Q8NGR8	AD	0.0413585	0.00812607		0.211666	0.0451117
ENSG00000086289_af	Q8N427	AD	0.0413681	0.00813754		0.0176246	0.0037937
ENSG00000086288_af	Q8N427	AD	0.0413681	0.008149		0.0176246	0.00380516
ENSG00000232993_af	Q7Z5L7	AD	0.041399	0.00816046		0.272734	0.057341
ENSG00000184908_af	P51801	AD	0.0415613	0.00817192		0.367754	0.0769742
ENSG00000152422_af	Q13426	AD	0.0416001	0.00818338		0.352655	0.0740401
ENSG00000186314_af	Q8N945	AD	0.0418004	0.00819484		0.666901	0.136791
ENSG00000105229_af	Q8N2W9	AD	0.0418145	0.0082063		0.192319	0.0407679
ENSG00000163961_af	Q8IYW5	AD	0.0418162	0.00821777		0.0251624	0.00562751
ENSG00000116918_af	Q99598	AD	0.0418228	0.00822923		0.0456773	0.00994842
ENSG00000099901_af	Q8IZ69	AD	0.0418392	0.00824069		0.0159463	0.0034957
ENSG00000137312_af	O75955	AD	0.0418674	0.00825215		0.0885914	0.0188883
ENSG00000111843_af	Q9P0S9	AD	0.0419927	0.00826361		0.0133866	0.00297994
ENSG00000253215_af	Q08830	AD	0.0420043	0.00827507		0.139891	0.0299713
ENSG00000105676_af	Q6NXE6	AD	0.0420563	0.00828653		0.113918	0.0238395
ENSG00000105675_af	P20648	AD	0.0421612	0.00829799		0.119542	0.0253295
ENSG00000213221_af	Q5SXM8	AD	0.0421785	0.00830946		0.787832	0.16086
ENSG00000115155_af	Q9HC10	AD	0.0422117	0.00832092		0.656821	0.134808
ENSG00000130202_af	Q92692	AD	0.0423072	0.00833238		0.036655	0.00816046
ENSG00000141458_af	O15118	AD	0.0424229	0.00834384		0.0113944	0.00245272
ENSG00000122965_af	Q9Y4C8	AD	0.0424311	0.0083553		0.514391	0.106648
ENSG00000163701_af	Q8NFR9	AD	0.0425055	0.00836676		0.481185	0.0998854
ENSG00000163009_af	Q96LS8	AD	0.0425154	0.00837822		0.0662996	0.0142923
ENSG00000163812_af	Q9NYG2	AD	0.0425586	0.00838968		0.129076	0.0273238
ENSG00000070010_af	Q92890	AD	0.042598	0.00840115		0.422366	0.0881146
ENSG00000152939_af	Q8N4S9	AD	0.0426043	0.00841261		0.0244491	0.00553582
ENSG00000167395_af	O15015	AD	0.0426316	0.00842407		0.208844	0.0444241
ENSG00000135747_af	Q8IW36	AD	0.0426449	0.00843553		0.339311	0.0711977
ENSG00000197472_af	Q8IW36	AD	0.0426449	0.00844699		0.339315	0.0712092
ENSG00000116161_af	Q9HB71	AD	0.0427843	0.00845845		0.23858	0.050235
ENSG00000137038_af	Q96GE9	AD	0.0428164	0.00846991		0.0134119	0.0029914
ENSG00000221900_af	Q8N7R1	AD	0.0429127	0.00848138		0.730662	0.149444
ENSG00000177463_af	P49116	AD	0.0429301	0.00849284		0.104931	0.0220745
ENSG00000145975_af	Q8IXS0	AD	0.0429629	0.0085043		0.190313	0.0402407
ENSG00000168781_af	Q6PFW1	AD	0.0430761	0.00851576		0.113635	0.0237937
ENSG00000006634_af	Q9UBU7	AD	0.0431311	0.00852722		0.184932	0.0392321
ENSG00000162571_af	Q6ZVT0	AD	0.0432006	0.00853868		0.0115988	0.00252149
ENSG00000165312_af	Q5VV17	AD	0.0432729	0.00855014		0.15278	0.032596
ENSG00000205581_af	P05114	AD	0.0433664	0.0085616		0.16541	0.035255
ENSG00000077092_af	P10826	AD	0.0434489	0.00857307		0.078875	0.016894
ENSG00000074966_af	P42681	AD	0.0434651	0.00858453		0.286515	0.0604928
ENSG00000141349_af	Q9BUM1	AD	0.0434745	0.00859599		0.327263	0.0686533
ENSG00000230289_af	Q9Y6A1	AD	0.0437519	0.00860745		0.195007	0.0413754
ENSG00000176177_af	Q8IYW4	AD	0.0437833	0.00861891		0.551686	0.11404
ENSG00000162461_af	Q6PIV7	AD	0.0438066	0.00863037		0.157413	0.0337536
ENSG00000266921_af	Q12901	AD	0.0438847	0.00864183		0.177271	0.0378109
ENSG00000145016_af	Q92622	AD	0.0438874	0.0086533		0.126479	0.0267507
ENSG00000131165_af	Q9HD42	AD	0.0439138	0.00866476		0.0683876	0.0147507
ENSG00000109944_af	Q6NUN7	AD	0.0443174	0.00867622		0.17085	0.0362636
ENSG00000137265_af	Q15306	AD	0.0443256	0.00868768		0.0494621	0.0109456
ENSG00000257671_af	P08729	AD	0.0443573	0.00869914		0.0141536	0.00312894
ENSG00000109079_af	Q13829	AD	0.0443619	0.0087106		0.118908	0.0251232
ENSG00000176358_af	Q86UU9	AD	0.0443767	0.00872206		0.0124123	0.00272779
ENSG00000205329_af	Q9NZP0	AD	0.0444151	0.00873352		0.0423043	0.00922636
ENSG00000117592_af	P30041	AD	0.0444356	0.00874499		0.5012	0.104011
ENSG00000179909_af	Q13106	AD	0.0444426	0.00875645		0.0889321	0.0189685
ENSG00000198799_af	O94898	AD	0.0445261	0.00876791		0.353303	0.0741662
ENSG00000184530_af	Q6P5S2	AD	0.044609	0.00877937		0.204927	0.0435759
ENSG00000084636_af	Q07092	AD	0.0446136	0.00879083		0.0889196	0.018957
ENSG00000196405_af	Q9UI08	AD	0.0447176	0.00880229		0.119733	0.0253983
ENSG00000183655_af	Q9H0H3	AD	0.0447238	0.00881375		0.20573	0.0437364
ENSG00000170608_af	P55318	AD	0.0448087	0.00882521		0.392551	0.0816963
ENSG00000164509_af	Q8NI17	AD	0.0448226	0.00883668		0.165733	0.0353467
ENSG00000099937_af	P05546	AD	0.044842	0.00884814		0.0291744	0.00652149
ENSG00000267706_af	Q8N5Q1	AD	0.0448555	0.0088596		0.342197	0.0719083
ENSG00000229127_af	A0AUZ9	AD	0.0452148	0.00887106		0.101934	0.0214327
ENSG00000092203_af	O94842	AD	0.0452157	0.00888252		0.0359966	0.00802292
ENSG00000072364_af	Q9UHB7	AD	0.0454021	0.00889398		0.0653825	0.0140401
ENSG00000100299_af	P15289	AD	0.0454125	0.00890544		0.00300717	0.000676218
ENSG00000118961_af	Q9H6V9	AD	0.0454391	0.00891691		0.274435	0.0577192
ENSG00000092148_af	Q9ULT8	AD	0.0454409	0.00892837		0.022688	0.00512321
ENSG00000140795_af	Q32MK0	AD	0.0454584	0.00893983		0.106552	0.0225559
ENSG00000188312_af	O94769	AD	0.0455154	0.00895129		0.102844	0.021616
ENSG00000106823_af	O94769	AD	0.0455154	0.00896275		0.102844	0.0216275
ENSG00000177119_af	Q4KMQ2	AD	0.0455421	0.00897421		0.142841	0.0305559
ENSG00000152223_af	Q9HCE0	AD	0.0455678	0.00898567		0.295204	0.062086
ENSG00000172403_af	Q9UMS6	AD	0.0455746	0.00899713		0.107768	0.0227163
ENSG00000162302_af	O75676	AD	0.0456767	0.0090086		0.171209	0.0364126
ENSG00000160746_af	Q9NW15	AD	0.0456846	0.00902006		0.172334	0.036745
ENSG00000117407_af	Q5T4W7	AD	0.0457567	0.00903152		0.0604109	0.0131003
ENSG00000104826_af	P01229	AD	0.0458219	0.00904298		0.144156	0.030808
ENSG00000158859_af	O75173	AD	0.045865	0.00905444		0.164736	0.0351519
ENSG00000161509_af	Q14957	AD	0.0460802	0.0090659		0.0623924	0.0135129
ENSG00000237568_af	Q96PP8	AD	0.0461183	0.00907736		0.223393	0.0473009
ENSG00000154451_af	Q96PP8	AD	0.0461183	0.00908883		0.223393	0.0473123
ENSG00000112379_af	Q5TH69	AD	0.046135	0.00910029		0.066267	0.0142693
ENSG00000004779_af	O14561	AD	0.0461429	0.00911175		0.0267533	0.00602865
ENSG00000268656_af	Q9H477	AD	0.0461888	0.00912321		0.279306	0.0588997
ENSG00000124664_af	O95238	AD	0.046289	0.00913467		0.0290483	0.00648711
ENSG00000123737_af	Q06265	AD	0.0463001	0.00914613		0.0301208	0.0066361
ENSG00000136819_af	Q9NZ63	AD	0.0463545	0.00915759		0.0889588	0.0190029
ENSG00000091010_af	Q15319	AD	0.0464249	0.00916905		0.0193461	0.00418338
ENSG00000250025_af	Q15319	AD	0.0464249	0.00918052		0.0193461	0.00419484
ENSG00000100479_af	P56282	AD	0.0464928	0.00919198		0.0425528	0.00931805
ENSG00000015520_af	Q9UHC9	AD	0.0465111	0.00920344		0.0661783	0.0142464
ENSG00000165626_af	Q8N7W2	AD	0.0466933	0.0092149		0.12185	0.0257765
ENSG00000188269_af	Q15622	AD	0.0467335	0.00922636		0.136288	0.0290315
ENSG00000166289_af	Q96S99	AD	0.0467493	0.00923782		0.0704127	0.0152665
ENSG00000103168_af	Q15572	AD	0.0468039	0.00924928		0.0176592	0.00381662
ENSG00000204576_af	P79522	AD	0.0468778	0.00926074		0.0204759	0.00451576
ENSG00000100077_af	P35626	AD	0.0469373	0.00927221		0.0258023	0.00579943
ENSG00000141748_af	A6NH57	AD	0.04698	0.00928367		0.0133797	0.00296848
ENSG00000198216_af	Q15878	AD	0.0469923	0.00929513		0.884025	0.179083
ENSG00000096093_af	Q5JVL4	AD	0.0470119	0.00930659		0.013038	0.00284241
ENSG00000136021_af	Q6P3W7	AD	0.0470145	0.00931805		0.181217	0.0386476
ENSG00000233041_af	C9JFL3	AD	0.0470314	0.00932951		0.1395	0.0298567
ENSG00000143641_af	Q10471	AD	0.0471571	0.00934097		0.0766292	0.0164814
ENSG00000007908_af	P16581	AD	0.0472985	0.00935244		0.0572256	0.0125158
ENSG00000182261_af	Q86W26	AD	0.0473123	0.0093639		0.0814589	0.0173524
ENSG00000175854_af	Q1ZZU3	AD	0.0475006	0.00937536		0.119033	0.0251691
ENSG00000206417_af	Q92522	AD	0.0475324	0.00938682		0.122412	0.0258797
ENSG00000149633_af	Q5JYT7	AD	0.0476266	0.00939828		0.256067	0.0541662
ENSG00000165071_af	Q6P5X7	AD	0.0476534	0.00940974		0.043209	0.00947851
ENSG00000127870_af	Q9Y252	AD	0.04775	0.0094212		0.0686884	0.0148539
ENSG00000180098_af	Q9NX07	AD	0.0477721	0.00943266		0.0408089	0.00884814
ENSG00000138777_af	Q9H2U2	AD	0.0477727	0.00944413		0.142739	0.03051
ENSG00000204695_af	Q9UGF5	AD	0.0477756	0.00945559		0.363987	0.0761834
ENSG00000146834_af	Q7L2J0	AD	0.0480361	0.00946705		0.0663842	0.0143152
ENSG00000188895_af	Q68DK7	AD	0.0480427	0.00947851		0.0621894	0.01349
ENSG00000143493_af	Q9NVH2	AD	0.0480898	0.00948997		0.018541	0.00402292
ENSG00000088833_af	Q9UNZ2	AD	0.0481558	0.00950143		0.190489	0.0402865
ENSG00000114745_af	Q9BQQ3	AD	0.0481709	0.00951289		0.236202	0.0497192
ENSG00000143420_af	O43768	AD	0.0481964	0.00952436		0.0981397	0.020596
ENSG00000121653_af	Q9UQF2	AD	0.0482919	0.00953582		0.0392944	0.00860745
ENSG00000144455_af	Q53H47	AD	0.0483299	0.00954728		0.108127	0.0228539
ENSG00000170364_af	Q53H47	AD	0.0483299	0.00955874		0.108127	0.0228424
ENSG00000125522_af	P48146	AD	0.0483733	0.0095702		0.21137	0.0450659
ENSG00000203668_af	P26374	AD	0.0484706	0.00958166		0.288273	0.0608367
ENSG00000054277_af	P26374	AD	0.0484706	0.00959312		0.288275	0.0608481
ENSG00000113643_af	P54136	AD	0.0485093	0.00960458		0.161313	0.0345444
ENSG00000104969_af	O43765	AD	0.0486245	0.00961605		0.789374	0.161203
ENSG00000176678_af	Q12952	AD	0.0486376	0.00962751		0.0618089	0.0133639
ENSG00000165810_af	Q6UXG8	AD	0.0486495	0.00963897		0.0082424	0.00176504
ENSG00000213366_af	P28161	AD	0.0486556	0.00965043		0.025634	0.00575358
ENSG00000105219_af	Q9H8S5	AD	0.0486981	0.00966189		0.134506	0.0285501
ENSG00000141497_af	Q9H091	AD	0.0487404	0.00967335		0.0825028	0.0176046
ENSG00000087074_af	O75807	AD	0.0487915	0.00968481		0.105888	0.0224069
ENSG00000089916_af	Q9NWQ4	AD	0.0488438	0.00969628		0.301042	0.0633582
ENSG00000162817_af	Q9H7X2	AD	0.0489451	0.00970774		0.0449253	0.00982235
ENSG00000108826_af	Q9P0M9	AD	0.0489531	0.0097192		0.0290969	0.00651003
ENSG00000023318_af	Q9BS26	AD	0.0491578	0.00973066		0.0278824	0.00629226
ENSG00000138434_af	P28290	AD	0.049191	0.00974212		0.148964	0.0317249
ENSG00000130312_af	Q96I13	AD	0.049205	0.00975358		0.117098	0.0247335
ENSG00000127220_af	Q96I13	AD	0.049205	0.00976504		0.117097	0.0247221
ENSG00000134697_af	Q13823	AD	0.0494523	0.0097765		0.279928	0.0590602
ENSG00000186160_af	Q86W10	AD	0.0495778	0.00978797		0.261517	0.0551862
ENSG00000176490_af	O95057	AD	0.0495783	0.00979943		0.0671159	0.0144642
ENSG00000102755_af	P17948	AD	0.0495845	0.00981089		0.0651921	0.0139828
ENSG00000152207_af	Q9NS75	AD	0.0496371	0.00982235		0.114294	0.0239656
ENSG00000115963_af	P61587	AD	0.0497355	0.00983381		0.134876	0.0286304
ENSG00000120279_af	Q8N699	AD	0.0497574	0.00984527		0.111611	0.0234155
ENSG00000073969_af	P46459	AD	0.0499518	0.00985673		0.040074	0.00876791
ENSG00000231924_af	P11464	AD	0.0499914	0.00986819		0.189896	0.0401834
ENSG00000163472_af	Q9BSE2	AD	0.0500583	0.00987966		0.0872403	0.0186132
ENSG00000180043_af	Q8N5Q1	AD	0.0500847	0.00989112		0.321918	0.0676103
ENSG00000257621_af	P25788	AD	0.0500995	0.00990258		0.0620586	0.0134441
ENSG00000255181_af	P0CW27	AD	0.0501427	0.00991404		0.219044	0.0464183
ENSG00000149124_af	Q6IB77	AD	0.0501528	0.0099255		0.364583	0.0762751
ENSG00000138621_af	Q96CD2	AD	0.0501741	0.00993696		0.0354053	0.00782808
ENSG00000141076_af	Q969X6	AD	0.0502039	0.00994842		0.0976753	0.0205158
ENSG00000134690_af	Q53HL2	AD	0.0502454	0.00995989		0.0514014	0.0114728
ENSG00000178927_af	Q9BQA9	AD	0.0502646	0.00997135		0.0187997	0.00409169
ENSG00000161973_af	Q96M95	AD	0.0504127	0.00998281		0.160335	0.0343954
ENSG00000176753_af	Q8N910	AD	0.0504655	0.00999427		0.513156	0.106384
ENSG00000186603_af	Q96IR7	AD	0.0504855	0.0100057		0.134019	0.0284699
ENSG00000070190_af	Q9UN19	AD	0.0504938	0.0100172		0.357426	0.0750258
ENSG00000249115_af	O94927	AD	0.0505429	0.0100287		0.210728	0.0448252
ENSG00000241360_af	Q96GD0	AD	0.0506119	0.0100401		0.343677	0.0721261
ENSG00000170439_af	Q6UX53	AD	0.0506708	0.0100516		0.180997	0.0385788
ENSG00000168066_af	Q15637	AD	0.0506782	0.010063		0.0115953	0.00251003
ENSG00000180190_af	Q86YL5	AD	0.0509039	0.0100745		0.0529014	0.0116791
ENSG00000168038_af	Q96C45	AD	0.0509929	0.010086		0.0122699	0.00269341
ENSG00000128609_af	Q16718	AD	0.051021	0.0100974		0.0376606	0.00837822
ENSG00000151418_af	Q96LB4	AD	0.0510401	0.0101089		0.0581493	0.0126877
ENSG00000186496_af	Q96N95	AD	0.0510409	0.0101203		0.0685814	0.014808
ENSG00000010072_af	Q9H040	AD	0.051069	0.0101318		0.124634	0.0263496
ENSG00000130368_af	P04201	AD	0.0511063	0.0101433		0.0226553	0.00511175
ENSG00000268797_af	P11509	AD	0.0512248	0.0101547		0.0252739	0.00567335
ENSG00000255974_af	P11509	AD	0.0512248	0.0101662		0.0252747	0.00568481
ENSG00000106443_af	O94880	AD	0.051245	0.0101777		0.359556	0.0754384
ENSG00000155530_af	Q96M69	AD	0.0512494	0.0101891		0.54198	0.112046
ENSG00000185813_af	Q99447	AD	0.0512738	0.0102006		0.0204258	0.0045043
ENSG00000164050_af	O43157	AD	0.0512817	0.010212		0.0415599	0.00910029
ENSG00000272367_af	P20936	AD	0.0513036	0.0102235		0.285064	0.0601834
ENSG00000082515_af	Q9NWU5	AD	0.0513401	0.010235		0.0131916	0.00288825
ENSG00000197226_af	Q66K14	AD	0.0513616	0.0102464		0.0252332	0.00566189
ENSG00000187147_af	Q5VTB9	AD	0.0513748	0.0102579		0.00510128	0.00120344
ENSG00000116996_af	Q12836	AD	0.0514235	0.0102693		0.00985929	0.0020745
ENSG00000237250_af	Q12836	AD	0.0514235	0.0102808		0.00985929	0.00206304
ENSG00000141429_af	Q10472	AD	0.0515255	0.0102923		0.0609537	0.0132149
ENSG00000003137_af	Q9NR63	AD	0.0516186	0.0103037		0.110479	0.0231977
ENSG00000164944_af	Q69YN4	AD	0.0516617	0.0103152		0.245831	0.0517135
ENSG00000243156_af	Q7RTP6	AD	0.051679	0.0103266		0.216031	0.0458797
ENSG00000135482_af	Q96K80	AD	0.0516975	0.0103381		0.0159263	0.00347278
ENSG00000258317_af	Q96K80	AD	0.0516975	0.0103496		0.0159263	0.00346132
ENSG00000185475_af	Q7Z7N9	AD	0.0517266	0.010361		0.0810944	0.0172951
ENSG00000118523_af	P29279	AD	0.0518415	0.0103725		0.0935593	0.0197479
ENSG00000124006_af	O75147	AD	0.0518607	0.010384		0.21598	0.0458682
ENSG00000142082_af	Q9NTG7	AD	0.0519401	0.0103954		0.253538	0.0535931
ENSG00000232629_af	P05538	AD	0.0520166	0.0104069		0.0272826	0.00614327
ENSG00000184702_af	P13224	AD	0.0520618	0.0104183		0.0742218	0.0159885
ENSG00000203618_af	P13224	AD	0.0520618	0.0104298		0.0742218	0.016
ENSG00000240303_af	Q709F0	AD	0.0520646	0.0104413		0.11163	0.0234269
ENSG00000088682_af	O75208	AD	0.0521384	0.0104527		0.00258529	0.00060745
ENSG00000131771_af	Q9UD71	AD	0.0521422	0.0104642		0.5462	0.112871
ENSG00000165566_af	Q8N7J2	AD	0.0523049	0.0104756		0.333216	0.0698911
ENSG00000114124_af	Q8WTQ7	AD	0.0523141	0.0104871		0.0954361	0.0200458
ENSG00000163285_af	Q8N1C3	AD	0.0524909	0.0104986		0.0686367	0.0148195
ENSG00000074800_af	P06733	AD	0.0525034	0.01051		0.0725244	0.0156676
ENSG00000172139_af	Q4G0N8	AD	0.0525113	0.0105215		0.0259009	0.00585673
ENSG00000125733_af	Q15642	AD	0.0525953	0.010533		0.637641	0.130819
ENSG00000161010_af	Q6NTE8	AD	0.0526189	0.0105444		0.0744918	0.0160802
ENSG00000169429_af	P10145	AD	0.0527965	0.0105559		0.215624	0.045788
ENSG00000172421_af	Q8N7B9	AD	0.0528642	0.0105673		0.901469	0.182556
ENSG00000047578_af	O60303	AD	0.0528893	0.0105788		0.0185198	0.00401146
ENSG00000166573_af	P47211	AD	0.0529491	0.0105903		0.042345	0.00926074
ENSG00000241158_af	Q9P2N4	AD	0.0529903	0.0106017		0.153938	0.032894
ENSG00000138640_af	O94988	AD	0.0530208	0.0106132		0.203392	0.0431519
ENSG00000197121_af	Q75T13	AD	0.0530668	0.0106246		0.282479	0.0596103
ENSG00000250751_af	Q9C073	AD	0.0531213	0.0106361		0.0719211	0.0155301
ENSG00000170175_af	P11230	AD	0.0531261	0.0106476		0.428315	0.0893868
ENSG00000164897_af	Q9BVT8	AD	0.0532191	0.010659		0.0358695	0.00795415
ENSG00000109814_af	O60701	AD	0.0536327	0.0106705		0.0162077	0.00356447
ENSG00000189339_af	P0CK96	AD	0.0536726	0.0106819		0.0255903	0.00574212
ENSG00000164746_af	Q8NEG2	AD	0.0536932	0.0106934		0.24842	0.0523324
ENSG00000183688_af	Q8N5W9	AD	0.0537042	0.0107049		0.265168	0.0560344
ENSG00000213588_af	Q96C00	AD	0.0540149	0.0107163		0.0586148	0.0128023
ENSG00000067369_af	Q12888	AD	0.054043	0.0107278		0.112958	0.0236791
ENSG00000158417_af	O60841	AD	0.0542216	0.0107393		0.0201859	0.00442407
ENSG00000100867_af	Q13268	AD	0.05428	0.0107507		0.0256731	0.0057765
ENSG00000181444_af	Q7Z7K2	AD	0.0543121	0.0107622		0.217301	0.0461318
ENSG00000104883_af	Q96HA9	AD	0.0543293	0.0107736		0.254605	0.0538567
ENSG00000165629_af	P36542	AD	0.0544029	0.0107851		0.113692	0.0238052
ENSG00000129270_af	Q8WW18	AD	0.0544249	0.0107966		0.0498713	0.0110602
ENSG00000154768_af	Q8WW18	AD	0.054425	0.010808		0.0498708	0.0110487
ENSG00000111729_af	Q9UMR7	AD	0.0545269	0.0108195		0.21347	0.0453983
ENSG00000170577_af	Q9NPC8	AD	0.0545817	0.0108309		0.0418742	0.00912321
ENSG00000058600_af	Q9NVU0	AD	0.054592	0.0108424		0.0032926	0.000733524
ENSG00000149781_af	Q86UX7	AD	0.0546222	0.0108539		0.865191	0.174946
ENSG00000197813_af	P11049	AD	0.054704	0.0108653		0.0720608	0.015553
ENSG00000170099_af	P08185	AD	0.0547417	0.0108768		0.104099	0.0218682
ENSG00000143799_af	P09874	AD	0.054802	0.0108883		0.099376	0.0208596
ENSG00000120742_af	Q9BY44	AD	0.0548184	0.0108997		0.0548338	0.0120688
ENSG00000144895_af	Q9BY44	AD	0.0548184	0.0109112		0.0548343	0.0120802
ENSG00000113384_af	Q9H4A6	AD	0.0548257	0.0109226		0.050257	0.0111633
ENSG00000080166_af	P40126	AD	0.0548706	0.0109341		0.268711	0.0567221
ENSG00000159720_af	P61421	AD	0.054873	0.0109456		0.236494	0.0497765
ENSG00000091039_af	Q9BZF1	AD	0.0548755	0.010957		0.0592777	0.0129054
ENSG00000140459_af	P05108	AD	0.0549046	0.0109685		0.0273756	0.00616619
ENSG00000112237_af	P24863	AD	0.0550006	0.0109799		0.0287894	0.00645272
ENSG00000172164_af	Q13884	AD	0.055009	0.0109914		0.0465454	0.0101891
ENSG00000233138_af	P31629	AD	0.0550344	0.0110029		0.56459	0.116699
ENSG00000062194_af	Q86WP2	AD	0.0551133	0.0110143		0.566078	0.116928
ENSG00000115317_af	O43464	AD	0.0551269	0.0110258		0.0425128	0.00929513
ENSG00000188931_af	Q5VTH2	AD	0.0552484	0.0110372		0.165841	0.0353811
ENSG00000213465_af	P36404	AD	0.0553171	0.0110487		0.480913	0.099851
ENSG00000145919_af	Q96IK1	AD	0.0553405	0.0110602		0.60365	0.123977
ENSG00000182634_af	Q8NGN6	AD	0.0553762	0.0110716		0.882585	0.178739
ENSG00000204442_af	B1AL88	AD	0.0554031	0.0110831		0.0352138	0.00778223
ENSG00000119333_af	Q96EX3	AD	0.0554197	0.0110946		0.00814756	0.00174212
ENSG00000117266_af	Q07002	AD	0.0554945	0.011106		0.0271676	0.00612034
ENSG00000251450_af	O14827	AD	0.0555121	0.0111175		0.119674	0.0253639
ENSG00000186452_af	Q86WS5	AD	0.0555517	0.0111289		0.00633901	0.00144413
ENSG00000160293_af	P52735	AD	0.0555633	0.0111404		0.258581	0.0545788
ENSG00000108506_af	Q9H0H0	AD	0.0555868	0.0111519		0.204152	0.0434269
ENSG00000129946_af	P98077	AD	0.0555963	0.0111633		0.0733529	0.0158854
ENSG00000133059_af	Q6XUX3	AD	0.0556071	0.0111748		0.217918	0.0462006
ENSG00000158286_af	Q6ZRF8	AD	0.0556202	0.0111862		0.187864	0.0398166
ENSG00000111412_af	Q9H741	AD	0.0556267	0.0111977		0.0075731	0.00166189
ENSG00000160223_af	O75144	AD	0.0557101	0.0112092		0.0499436	0.0110831
ENSG00000102878_af	Q9ULV5	AD	0.0557485	0.0112206		0.406067	0.084596
ENSG00000188611_af	Q9NR71	AD	0.0557808	0.0112321		0.141712	0.0302464
ENSG00000159352_af	P55036	AD	0.0558458	0.0112436		0.0207227	0.00458453
ENSG00000108262_af	Q9Y2X7	AD	0.0558883	0.011255		0.00224176	0.000527221
ENSG00000167645_af	Q5BJH7	AD	0.0559105	0.0112665		0.0605209	0.0131347
ENSG00000154723_af	P18859	AD	0.0559733	0.0112779		0.0895903	0.019106
ENSG00000083937_af	Q9UQN3	AD	0.056031	0.0112894		0.062903	0.0135931
ENSG00000135480_af	P08729	AD	0.0560956	0.0113009		0.0136939	0.00302579
ENSG00000174808_af	P35070	AD	0.0561283	0.0113123		0.0396661	0.00868768
ENSG00000006468_af	P50549	AD	0.0561412	0.0113238		0.137589	0.0293868
ENSG00000125863_af	Q9NPJ1	AD	0.0562221	0.0113352		0.0308043	0.00681948
ENSG00000077498_af	P14679	AD	0.0562623	0.0113467		0.293362	0.0617994
ENSG00000130725_af	P61081	AD	0.0563533	0.0113582		0.405796	0.0845158
ENSG00000126698_af	O75937	AD	0.0563845	0.0113696		0.293971	0.0618911
ENSG00000006074_af	P55774	AD	0.0563994	0.0113811		0.0640488	0.0138109
ENSG00000188315_af	Q6ZUJ4	AD	0.0564905	0.0113926		0.00518681	0.00123782
ENSG00000158805_af	Q8N554	AD	0.0565266	0.011404		0.196747	0.041788
ENSG00000113141_af	Q13123	AD	0.0565285	0.0114155		0.516276	0.106946
ENSG00000119917_af	O14879	AD	0.0565949	0.0114269		0.0282931	0.00634957
ENSG00000169393_af	Q96BH3	AD	0.056685	0.0114384		0.106788	0.0226132
ENSG00000197641_af	Q9UIV8	AD	0.0567204	0.0114499		0.0437528	0.00960458
ENSG00000188779_af	P84550	AD	0.0567387	0.0114613		0.118385	0.0250315
ENSG00000159788_af	O14924	AD	0.056761	0.0114728		0.0968614	0.0203324
ENSG00000204385_af	Q53GD3	AD	0.0568323	0.0114842		0.105482	0.0223037
ENSG00000132669_af	Q8WYP3	AD	0.0568399	0.0114957		0.128841	0.0272779
ENSG00000182585_af	Q6UW88	AD	0.0568594	0.0115072		0.234747	0.0495129
ENSG00000162344_af	O95750	AD	0.0568601	0.0115186		0.00813291	0.00173066
ENSG00000117090_af	Q13291	AD	0.0568673	0.0115301		0.170978	0.036298
ENSG00000122679_af	O60896	AD	0.0568963	0.0115415		0.0193775	0.00421777
ENSG00000138835_af	P49796	AD	0.0569098	0.011553		0.0917777	0.0194269
ENSG00000198792_af	Q9Y519	AD	0.0570246	0.0115645		0.191292	0.0405387
ENSG00000180251_af	Q6AI14	AD	0.0570353	0.0115759		0.250641	0.0528252
ENSG00000162496_af	O75911	AD	0.0570914	0.0115874		0.142034	0.0303037
ENSG00000121742_af	O95452	AD	0.0571944	0.0115989		0.126512	0.0267622
ENSG00000148343_af	Q7L4E1	AD	0.0572066	0.0116103		0.0809807	0.0172837
ENSG00000196793_af	Q16600	AD	0.0572467	0.0116218		0.13259	0.0281146
ENSG00000115159_af	P43304	AD	0.0573064	0.0116332		0.0181544	0.00389685
ENSG00000101342_af	A0PJX2	AD	0.0574385	0.0116447		0.643711	0.132
ENSG00000188483_af	Q5T953	AD	0.0574851	0.0116562		0.164354	0.0350487
ENSG00000204055_af	Q5T953	AD	0.0574851	0.0116676		0.164355	0.0350602
ENSG00000248636_af	Q8IWA6	AD	0.0575614	0.0116791		0.0692258	0.0149914
ENSG00000196391_af	Q6NX45	AD	0.057805	0.0116905		0.0755683	0.0162751
ENSG00000105778_af	Q8NBF6	AD	0.0578169	0.011702		0.0840916	0.0179828
ENSG00000100814_af	Q9NPC3	AD	0.0578407	0.0117135		0.0859028	0.0183725
ENSG00000196460_af	Q6ZV50	AD	0.0578417	0.0117249		0.297245	0.0625559
ENSG00000183273_af	Q8IWA6	AD	0.0579232	0.0117364		0.0702519	0.0152206
ENSG00000117598_af	Q32ZL2	AD	0.0582293	0.0117479		0.283077	0.0597708
ENSG00000099957_af	O15547	AD	0.0582588	0.0117593		0.0829115	0.017765
ENSG00000111911_af	Q9NQE9	AD	0.058283	0.0117708		0.114629	0.0241261
ENSG00000011028_af	Q9UBG0	AD	0.0582843	0.0117822		0.0466204	0.0102006
ENSG00000099834_af	Q9HBB8	AD	0.058366	0.0117937		0.365819	0.0765845
ENSG00000156471_af	P48651	AD	0.05842	0.0118052		0.0509024	0.0113123
ENSG00000131944_af	Q9BTP7	AD	0.0586031	0.0118166		0.0663564	0.0143037
ENSG00000164303_af	Q6UWR7	AD	0.0586251	0.0118281		0.679426	0.139152
ENSG00000213965_af	A8MXV4	AD	0.0588297	0.0118395		0.0983809	0.0206762
ENSG00000102981_af	Q9NPB6	AD	0.058843	0.011851		0.0597347	0.0129971
ENSG00000171987_af	Q8WZ69	AD	0.0588636	0.0118625		0.758206	0.154693
ENSG00000187908_af	Q9UGM3	AD	0.0588822	0.0118739		0.614613	0.126384
ENSG00000105479_af	Q96M63	AD	0.0590065	0.0118854		0.250917	0.0529054
ENSG00000259343_af	Q7Z5M5	AD	0.0590646	0.0118968		0.185358	0.0393352
ENSG00000187987_af	Q3MJ62	AD	0.0590679	0.0119083		0.00170583	0.000378223
ENSG00000136603_af	P12757	AD	0.0592428	0.0119198		0.0858156	0.0183152
ENSG00000133318_af	O95197	AD	0.0592434	0.0119312		0.0563435	0.012298
ENSG00000205765_af	A6NDU8	AD	0.0593454	0.0119427		0.125923	0.0266132
ENSG00000196584_af	O43543	AD	0.0594817	0.0119542		0.0723637	0.0156103
ENSG00000141519_af	Q4G0X9	AD	0.0594981	0.0119656		0.00629107	0.0014212
ENSG00000161040_af	Q8NEE6	AD	0.0595435	0.0119771		0.0538561	0.0118968
ENSG00000196409_af	Q5TYW1	AD	0.0595514	0.0119885		0.2913	0.0614556
ENSG00000118960_af	Q53T59	AD	0.0595742	0.012		0.115127	0.0242521
ENSG00000230798_af	Q9UJU5	AD	0.0595754	0.0120115		0.183215	0.0389226
ENSG00000187140_af	Q9UJU5	AD	0.0595754	0.0120229		0.183215	0.0389341
ENSG00000167695_af	Q8TBR7	AD	0.0596218	0.0120344		0.271991	0.0572378
ENSG00000137714_af	P10109	AD	0.0597954	0.0120458		0.0803879	0.0171576
ENSG00000166091_af	Q96DZ9	AD	0.0598335	0.0120573		0.463956	0.0966418
ENSG00000164379_af	Q9C009	AD	0.0598732	0.0120688		0.00860218	0.00186819
ENSG00000125386_af	P78312	AD	0.0601178	0.0120802		0.0618476	0.0133983
ENSG00000206026_af	Q3B7S5	AD	0.06023	0.0120917		0.0772725	0.0165501
ENSG00000123485_af	Q8NCD3	AD	0.0603153	0.0121032		0.0140577	0.00309456
ENSG00000132664_af	Q9H1D9	AD	0.060381	0.0121146		0.0855101	0.0182808
ENSG00000137571_af	Q9H2Y9	AD	0.0604264	0.0121261		0.0437001	0.0095702
ENSG00000129437_af	Q9P0G3	AD	0.0604526	0.0121375		0.105931	0.0224183
ENSG00000184164_af	Q6UXH1	AD	0.060659	0.012149		0.607874	0.125066
ENSG00000005513_af	P57073	AD	0.060714	0.0121605		0.100843	0.0212837
ENSG00000151292_af	Q9Y6M4	AD	0.0607166	0.0121719		0.0267072	0.00601719
ENSG00000219073_af	P08861	AD	0.0608077	0.0121834		0.0370009	0.00827507
ENSG00000255206_af	Q70Z35	AD	0.0608932	0.0121948		0.0168758	0.00366762
ENSG00000184293_af	Q8IZS7	AD	0.060909	0.0122063		0.260773	0.0550602
ENSG00000104611_af	Q9H788	AD	0.060973	0.0122178		0.472866	0.0984413
ENSG00000123908_af	Q9UKV8	AD	0.06107	0.0122292		0.046665	0.010235
ENSG00000138398_af	Q13427	AD	0.0611313	0.0122407		0.476521	0.0991633
ENSG00000121879_af	P42336	AD	0.0614586	0.0122521		0.0489783	0.0108195
ENSG00000181019_af	P15559	AD	0.0614996	0.0122636		0.705907	0.144367
ENSG00000149499_af	Q32P44	AD	0.0615467	0.0122751		0.0256628	0.00576504
ENSG00000172817_af	O75881	AD	0.0615781	0.0122865		0.739811	0.151209
ENSG00000224970_af	Q9H1D0	AD	0.0616091	0.012298		0.743353	0.15184
ENSG00000165125_af	Q9H1D0	AD	0.0617283	0.0123095		0.634657	0.130212
ENSG00000095752_af	P20809	AD	0.061772	0.0123209		0.072441	0.0156447
ENSG00000116729_af	Q5T9L3	AD	0.0618203	0.0123324		0.148243	0.031553
ENSG00000141252_af	Q5VIR6	AD	0.0618508	0.0123438		0.167509	0.0357249
ENSG00000116544_af	O95886	AD	0.0618962	0.0123553		0.102308	0.0215244
ENSG00000148660_af	Q13555	AD	0.0619432	0.0123668		0.275303	0.0578797
ENSG00000110713_af	P52948	AD	0.0619886	0.0123782		0.0671643	0.0144871
ENSG00000111537_af	P01579	AD	0.0620051	0.0123897		0.082562	0.017639
ENSG00000140682_af	O43294	AD	0.0620091	0.0124011		0.446659	0.0930086
ENSG00000111602_af	Q9UNS1	AD	0.0620596	0.0124126		0.117535	0.0248481
ENSG00000224675_af	Q8IUC8	AD	0.0620817	0.0124241		0.0780197	0.0167221
ENSG00000122378_af	Q9BRX8	AD	0.0621029	0.0124355		0.0491125	0.0108768
ENSG00000115806_af	Q9H8Y8	AD	0.0621891	0.012447		0.07591	0.0163324
ENSG00000079931_af	Q6UVY6	AD	0.062202	0.0124585		0.357986	0.075106
ENSG00000130254_af	Q14151	AD	0.062232	0.0124699		0.270245	0.0569857
ENSG00000137486_af	P49407	AD	0.0622592	0.0124814		0.304913	0.0642636
ENSG00000066185_af	Q9H0C1	AD	0.062358	0.0124928		0.887901	0.179759
ENSG00000160447_af	Q6P5Z2	AD	0.0623677	0.0125043		0.14792	0.0314957
ENSG00000137691_af	Q9BRQ4	AD	0.0624072	0.0125158		0.039691	0.00869914
ENSG00000149043_af	Q8NBV8	AD	0.062411	0.0125272		0.273896	0.0576275
ENSG00000141485_af	Q86YT5	AD	0.0624987	0.0125387		0.166354	0.0354728
ENSG00000087460_af	Q5JWF2	AD	0.062569	0.0125501		0.147458	0.0313582
ENSG00000158022_af	Q969Q1	AD	0.0626394	0.0125616		0.00718986	0.00159312
ENSG00000130294_af	Q12756	AD	0.0626661	0.0125731		0.0509331	0.0113467
ENSG00000119013_af	O43676	AD	0.0626751	0.0125845		0.0607803	0.0132034
ENSG00000189184_af	Q9HCL0	AD	0.0627305	0.012596		0.163119	0.0347507
ENSG00000147439_af	Q9NQY0	AD	0.0627826	0.0126074		0.0275044	0.00620057
ENSG00000213512_af	Q8N8V2	AD	0.0629383	0.0126189		0.240366	0.0505215
ENSG00000167114_af	Q6P1M0	AD	0.0630493	0.0126304		0.161465	0.0345673
ENSG00000182934_af	P08240	AD	0.0630682	0.0126418		0.150801	0.0321375
ENSG00000130958_af	Q76EJ3	AD	0.0632548	0.0126533		0.0423785	0.00927221
ENSG00000171819_af	O43827	AD	0.0632944	0.0126648		0.0525252	0.0116447
ENSG00000184394_af	Q8IXE1	AD	0.0634122	0.0126762		0.0388055	0.00855014
ENSG00000168995_af	Q9Y286	AD	0.0634133	0.0126877		0.52503	0.108642
ENSG00000185670_af	Q9H5J0	AD	0.063582	0.0126991		0.622226	0.127668
ENSG00000172320_af	Q8NGJ0	AD	0.0636736	0.0127106		0.0335581	0.00750716
ENSG00000196876_af	Q9UQD0	AD	0.0637053	0.0127221		0.0448696	0.00981089
ENSG00000100997_af	Q8N2K0	AD	0.0638228	0.0127335		0.0522816	0.0115989
ENSG00000186150_af	Q8N7F7	AD	0.0638847	0.012745		0.322571	0.0677364
ENSG00000172985_af	Q8TEJ3	AD	0.0640283	0.0127564		0.2143	0.0455358
ENSG00000130811_af	O75821	AD	0.0640901	0.0127679		0.0687864	0.0148997
ENSG00000160392_af	Q8N9M1	AD	0.064121	0.0127794		0.137427	0.0293524
ENSG00000149257_af	P50454	AD	0.0641531	0.0127908		0.0582923	0.0127106
ENSG00000246366_af	Q53H82	AD	0.0642229	0.0128023		0.0101768	0.00217765
ENSG00000135862_af	P11047	AD	0.0643566	0.0128138		0.122488	0.0258911
ENSG00000084731_af	O14782	AD	0.0644955	0.0128252		0.0696749	0.0150946
ENSG00000159176_af	P21291	AD	0.0645609	0.0128367		0.474016	0.0986819
ENSG00000163661_af	P26022	AD	0.0646334	0.0128481		0.097983	0.0205731
ENSG00000221855_af	P59536	AD	0.0647818	0.0128596		0.0648979	0.0139255
ENSG00000116525_af	Q9BVG3	AD	0.0647889	0.0128711		0.100043	0.021043
ENSG00000243155_af	Q5VZ46	AD	0.0648006	0.0128825		0.096396	0.0202407
ENSG00000137270_af	Q9NP62	AD	0.0648757	0.012894		0.102941	0.0216619
ENSG00000164306_af	Q96LW4	AD	0.0649192	0.0129054		0.18094	0.0385673
ENSG00000259040_af	Q8NBS9	AD	0.0649971	0.0129169		0.0804411	0.017192
ENSG00000239264_af	Q8NBS9	AD	0.0649971	0.0129284		0.080441	0.0171805
ENSG00000163159_af	Q15906	AD	0.0649998	0.0129398		0.04289	0.00939828
ENSG00000008382_af	Q8N594	AD	0.0650161	0.0129513		0.0663996	0.0143266
ENSG00000130699_af	O00268	AD	0.0650271	0.0129628		0.236506	0.0497994
ENSG00000156510_af	Q2TB90	AD	0.0650274	0.0129742		0.0192852	0.00417192
ENSG00000168685_af	P16871	AD	0.0650436	0.0129857		0.0658555	0.0141777
ENSG00000054967_af	Q969Z4	AD	0.0650673	0.0129971		0.497802	0.103381
ENSG00000103429_af	Q9NZS9	AD	0.0651653	0.0130086		0.209536	0.044596
ENSG00000169641_af	Q86V48	AD	0.0651874	0.0130201		0.0338879	0.00758739
ENSG00000142178_af	P57059	AD	0.0652332	0.0130315		0.0976703	0.0205043
ENSG00000153093_af	Q9NUZ1	AD	0.065308	0.013043		0.188016	0.039851
ENSG00000186868_af	P10636	AD	0.0653564	0.0130544		0.176595	0.0376734
ENSG00000166484_af	Q13164	AD	0.0654041	0.0130659		0.0320538	0.00718625
ENSG00000076662_af	P32942	AD	0.0654058	0.0130774		0.116481	0.0245616
ENSG00000186891_af	Q9Y5U5	AD	0.0654752	0.0130888		0.0235694	0.00534097
ENSG00000163235_af	P01135	AD	0.0655575	0.0131003		0.268626	0.0566991
ENSG00000185652_af	P20783	AD	0.0655994	0.0131117		0.0975799	0.0204699
ENSG00000198610_af	P17516	AD	0.0656209	0.0131232		0.252921	0.0534327
ENSG00000135047_af	P07711	AD	0.0656666	0.0131347		0.00482225	0.00112321
ENSG00000126247_af	P04632	AD	0.06569	0.0131461		0.0942608	0.0199083
ENSG00000156735_af	O95429	AD	0.0658408	0.0131576		0.15875	0.0340745
ENSG00000180354_af	Q8N3F0	AD	0.065852	0.0131691		0.273747	0.0575931
ENSG00000248385_af	B6A8C7	AD	0.0659886	0.0131805		0.750335	0.153112
ENSG00000085832_af	P42566	AD	0.0660759	0.013192		0.0255441	0.00573066
ENSG00000205231_af	Q6ZVT0	AD	0.0660762	0.0132034		0.0330104	0.00739255
ENSG00000213928_af	Q00978	AD	0.0660845	0.0132149		0.50986	0.105719
ENSG00000248429_af	Q6UWH4	AD	0.0661085	0.0132264		0.117979	0.0249169
ENSG00000213337_af	Q86SG2	AD	0.066144	0.0132378		0.0635927	0.0137421
ENSG00000163126_af	Q86SG2	AD	0.066144	0.0132493		0.0635923	0.0137307
ENSG00000104320_af	O60934	AD	0.0661712	0.0132607		0.0615511	0.0133295
ENSG00000179262_af	P54725	AD	0.0662058	0.0132722		0.0130116	0.00281948
ENSG00000203757_af	Q8NGY3	AD	0.0662091	0.0132837		0.0214479	0.00490544
ENSG00000125657_af	P41273	AD	0.0662927	0.0132951		0.0437663	0.00961605
ENSG00000164125_af	Q6UWH4	AD	0.0662935	0.0133066		0.118858	0.0251117
ENSG00000174827_af	Q5T2W1	AD	0.0663285	0.0133181		0.0457677	0.00999427
ENSG00000149716_af	Q8WV07	AD	0.0663558	0.0133295		0.0776123	0.0166074
ENSG00000213413_af	Q6DKI7	AD	0.0663992	0.013341		0.313235	0.0659484
ENSG00000145692_af	Q93088	AD	0.0665933	0.0133524		0.152271	0.0324699
ENSG00000122176_af	Q06828	AD	0.0665939	0.0133639		0.361938	0.0758625
ENSG00000145388_af	Q9HCE5	AD	0.0666264	0.0133754		0.415918	0.0866017
ENSG00000186306_af	Q8NGX3	AD	0.0667061	0.0133868		0.239135	0.050361
ENSG00000018510_af	O00116	AD	0.0667348	0.0133983		0.283617	0.0598854
ENSG00000143256_af	Q9UHV9	AD	0.0667921	0.0134097		0.247004	0.0519542
ENSG00000144802_af	Q9BYH8	AD	0.0667949	0.0134212		0.0306571	0.00677364
ENSG00000144357_af	Q6ZT12	AD	0.0668126	0.0134327		0.240224	0.0504756
ENSG00000109501_af	O76024	AD	0.0668136	0.0134441		0.394447	0.082086
ENSG00000169398_af	Q05397	AD	0.0669047	0.0134556		0.00139053	0.00034384
ENSG00000198366_af	P68431	AD	0.0669221	0.013467		0.0503994	0.0111748
ENSG00000198783_af	Q96NB3	AD	0.0669292	0.0134785		0.116652	0.0245845
ENSG00000176018_af	Q7Z3D4	AD	0.0669499	0.01349		0.0359496	0.00797708
ENSG00000238227_af	H0YL14	AD	0.0669547	0.0135014		0.0430057	0.00943266
ENSG00000227028_af	P32418	AD	0.0670989	0.0135129		0.181284	0.0386705
ENSG00000183023_af	P32418	AD	0.0671508	0.0135244		0.157151	0.033639
ENSG00000143845_af	Q9NVF9	AD	0.0674047	0.0135358		0.133358	0.0283438
ENSG00000176563_af	Q8N815	AD	0.0674166	0.0135473		0.699655	0.143117
ENSG00000175520_af	Q9H347	AD	0.06751	0.0135587		0.13711	0.0292607
ENSG00000237640_af	Q8NFK1	AD	0.0675619	0.0135702		0.0464584	0.0101662
ENSG00000110367_af	P26196	AD	0.0675648	0.0135817		0.0205332	0.00452722
ENSG00000096395_af	P12872	AD	0.0675775	0.0135931		0.00274715	0.000641834
ENSG00000240093_af	Q8IXL6	AD	0.0677425	0.0136046		0.0128065	0.00277364
ENSG00000132205_af	Q9BXX0	AD	0.0677619	0.013616		0.347688	0.072894
ENSG00000182973_af	Q9H9A5	AD	0.0678993	0.0136275		0.0664797	0.0143496
ENSG00000236782_af	O00488	AD	0.0679838	0.013639		0.0854507	0.0182579
ENSG00000142684_af	O00488	AD	0.0679838	0.0136504		0.0854509	0.0182693
ENSG00000174206_af	Q96MD2	AD	0.0679938	0.0136619		0.0653081	0.0140287
ENSG00000266967_af	Q9BTE6	AD	0.0680322	0.0136734		0.104427	0.0219255
ENSG00000100626_af	Q8N428	AD	0.0680744	0.0136848		0.213296	0.0453524
ENSG00000256339_af	Q93070	AD	0.0682399	0.0136963		0.0252322	0.00565043
ENSG00000272589_af	A7E2V4	AD	0.0682596	0.0137077		0.0484857	0.0106476
ENSG00000164946_af	Q5H8C1	AD	0.0682809	0.0137192		0.228653	0.0484126
ENSG00000145439_af	Q8WX93	AD	0.0683113	0.0137307		0.179156	0.0382579
ENSG00000006071_af	Q09428	AD	0.0683604	0.0137421		0.0436294	0.00954728
ENSG00000161513_af	P22570	AD	0.0683792	0.0137536		0.110842	0.0232894
ENSG00000151651_af	P78325	AD	0.0684727	0.013765		0.330533	0.0693524
ENSG00000162746_af	Q6BAA4	AD	0.0685296	0.0137765		0.0315366	0.00696848
ENSG00000135919_af	P07093	AD	0.0685366	0.013788		0.0831936	0.017788
ENSG00000183784_af	Q5T8R8	AD	0.0686353	0.0137994		0.0889588	0.0189914
ENSG00000139780_af	Q5VZV1	AD	0.0687574	0.0138109		0.0971737	0.0203782
ENSG00000176787_af	Q8NGJ4	AD	0.0687921	0.0138223		0.0227259	0.00513467
ENSG00000054118_af	Q9Y2W1	AD	0.0688536	0.0138338		0.0231831	0.00527221
ENSG00000127720_af	Q8N6Q8	AD	0.0688992	0.0138453		0.213245	0.045341
ENSG00000112531_af	Q96PU8	AD	0.0689458	0.0138567		0.110594	0.0232321
ENSG00000168569_af	Q9Y6J9	AD	0.0690237	0.0138682		0.119725	0.0253868
ENSG00000162227_af	Q9Y6J9	AD	0.0690237	0.0138797		0.119725	0.0253754
ENSG00000137500_af	Q9GZT6	AD	0.069128	0.0138911		0.12351	0.026086
ENSG00000189320_af	Q6UWF9	AD	0.0692065	0.0139026		0.091718	0.019404
ENSG00000178828_af	Q9NXI6	AD	0.0692556	0.013914		0.0146408	0.00325501
ENSG00000235434_af	Q9NXI6	AD	0.0692556	0.0139255		0.0146405	0.00324355
ENSG00000166166_af	Q96FX7	AD	0.0692701	0.013937		0.230679	0.0487794
ENSG00000134258_af	Q7Z7D3	AD	0.0693482	0.0139484		0.29437	0.0619484
ENSG00000130751_af	Q99742	AD	0.06937	0.0139599		0.097437	0.020447
ENSG00000148572_af	Q96F24	AD	0.0694132	0.0139713		0.724493	0.148264
ENSG00000066926_af	P22830	AD	0.0694184	0.0139828		0.0557582	0.0121948
ENSG00000067248_af	Q7Z478	AD	0.069526	0.0139943		0.101632	0.0213983
ENSG00000115970_af	Q6YHU6	AD	0.0695894	0.0140057		0.0758185	0.0163095
ENSG00000183580_af	Q9UJT9	AD	0.0696071	0.0140172		0.147283	0.0313352
ENSG00000137154_af	P62753	AD	0.0696508	0.0140287		0.122126	0.0258453
ENSG00000170627_af	Q8WW33	AD	0.0696576	0.0140401		0.0727544	0.0157364
ENSG00000253875_af	Q86WR0	AD	0.0696666	0.0140516		0.142154	0.0303725
ENSG00000172247_af	Q9BXJ3	AD	0.0697137	0.014063		0.0171001	0.00372493
ENSG00000271793_af	Q9Y5W7	AD	0.0698489	0.0140745		0.226382	0.0478625
ENSG00000152377_af	Q08629	AD	0.0698935	0.014086		0.678745	0.139014
ENSG00000136839_af	Q8NGT0	AD	0.0700275	0.0140974		0.252859	0.0534097
ENSG00000161999_af	Q96S16	AD	0.0700678	0.0141089		0.0447008	0.00976504
ENSG00000130287_af	O14594	AD	0.0701344	0.0141203		0.0526082	0.0116562
ENSG00000176102_af	Q12996	AD	0.0701601	0.0141318		0.15803	0.0339828
ENSG00000166924_af	Q6ZVC0	AD	0.0702017	0.0141433		0.0566009	0.0123553
ENSG00000066455_af	Q8TBA6	AD	0.0702337	0.0141547		0.336035	0.0704871
ENSG00000054179_af	Q9Y5L3	AD	0.070291	0.0141662		0.142818	0.0305215
ENSG00000132305_af	Q16891	AD	0.0703204	0.0141777		0.0140398	0.00308309
ENSG00000104043_af	Q8TF62	AD	0.0704089	0.0141891		0.132614	0.0281261
ENSG00000172878_af	Q6UB28	AD	0.0704218	0.0142006		0.252477	0.0532493
ENSG00000141699_af	Q86VR2	AD	0.070473	0.014212		0.105369	0.0222464
ENSG00000137101_af	P21854	AD	0.0706071	0.0142235		0.617483	0.126831
ENSG00000140650_af	O15305	AD	0.0707428	0.014235		0.157663	0.0339026
ENSG00000203805_af	Q5VZY2	AD	0.0708551	0.0142464		0.129793	0.0274728
ENSG00000116580_af	Q3T8J9	AD	0.0709502	0.0142579		0.242331	0.0510143
ENSG00000115602_af	Q01638	AD	0.0710048	0.0142693		0.0327203	0.00732378
ENSG00000115604_af	Q01638	AD	0.0710048	0.0142808		0.0327201	0.00731232
ENSG00000231999_af	Q6P9F7	AD	0.0711339	0.0142923		0.0335196	0.00748424
ENSG00000161800_af	Q9H0H5	AD	0.0711492	0.0143037		0.138543	0.029616
ENSG00000134278_af	Q08AE8	AD	0.0712011	0.0143152		0.0235196	0.00532951
ENSG00000189376_af	Q96K31	AD	0.0712471	0.0143266		0.0279385	0.00631519
ENSG00000158714_af	Q9P0V8	AD	0.0712548	0.0143381		0.268352	0.0566189
ENSG00000184988_af	Q96A25	AD	0.0712667	0.0143496		0.450762	0.0940516
ENSG00000100271_af	O95922	AD	0.0712881	0.014361		0.149551	0.0318625
ENSG00000160588_af	Q6UWV2	AD	0.0713226	0.0143725		0.0100228	0.00214327
ENSG00000128059_af	Q06203	AD	0.0713281	0.014384		0.0209477	0.00469914
ENSG00000129221_af	Q9NZN9	AD	0.071381	0.0143954		0.184959	0.039255
ENSG00000205795_af	Q717R9	AD	0.0714424	0.0144069		0.126158	0.0266819
ENSG00000135776_af	Q9NRK6	AD	0.071468	0.0144183		0.231292	0.0490086
ENSG00000132405_af	Q9P2M4	AD	0.0715303	0.0144298		0.306042	0.0644241
ENSG00000148482_af	Q504Y0	AD	0.0715472	0.0144413		0.104666	0.0219828
ENSG00000072958_af	Q9BXS5	AD	0.0716376	0.0144527		0.225066	0.0475759
ENSG00000105127_af	O43823	AD	0.0716426	0.0144642		0.0786309	0.0168596
ENSG00000082146_af	O60296	AD	0.0718987	0.0144756		0.260307	0.0549799
ENSG00000128228_af	Q9HCN8	AD	0.0719035	0.0144871		0.0824424	0.0175702
ENSG00000064547_af	Q9HBW0	AD	0.0719432	0.0144986		0.170307	0.036149
ENSG00000165238_af	Q9Y3S1	AD	0.0719535	0.01451		0.0411088	0.00895129
ENSG00000258026_af	Q9H6R3	AD	0.0720592	0.0145215		0.057197	0.0124928
ENSG00000112182_af	Q9BYV9	AD	0.0721541	0.014533		0.4027	0.0838281
ENSG00000100221_af	Q15040	AD	0.0722819	0.0145444		0.263265	0.0556218
ENSG00000168830_af	P28566	AD	0.0723148	0.0145559		0.401408	0.0836218
ENSG00000188157_af	O00468	AD	0.0723634	0.0145673		0.0589316	0.0128596
ENSG00000087502_af	Q96RQ1	AD	0.0724605	0.0145788		0.494331	0.102682
ENSG00000121104_af	Q9C073	AD	0.0725005	0.0145903		0.0959183	0.0201605
ENSG00000167863_af	O75947	AD	0.0725131	0.0146017		0.569593	0.117559
ENSG00000092607_af	Q96SF7	AD	0.0725638	0.0146132		0.00794589	0.00169628
ENSG00000137720_af	Q9H5F2	AD	0.0726529	0.0146246		0.153416	0.032745
ENSG00000198816_af	Q9NW07	AD	0.0727189	0.0146361		0.00685701	0.00154728
ENSG00000072657_af	Q9UKU6	AD	0.0729558	0.0146476		0.076067	0.0163782
ENSG00000101773_af	Q99708	AD	0.0730339	0.014659		0.0233551	0.00529513
ENSG00000136827_af	O14656	AD	0.0731229	0.0146705		0.404491	0.0842521
ENSG00000265818_af	Q8TDH9	AD	0.0732212	0.0146819		0.287036	0.0605501
ENSG00000013375_af	O95394	AD	0.073272	0.0146934		0.0840602	0.0179713
ENSG00000253305_af	Q9Y5F8	AD	0.0732848	0.0147049		0.0306087	0.00676218
ENSG00000253846_af	Q9Y5F8	AD	0.0732848	0.0147163		0.0306087	0.00673926
ENSG00000254122_af	Q9Y5F8	AD	0.0732848	0.0147278		0.0306087	0.00675072
ENSG00000113583_af	Q8NC54	AD	0.0733162	0.0147393		0.461441	0.096149
ENSG00000177688_af	Q6EEV6	AD	0.0733277	0.0147507		0.0491782	0.0108883
ENSG00000119630_af	P49763	AD	0.073444	0.0147622		0.14282	0.030533
ENSG00000134146_af	Q7L8W6	AD	0.0734505	0.0147736		0.074756	0.0161605
ENSG00000131409_af	Q9NT99	AD	0.0734591	0.0147851		0.0617117	0.0133524
ENSG00000172725_af	Q9BR76	AD	0.0735098	0.0147966		0.117572	0.0248596
ENSG00000112655_af	Q13308	AD	0.0735572	0.014808		0.136382	0.0290774
ENSG00000164151_af	Q9Y2F5	AD	0.0736033	0.0148195		0.0433764	0.00951289
ENSG00000104921_af	P06734	AD	0.0736414	0.0148309		0.165485	0.0352665
ENSG00000125148_af	P02795	AD	0.073704	0.0148424		0.00663048	0.00148997
ENSG00000124571_af	Q9HAV4	AD	0.0737545	0.0148539		0.0504829	0.0112092
ENSG00000170456_af	Q6ZUT9	AD	0.0738013	0.0148653		0.00347148	0.000790831
ENSG00000106571_af	P10071	AD	0.0738293	0.0148768		0.0531545	0.0117708
ENSG00000112739_af	Q13523	AD	0.073831	0.0148883		0.189121	0.0400802
ENSG00000000938_af	P09769	AD	0.0738329	0.0148997		0.0164157	0.00357593
ENSG00000132554_af	Q8NE09	AD	0.0738731	0.0149112		0.110695	0.0232665
ENSG00000266962_af	P14061	AD	0.0739699	0.0149226		0.0573159	0.0125272
ENSG00000136943_af	O60911	AD	0.0739762	0.0149341		0.0964574	0.0202521
ENSG00000172199_af	Q8NH10	AD	0.0740961	0.0149456		0.181016	0.0385903
ENSG00000135424_af	Q13683	AD	0.0742384	0.014957		0.0857394	0.0182923
ENSG00000237172_af	Q6UX72	AD	0.0743693	0.0149685		0.381225	0.0795415
ENSG00000167315_af	P42765	AD	0.074399	0.0149799		0.318607	0.0668539
ENSG00000165832_af	Q8WWH5	AD	0.0745683	0.0149914		0.37339	0.0779599
ENSG00000198478_af	Q9UJC5	AD	0.0745764	0.0150029		0.0237639	0.00540974
ENSG00000196872_af	Q6NV74	AD	0.0745796	0.0150143		0.0817031	0.0174097
ENSG00000118007_af	Q8WVM7	AD	0.0747235	0.0150258		0.204479	0.0435072
ENSG00000146352_af	Q5SYC1	AD	0.0747613	0.0150372		0.22404	0.0474269
ENSG00000168734_af	P00813	AD	0.0748109	0.0150487		0.143576	0.0306705
ENSG00000115109_af	Q9HCM4	AD	0.0748143	0.0150602		0.288345	0.0608825
ENSG00000137992_af	P11182	AD	0.0748144	0.0150716		0.177477	0.0378567
ENSG00000187098_af	O75030	AD	0.0749044	0.0150831		0.0815508	0.0173754
ENSG00000100302_af	Q96D21	AD	0.0749099	0.0150946		0.170097	0.0361375
ENSG00000180611_af	Q8IYB1	AD	0.0749945	0.015106		0.265947	0.0561834
ENSG00000112110_af	Q9H0U6	AD	0.0750806	0.0151175		0.119048	0.025192
ENSG00000165801_af	Q8TER5	AD	0.0751079	0.0151289		0.186135	0.0394613
ENSG00000164414_af	P78382	AD	0.0751148	0.0151404		0.183627	0.0389914
ENSG00000113430_af	P78413	AD	0.07527	0.0151519		0.216796	0.0459943
ENSG00000171320_af	Q56NI9	AD	0.0754152	0.0151633		0.0747279	0.0161375
ENSG00000006788_af	Q9UKX3	AD	0.0755012	0.0151748		0.0638053	0.013788
ENSG00000137203_af	P05549	AD	0.0755061	0.0151862		0.322979	0.0678166
ENSG00000122254_af	Q9Y278	AD	0.0755613	0.0151977		0.126903	0.0268883
ENSG00000188428_af	Q8TDH9	AD	0.0756138	0.0152092		0.303884	0.0639542
ENSG00000124201_af	Q9P2E3	AD	0.0756642	0.0152206		0.240366	0.05051
ENSG00000105176_af	O94763	AD	0.0756838	0.0152321		0.0723315	0.0155989
ENSG00000183780_af	Q8IY50	AD	0.075715	0.0152436		0.0601639	0.0130774
ENSG00000213463_af	P57105	AD	0.0757233	0.015255		0.21279	0.0452951
ENSG00000116128_af	O00512	AD	0.0757294	0.0152665		0.168348	0.035851
ENSG00000187492_af	A6H8M9	AD	0.0757481	0.0152779		0.00141663	0.000355301
ENSG00000171310_af	Q9NPF2	AD	0.0758637	0.0152894		0.10066	0.0212264
ENSG00000106479_af	O60290	AD	0.0758794	0.0153009		0.12853	0.0272206
ENSG00000188554_af	Q14596	AD	0.0759388	0.0153123		0.0997558	0.0209971
ENSG00000089597_af	Q14697	AD	0.0759583	0.0153238		0.663812	0.136149
ENSG00000127249_af	Q4VNC1	AD	0.0759892	0.0153352		0.45822	0.095553
ENSG00000204882_af	Q99678	AD	0.0760067	0.0153467		0.0656381	0.0140974
ENSG00000166961_af	Q8N5U1	AD	0.0760455	0.0153582		0.0489517	0.0107966
ENSG00000188624_af	Q6UXB1	AD	0.0760638	0.0153696		0.603977	0.124069
ENSG00000267922_af	Q6UXB1	AD	0.0760638	0.0153811		0.603976	0.124057
ENSG00000204310_af	Q99943	AD	0.0760906	0.0153926		0.0254247	0.0057192
ENSG00000178188_af	Q9NRF2	AD	0.0760942	0.015404		0.00589154	0.00132951
ENSG00000165061_af	Q9H898	AD	0.0762637	0.0154155		0.0268572	0.0060745
ENSG00000140463_af	Q96RK4	AD	0.0763285	0.0154269		0.29749	0.0626017
ENSG00000146376_af	Q8N392	AD	0.0763813	0.0154384		0.281508	0.0593238
ENSG00000197147_af	Q6P9F7	AD	0.0763919	0.0154499		0.0369292	0.00825215
ENSG00000073849_af	P15907	AD	0.0764056	0.0154613		0.227997	0.0482636
ENSG00000159314_af	Q6ZUM4	AD	0.076419	0.0154728		0.282352	0.0595645
ENSG00000196155_af	Q58EX7	AD	0.0764985	0.0154842		0.199276	0.042384
ENSG00000111696_af	Q86UY8	AD	0.0765066	0.0154957		0.510101	0.105742
ENSG00000140876_af	P0C024	AD	0.076579	0.0155072		0.163491	0.0348653
ENSG00000144810_af	P27658	AD	0.0767225	0.0155186		0.15158	0.0322407
ENSG00000105404_af	Q9UI14	AD	0.0767429	0.0155301		0.0651028	0.0139713
ENSG00000172209_af	Q99680	AD	0.0768362	0.0155415		0.157255	0.0337077
ENSG00000170745_af	Q9BQ31	AD	0.0768374	0.015553		0.255931	0.0541318
ENSG00000205327_af	A6NDL8	AD	0.0769763	0.0155645		0.0619616	0.0134097
ENSG00000138175_af	P36405	AD	0.0770322	0.0155759		0.00218774	0.000504298
ENSG00000204344_af	P49842	AD	0.0770535	0.0155874		0.151125	0.0321834
ENSG00000204618_af	Q9H2S5	AD	0.077065	0.0155989		0.379207	0.0791289
ENSG00000164211_af	Q96DR4	AD	0.0770765	0.0156103		0.174169	0.0370659
ENSG00000118197_af	Q5T1V6	AD	0.0770895	0.0156218		0.259815	0.0548883
ENSG00000111231_af	Q9UHW5	AD	0.0771816	0.0156332		0.0543583	0.0119885
ENSG00000105655_af	Q9NPH2	AD	0.0774435	0.0156447		0.298684	0.0627966
ENSG00000196660_af	Q6XR72	AD	0.0774567	0.0156562		0.157596	0.0338797
ENSG00000114166_af	Q92831	AD	0.0774678	0.0156676		0.105225	0.0221662
ENSG00000145703_af	Q13576	AD	0.077474	0.0156791		0.295447	0.0621433
ENSG00000101052_af	Q9Y366	AD	0.0775055	0.0156905		0.228593	0.0483897
ENSG00000165935_af	A6NFE2	AD	0.0775691	0.015702		0.352517	0.0740057
ENSG00000147465_af	P49675	AD	0.0776428	0.0157135		0.177187	0.037765
ENSG00000102900_af	Q8N1F7	AD	0.0776533	0.0157249		0.172047	0.0366418
ENSG00000108061_af	Q9UQ13	AD	0.0776652	0.0157364		0.228433	0.0483668
ENSG00000125246_af	Q8N0X4	AD	0.077842	0.0157479		0.726183	0.148562
ENSG00000232754_af	Q09472	AD	0.0779637	0.0157593		0.0358769	0.00796562
ENSG00000072041_af	Q9H2J7	AD	0.0783609	0.0157708		0.283706	0.0599083
ENSG00000154016_af	Q13588	AD	0.0783633	0.0157822		0.188496	0.0399427
ENSG00000168438_af	O60508	AD	0.0783834	0.0157937		0.332114	0.0696848
ENSG00000187753_af	Q5TBE3	AD	0.0784168	0.0158052		0.665959	0.136607
ENSG00000160446_af	Q96GR4	AD	0.078466	0.0158166		0.0193514	0.0042063
ENSG00000215277_af	A8MTL3	AD	0.078591	0.0158281		0.0734042	0.0159083
ENSG00000215271_af	Q8IX15	AD	0.0786044	0.0158395		0.241532	0.0507736
ENSG00000118972_af	Q9GZV9	AD	0.0786384	0.015851		0.0688907	0.0149226
ENSG00000223501_af	Q8N1B4	AD	0.0786454	0.0158625		0.116367	0.0245043
ENSG00000171617_af	O14682	AD	0.0787967	0.0158739		0.05054	0.011255
ENSG00000154764_af	O00755	AD	0.0788105	0.0158854		0.431987	0.0900287
ENSG00000187800_af	Q5VY43	AD	0.0788241	0.0158968		0.0345748	0.00770201
ENSG00000008294_af	O60271	AD	0.0788328	0.0159083		0.312048	0.0657077
ENSG00000176715_af	Q4G176	AD	0.0788413	0.0159198		0.0571608	0.0124699
ENSG00000162129_af	Q9H078	AD	0.0788874	0.0159312		0.116797	0.0246304
ENSG00000162384_af	Q9NWV4	AD	0.078978	0.0159427		0.0283141	0.00636103
ENSG00000179715_af	Q96HM7	AD	0.0789929	0.0159542		0.0929607	0.0196447
ENSG00000170502_af	Q9BW91	AD	0.0789933	0.0159656		0.555226	0.114808
ENSG00000117360_af	O43395	AD	0.0791619	0.0159771		0.281856	0.0594384
ENSG00000177272_af	P22001	AD	0.0791825	0.0159885		0.0153577	0.00338109
ENSG00000172382_af	Q9BQR3	AD	0.0792618	0.016		0.254898	0.0539026
ENSG00000152642_af	Q8N335	AD	0.0793303	0.0160115		0.0536813	0.0118739
ENSG00000124191_af	Q96NM4	AD	0.0793389	0.0160229		0.0458868	0.0100516
ENSG00000165379_af	Q96NI6	AD	0.0794176	0.0160344		0.185035	0.0392779
ENSG00000036054_af	Q9NUY8	AD	0.07943	0.0160458		0.201792	0.0428653
ENSG00000117215_af	Q9UNK4	AD	0.0794379	0.0160573		0.19059	0.0403782
ENSG00000168314_af	Q13875	AD	0.0795295	0.0160688		0.421194	0.0878166
ENSG00000137766_af	Q8NB66	AD	0.0795782	0.0160802		0.202906	0.0430258
ENSG00000120907_af	P35348	AD	0.0796229	0.0160917		0.0556107	0.0121605
ENSG00000171604_af	Q7LFL8	AD	0.0796298	0.0161032		0.269892	0.0569169
ENSG00000231993_af	Q09472	AD	0.0796331	0.0161146		0.0377515	0.00844699
ENSG00000154240_af	Q8N8E3	AD	0.0796651	0.0161261		0.538901	0.111473
ENSG00000093144_af	Q9NTX5	AD	0.0797723	0.0161375		0.245838	0.0517249
ENSG00000116285_af	Q9UJM3	AD	0.0798749	0.016149		0.36754	0.0769398
ENSG00000081041_af	P19875	AD	0.0799583	0.0161605		0.237451	0.0500057
ENSG00000145721_af	Q8N485	AD	0.0800308	0.0161719		0.0599669	0.0130315
ENSG00000167850_af	Q08708	AD	0.0800434	0.0161834		0.124996	0.0264642
ENSG00000139354_af	Q86XJ1	AD	0.080072	0.0161948		0.200011	0.04251
ENSG00000174611_af	Q8NBH2	AD	0.0801053	0.0162063		0.00216358	0.000492837
ENSG00000072135_af	Q99952	AD	0.080129	0.0162178		0.0788878	0.0169054
ENSG00000171790_af	Q499Z3	AD	0.080293	0.0162292		0.34682	0.0727106
ENSG00000189180_af	Q06730	AD	0.0803181	0.0162407		0.0410498	0.00892837
ENSG00000175170_af	Q5T319	AD	0.080391	0.0162521		0.147103	0.0312665
ENSG00000161326_af	O95147	AD	0.0804091	0.0162636		0.0630401	0.013616
ENSG00000164175_af	Q9UMX9	AD	0.0804298	0.0162751		0.0327146	0.00730086
ENSG00000165828_af	Q96NZ9	AD	0.0804339	0.0162865		0.710877	0.145341
ENSG00000132703_af	P02743	AD	0.0804649	0.016298		0.0426232	0.00935244
ENSG00000112339_af	Q9Y450	AD	0.0804921	0.0163095		0.169701	0.0360458
ENSG00000133195_af	Q8N1S5	AD	0.0805398	0.0163209		0.428936	0.089467
ENSG00000236545_af	P57071	AD	0.08059	0.0163324		0.167221	0.0356791
ENSG00000226455_af	Q9BYV9	AD	0.0806392	0.0163438		0.700268	0.143221
ENSG00000162512_af	O75056	AD	0.080651	0.0163553		0.0768052	0.0164928
ENSG00000155034_af	Q96ME1	AD	0.0806685	0.0163668		0.117971	0.0249054
ENSG00000143653_af	Q8NBX0	AD	0.0807323	0.0163782		0.496136	0.103083
ENSG00000173473_af	Q92922	AD	0.0807451	0.0163897		0.292304	0.061639
ENSG00000163481_af	Q96BH1	AD	0.0808262	0.0164011		0.470329	0.0979255
ENSG00000137807_af	Q02241	AD	0.0808994	0.0164126		0.32247	0.0677135
ENSG00000069011_af	P78337	AD	0.0809269	0.0164241		0.437683	0.0910487
ENSG00000134072_af	Q14012	AD	0.0809514	0.0164355		0.174069	0.0370544
ENSG00000253309_af	A8MV23	AD	0.0809661	0.016447		0.207504	0.0440573
ENSG00000125384_af	P43116	AD	0.0811147	0.0164585		0.00582643	0.00131805
ENSG00000206559_af	Q504Y3	AD	0.0811534	0.0164699		0.726077	0.14855
ENSG00000145901_af	Q15025	AD	0.0811619	0.0164814		0.0321265	0.00720917
ENSG00000109736_af	Q14728	AD	0.08122	0.0164928		0.297251	0.0625673
ENSG00000233175_af	O95466	AD	0.0814454	0.0165043		0.29994	0.0631175
ENSG00000158477_af	P06126	AD	0.0814545	0.0165158		0.159644	0.0342693
ENSG00000125726_af	P32970	AD	0.0814559	0.0165272		0.0785651	0.0168367
ENSG00000005961_af	P08514	AD	0.0814674	0.0165387		0.0978552	0.0205387
ENSG00000221938_af	Q96R47	AD	0.0814705	0.0165501		0.0992228	0.0208367
ENSG00000259514_af	Q96A47	AD	0.0815298	0.0165616		0.0667397	0.014384
ENSG00000000971_af	P08603	AD	0.0815312	0.0165731		0.26753	0.0564355
ENSG00000230432_af	Q16849	AD	0.0815699	0.0165845		0.119167	0.0252034
ENSG00000183196_af	Q9GZX3	AD	0.0816642	0.016596		0.0968547	0.0203095
ENSG00000203472_af	Q9GZX3	AD	0.0816642	0.0166074		0.0968548	0.0203209
ENSG00000171724_af	Q9HCJ6	AD	0.0816814	0.0166189		0.452871	0.0944298
ENSG00000109181_af	P36537	AD	0.0817213	0.0166304		0.108885	0.0229799
ENSG00000156170_af	Q330K2	AD	0.0819194	0.0166418		0.130475	0.0275989
ENSG00000100105_af	Q9HBE1	AD	0.0819298	0.0166533		0.160117	0.034361
ENSG00000081019_af	Q5VWQ0	AD	0.0819573	0.0166648		0.289103	0.0609857
ENSG00000152954_af	Q8IZ57	AD	0.0820339	0.0166762		0.0487993	0.0107622
ENSG00000137218_af	O43559	AD	0.0821109	0.0166877		0.344327	0.0722063
ENSG00000112761_af	O95389	AD	0.0822111	0.0166991		0.0671936	0.01451
ENSG00000161526_af	Q9UHR5	AD	0.0822304	0.0167106		0.547204	0.113054
ENSG00000258891_af	Q86VK4	AD	0.0822816	0.0167221		0.93478	0.188447
ENSG00000169814_af	P43251	AD	0.0823572	0.0167335		0.119547	0.025341
ENSG00000154511_af	Q5T7M9	AD	0.0823879	0.016745		0.167172	0.0356562
ENSG00000160908_af	Q53GI3	AD	0.0823952	0.0167564		0.127482	0.0270716
ENSG00000198556_af	Q53GI3	AD	0.0823952	0.0167679		0.127482	0.0270831
ENSG00000171855_af	P01574	AD	0.0824721	0.0167794		0.169674	0.0360344
ENSG00000181323_af	Q8N4L4	AD	0.0824894	0.0167908		0.305902	0.0644011
ENSG00000124496_af	Q96PN7	AD	0.0824994	0.0168023		0.340487	0.0714613
ENSG00000163257_af	Q9NXF7	AD	0.0825791	0.0168138		0.0182968	0.00393123
ENSG00000173917_af	P14652	AD	0.0826266	0.0168252		0.00608426	0.00138682
ENSG00000144827_af	Q9NUJ1	AD	0.0826665	0.0168367		0.0779077	0.0166648
ENSG00000204653_af	A6ND91	AD	0.0826825	0.0168481		0.118772	0.0250659
ENSG00000111452_af	Q6QNK2	AD	0.0827803	0.0168596		0.0254075	0.00570774
ENSG00000123405_af	Q16621	AD	0.0827873	0.0168711		0.251348	0.0530086
ENSG00000130726_af	Q13263	AD	0.0827934	0.0168825		0.185561	0.0393696
ENSG00000025156_af	Q03933	AD	0.0828075	0.016894		0.0542091	0.0119656
ENSG00000119725_af	Q86VK4	AD	0.0828389	0.0169054		0.933479	0.188252
ENSG00000010292_af	Q15021	AD	0.0828973	0.0169169		0.35172	0.0738223
ENSG00000100335_af	Q9NQG6	AD	0.0829224	0.0169284		0.0196829	0.00428653
ENSG00000196152_af	Q15937	AD	0.0829697	0.0169398		0.341747	0.0718052
ENSG00000115998_af	Q9NWW7	AD	0.0830709	0.0169513		0.237636	0.0500287
ENSG00000179010_af	Q9Y605	AD	0.0830964	0.0169628		0.156148	0.033341
ENSG00000184897_af	Q92522	AD	0.0831239	0.0169742		0.076556	0.0164585
ENSG00000225243_af	Q99518	AD	0.0831397	0.0169857		0.02853	0.0064298
ENSG00000167525_af	Q8NCQ7	AD	0.0831444	0.0169971		0.136929	0.029192
ENSG00000118922_af	Q9Y4X4	AD	0.083234	0.0170086		0.065654	0.0141203
ENSG00000115977_af	Q2M2I8	AD	0.0832371	0.0170201		0.0661036	0.0142235
ENSG00000197753_af	Q8TAF8	AD	0.0832557	0.0170315		0.227357	0.048149
ENSG00000168843_af	Q8N475	AD	0.0833573	0.017043		0.0545901	0.0120115
ENSG00000081277_af	Q13835	AD	0.0834587	0.0170544		0.276634	0.0582235
ENSG00000054690_af	Q9ULM0	AD	0.0835459	0.0170659		0.403033	0.0839083
ENSG00000073861_af	Q9UL17	AD	0.0835633	0.0170774		0.152676	0.0325731
ENSG00000176209_af	Q96E16	AD	0.0836615	0.0170888		0.0419017	0.00913467
ENSG00000240563_af	Q5T7N2	AD	0.0836828	0.0171003		0.138659	0.029639
ENSG00000256061_af	Q8WXU2	AD	0.0837181	0.0171117		0.400425	0.0833811
ENSG00000188215_af	Q8IWE4	AD	0.0837585	0.0171232		0.229017	0.0485158
ENSG00000164209_af	Q96AG3	AD	0.0838255	0.0171347		0.131161	0.0277708
ENSG00000249993_af	Q13515	AD	0.0838353	0.0171461		0.294285	0.061937
ENSG00000178078_af	Q9UGK3	AD	0.0838949	0.0171576		0.0913525	0.0193582
ENSG00000018408_af	Q9GZV5	AD	0.0839086	0.0171691		0.0323911	0.00725501
ENSG00000161980_af	Q9Y2Y1	AD	0.0839206	0.0171805		0.822016	0.167095
ENSG00000100258_af	Q9BU23	AD	0.0840666	0.017192		0.0918626	0.0194384
ENSG00000117448_af	P14550	AD	0.0840691	0.0172034		0.0709018	0.0153582
ENSG00000008283_af	P49447	AD	0.0840768	0.0172149		0.0231083	0.00523782
ENSG00000171759_af	P00439	AD	0.0840803	0.0172264		0.338695	0.0710716
ENSG00000133069_af	O75069	AD	0.0843626	0.0172378		0.343257	0.0720688
ENSG00000099860_af	O75293	AD	0.084424	0.0172493		0.062441	0.0135244
ENSG00000139974_af	Q8IZM9	AD	0.0844266	0.0172607		0.623199	0.127908
ENSG00000154548_af	Q8WXF0	AD	0.0844413	0.0172722		0.157113	0.0336046
ENSG00000196189_af	Q9H3S1	AD	0.084521	0.0172837		0.0373303	0.00833238
ENSG00000181752_af	Q8NH50	AD	0.0845576	0.0172951		0.309696	0.0652264
ENSG00000119335_af	Q01105	AD	0.0845637	0.0173066		0.437303	0.0909685
ENSG00000230319_af	O95922	AD	0.0845684	0.0173181		0.235937	0.0496848
ENSG00000170581_af	P52630	AD	0.0846021	0.0173295		0.577463	0.119301
ENSG00000143842_af	Q9UN79	AD	0.0846117	0.017341		0.502696	0.104447
ENSG00000174482_af	Q7L985	AD	0.084626	0.0173524		0.0760961	0.0163897
ENSG00000113569_af	O75694	AD	0.0846562	0.0173639		0.0773444	0.0165845
ENSG00000172660_af	Q92804	AD	0.0846925	0.0173754		0.0457118	0.00998281
ENSG00000137707_af	Q9NY30	AD	0.0847689	0.0173868		0.0488592	0.0107736
ENSG00000095015_af	Q13233	AD	0.0847933	0.0173983		0.523869	0.108298
ENSG00000162891_af	Q9NYY1	AD	0.0848686	0.0174097		0.0829063	0.0177536
ENSG00000113212_af	Q9Y5E2	AD	0.0849792	0.0174212		0.0781431	0.016745
ENSG00000140274_af	Q1HG44	AD	0.0849841	0.0174327		0.14252	0.0304756
ENSG00000140350_af	P39687	AD	0.0849853	0.0174441		0.282715	0.0596562
ENSG00000177464_af	P46093	AD	0.084991	0.0174556		0.175392	0.0373295
ENSG00000171766_af	P50440	AD	0.0851261	0.017467		0.586149	0.120768
ENSG00000166086_af	Q9BX67	AD	0.085128	0.0174785		0.0132471	0.0029341
ENSG00000267041_af	Q8N184	AD	0.0851652	0.01749		0.396487	0.0825673
ENSG00000111335_af	P29728	AD	0.0851936	0.0175014		0.312557	0.0657994
ENSG00000177479_af	O95376	AD	0.0851966	0.0175129		0.487972	0.101352
ENSG00000138834_af	Q9UPT6	AD	0.0852654	0.0175244		0.144342	0.0308424
ENSG00000094963_af	Q99518	AD	0.0852905	0.0175358		0.0305093	0.00669341
ENSG00000072080_af	Q13103	AD	0.0853413	0.0175473		0.366319	0.0766762
ENSG00000129691_af	Q9UBL3	AD	0.0854307	0.0175587		0.133126	0.0282521
ENSG00000164808_af	Q14159	AD	0.0855179	0.0175702		0.360315	0.0755759
ENSG00000224470_af	P0C7T5	AD	0.085525	0.0175817		0.13973	0.029914
ENSG00000182149_af	P0C7T5	AD	0.085525	0.0175931		0.139731	0.0299255
ENSG00000113578_af	P05230	AD	0.0855557	0.0176046		0.0849063	0.0182006
ENSG00000231185_af	P05230	AD	0.0855557	0.017616		0.0849063	0.0181891
ENSG00000144119_af	Q7Z5L3	AD	0.0857254	0.0176275		0.0637117	0.013765
ENSG00000125734_af	Q9NPR9	AD	0.0859331	0.017639		0.0613881	0.0132722
ENSG00000076864_af	P47736	AD	0.0859377	0.0176504		0.494605	0.102751
ENSG00000110455_af	Q96QU6	AD	0.0859914	0.0176619		0.684593	0.140298
ENSG00000221840_af	Q8NH83	AD	0.0860068	0.0176734		0.912547	0.184539
ENSG00000122718_af	Q9NQN1	AD	0.0861845	0.0176848		0.163387	0.0348195
ENSG00000086544_af	Q96DU7	AD	0.0862003	0.0176963		0.0530767	0.0117479
ENSG00000143167_af	Q99795	AD	0.0862083	0.0177077		0.369718	0.0772951
ENSG00000229941_af	Q9HCR9	AD	0.0862105	0.0177192		0.189405	0.0401032
ENSG00000206418_af	Q6IQ22	AD	0.0862174	0.0177307		0.0096703	0.00202865
ENSG00000005955_af	Q9H3C7	AD	0.0862661	0.0177421		0.253243	0.0534785
ENSG00000196172_af	Q96N22	AD	0.0862688	0.0177536		0.0407335	0.00881375
ENSG00000008311_af	Q9UDR5	AD	0.0865378	0.017765		0.0818714	0.017467
ENSG00000159199_af	P05496	AD	0.0865805	0.0177765		0.12519	0.0264986
ENSG00000172059_af	O14901	AD	0.0866386	0.017788		0.405439	0.0844355
ENSG00000162753_af	Q5TAH2	AD	0.0866504	0.0177994		0.132917	0.0281834
ENSG00000140557_af	Q92186	AD	0.0866504	0.0178109		0.463348	0.0965043
ENSG00000124570_af	P35237	AD	0.0866566	0.0178223		0.442236	0.0920344
ENSG00000205758_af	O95825	AD	0.0867425	0.0178338		0.0545916	0.0120229
ENSG00000176225_af	Q86VV8	AD	0.0868603	0.0178453		0.560981	0.116046
ENSG00000114013_af	P42081	AD	0.086873	0.0178567		0.12794	0.0271404
ENSG00000230435_af	Q9UPZ6	AD	0.0871221	0.0178682		0.0565302	0.0123209
ENSG00000186190_af	P59826	AD	0.0871333	0.0178797		0.191526	0.040596
ENSG00000137434_af	Q5T4I8	AD	0.0871431	0.0178911		0.156263	0.0333639
ENSG00000157343_af	Q5T9G4	AD	0.0872282	0.0179026		0.0936439	0.0197822
ENSG00000135540_af	Q5SYE7	AD	0.0873133	0.017914		0.871466	0.176298
ENSG00000136144_af	Q8NDN9	AD	0.0873474	0.0179255		0.455837	0.0950831
ENSG00000183569_af	Q9H4I8	AD	0.0873511	0.017937		0.0463325	0.0101433
ENSG00000144591_af	Q96IJ6	AD	0.0874157	0.0179484		0.50187	0.104172
ENSG00000258064_af	Q96HH6	AD	0.0875199	0.0179599		0.0298352	0.00660172
ENSG00000128802_af	Q9UK05	AD	0.0875391	0.0179713		0.283692	0.0598968
ENSG00000109101_af	O15353	AD	0.0875401	0.0179828		0.188846	0.0400229
ENSG00000124196_af	Q9H1H1	AD	0.0876164	0.0179943		0.152905	0.0326418
ENSG00000168787_af	P58182	AD	0.0876428	0.0180057		0.0220307	0.00498567
ENSG00000161920_af	Q9P086	AD	0.0876707	0.0180172		0.333563	0.0699943
ENSG00000011083_af	Q99884	AD	0.0876709	0.0180287		0.300506	0.063255
ENSG00000139436_af	Q14161	AD	0.0876969	0.0180401		0.137714	0.0294097
ENSG00000136541_af	Q8TAM6	AD	0.0877583	0.0180516		0.199415	0.0424183
ENSG00000235942_af	A0A183	AD	0.0878182	0.018063		0.271083	0.0571576
ENSG00000196812_af	Q9H4T2	AD	0.0878415	0.0180745		0.120857	0.0255702
ENSG00000269293_af	Q9H4T2	AD	0.0878415	0.018086		0.120857	0.0255817
ENSG00000120438_af	P17987	AD	0.0878894	0.0180974		0.490034	0.101834
ENSG00000137824_af	Q96TC7	AD	0.0879082	0.0181089		0.0705071	0.0152779
ENSG00000125207_af	Q96J94	AD	0.0879166	0.0181203		0.0144006	0.00320917
ENSG00000237440_af	O75373	AD	0.0881369	0.0181318		0.086075	0.0184069
ENSG00000221886_af	Q8IZ13	AD	0.0883459	0.0181433		0.241501	0.0507622
ENSG00000187980_af	Q5R387	AD	0.088397	0.0181547		0.0540009	0.0119312
ENSG00000110395_af	P22681	AD	0.0884369	0.0181662		0.0927094	0.0195759
ENSG00000165623_af	Q8WVF2	AD	0.0885294	0.0181777		0.0819485	0.0175244
ENSG00000241127_af	Q9NRH1	AD	0.0886133	0.0181891		0.482523	0.100126
ENSG00000101452_af	Q9H5Z1	AD	0.0886434	0.0182006		0.493505	0.102533
ENSG00000164296_af	Q17RP2	AD	0.0887058	0.018212		0.0625824	0.0135702
ENSG00000163823_af	P32246	AD	0.0887166	0.0182235		0.22426	0.0474499
ENSG00000106462_af	Q15910	AD	0.0887768	0.018235		0.0133008	0.00294556
ENSG00000138030_af	P50053	AD	0.0888622	0.0182464		0.0838656	0.0179255
ENSG00000105246_af	Q14213	AD	0.0891435	0.0182579		0.123153	0.0260516
ENSG00000136100_af	Q86VN1	AD	0.0891784	0.0182693		0.123916	0.0262006
ENSG00000135451_af	Q12815	AD	0.0892282	0.0182808		0.12193	0.0258109
ENSG00000258657_af	P10144	AD	0.0892634	0.0182923		0.0742825	0.0160344
ENSG00000100453_af	P10144	AD	0.0892634	0.0183037		0.0742824	0.0160229
ENSG00000100139_af	Q8N3F8	AD	0.0892837	0.0183152		0.2622	0.0553696
ENSG00000100393_af	Q09472	AD	0.0894023	0.0183266		0.0427824	0.00937536
ENSG00000156575_af	Q9Y2Y8	AD	0.0894438	0.0183381		0.230316	0.0486991
ENSG00000128581_af	Q9H7X7	AD	0.0894438	0.0183496		0.165788	0.0353696
ENSG00000162494_af	Q5VT99	AD	0.0895327	0.018361		0.0948369	0.0199771
ENSG00000189030_af	Q6RSH7	AD	0.0895771	0.0183725		0.46465	0.0967794
ENSG00000239791_af	A8K8V0	AD	0.0895777	0.018384		0.237192	0.0498797
ENSG00000172000_af	Q9HAH1	AD	0.0896145	0.0183954		0.326494	0.0684928
ENSG00000175395_af	P17030	AD	0.0896243	0.0184069		0.603803	0.124023
ENSG00000124635_af	P06899	AD	0.0896257	0.0184183		0.319142	0.0669685
ENSG00000197162_af	A8K8V0	AD	0.0896805	0.0184298		0.237722	0.0500516
ENSG00000118503_af	P21580	AD	0.0898091	0.0184413		0.365774	0.0765731
ENSG00000204970_af	Q9UN73	AD	0.0898487	0.0184527		0.0883114	0.0187622
ENSG00000081842_af	Q9UN73	AD	0.0898487	0.0184642		0.0883114	0.0187851
ENSG00000204969_af	Q9UN73	AD	0.0898487	0.0184756		0.0883114	0.018808
ENSG00000255408_af	Q9UN73	AD	0.0898487	0.0184871		0.0883114	0.0187736
ENSG00000204965_af	Q9UN73	AD	0.0898487	0.0184986		0.0883114	0.0188195
ENSG00000204967_af	Q9UN73	AD	0.0898487	0.01851		0.0883114	0.0187966
ENSG00000080644_af	P32297	AD	0.089854	0.0185215		0.153307	0.0327106
ENSG00000167081_af	P40426	AD	0.0898767	0.018533		0.320565	0.0673009
ENSG00000267992_af	Q8NI29	AD	0.0899761	0.0185444		0.0939471	0.019851
ENSG00000168329_af	P49238	AD	0.0899913	0.0185559		0.0249506	0.00560458
ENSG00000112365_af	O43167	AD	0.0903045	0.0185673		0.0973309	0.0204241
ENSG00000150457_af	Q9NRM7	AD	0.0903773	0.0185788		0.56142	0.116126
ENSG00000106070_af	Q13322	AD	0.0903945	0.0185903		0.225369	0.0476103
ENSG00000117450_af	Q06830	AD	0.0903951	0.0186017		0.2553	0.0540172
ENSG00000129472_af	Q8WUD1	AD	0.0904503	0.0186132		0.341616	0.0717822
ENSG00000259972_af	P51665	AD	0.0905336	0.0186246		0.123005	0.0260287
ENSG00000090487_af	Q9NZD8	AD	0.0905631	0.0186361		0.503191	0.104562
ENSG00000092853_af	Q9HAW4	AD	0.0906165	0.0186476		0.412139	0.0858453
ENSG00000143450_af	Q9BYD2	AD	0.0906375	0.018659		0.544932	0.11263
ENSG00000233101_af	P14651	AD	0.0906824	0.0186705		0.0199922	0.00437822
ENSG00000120093_af	P14651	AD	0.0906824	0.0186819		0.0199924	0.00438968
ENSG00000026025_af	P08670	AD	0.0907249	0.0186934		0.222705	0.0471519
ENSG00000248664_af	Q8TAD4	AD	0.090786	0.0187049		0.350645	0.0735931
ENSG00000169231_af	P49746	AD	0.0908321	0.0187163		0.00685449	0.00153582
ENSG00000163694_af	A0AV96	AD	0.0909255	0.0187278		0.33924	0.0711862
ENSG00000196196_af	Q6UXD1	AD	0.0909312	0.0187393		0.108131	0.0228653
ENSG00000166736_af	P46098	AD	0.0909333	0.0187507		0.137472	0.0293639
ENSG00000167769_af	Q8TDN7	AD	0.0910261	0.0187622		0.127034	0.0269456
ENSG00000109205_af	A1E959	AD	0.0910622	0.0187736		0.244322	0.0514384
ENSG00000189042_af	Q8N184	AD	0.0911338	0.0187851		0.419324	0.0874384
ENSG00000155090_af	Q13118	AD	0.0911355	0.0187966		0.142937	0.0305673
ENSG00000250254_af	Q9NZH5	AD	0.091294	0.018808		0.308612	0.0649284
ENSG00000179562_af	Q96CN9	AD	0.0913388	0.0188195		0.703962	0.144011
ENSG00000107984_af	O94907	AD	0.0914641	0.0188309		0.22256	0.0470831
ENSG00000113300_af	Q9ULM6	AD	0.0914769	0.0188424		0.0607065	0.0131691
ENSG00000109956_af	Q9P2W7	AD	0.0915107	0.0188539		0.490602	0.101983
ENSG00000125851_af	P16519	AD	0.0915862	0.0188653		0.0444521	0.00969628
ENSG00000105370_af	P55344	AD	0.0916415	0.0188768		0.374476	0.0781891
ENSG00000145494_af	O75380	AD	0.0916551	0.0188883		0.44457	0.0925158
ENSG00000075420_af	Q53EP0	AD	0.0916821	0.0188997		0.273374	0.0575014
ENSG00000185774_af	Q6PIL6	AD	0.0918018	0.0189112		0.0440565	0.00966189
ENSG00000160191_af	O76083	AD	0.0918252	0.0189226		0.44148	0.0918281
ENSG00000128000_af	Q9Y6R6	AD	0.0918431	0.0189341		0.369189	0.0771805
ENSG00000138771_af	Q8TF72	AD	0.091873	0.0189456		0.397331	0.0827736
ENSG00000111783_af	Q33E94	AD	0.0919255	0.018957		0.571678	0.118063
ENSG00000175581_af	Q96GC5	AD	0.0919778	0.0189685		0.124638	0.026361
ENSG00000171307_af	Q969W1	AD	0.0920325	0.0189799		0.0139284	0.00304871
ENSG00000256706_af	Q7Z3S7	AD	0.0921855	0.0189914		0.061248	0.0132607
ENSG00000197093_af	Q96RP7	AD	0.092197	0.0190029		0.104194	0.0218797
ENSG00000102780_af	Q86XP1	AD	0.0922222	0.0190143		0.124467	0.0262923
ENSG00000169758_af	Q2M3C6	AD	0.0922763	0.0190258		0.251614	0.053043
ENSG00000187550_af	P0C263	AD	0.0922806	0.0190372		0.0809456	0.0172607
ENSG00000151729_af	P12235	AD	0.0923186	0.0190487		0.120424	0.0255129
ENSG00000078487_af	Q9H0M4	AD	0.0924027	0.0190602		0.205069	0.0435874
ENSG00000196227_af	Q9NTX9	AD	0.0924315	0.0190716		0.201481	0.0428195
ENSG00000113749_af	P25021	AD	0.0924537	0.0190831		0.665256	0.136527
ENSG00000147655_af	Q6UXX9	AD	0.0925019	0.0190946		0.693051	0.141822
ENSG00000265751_af	Q9C091	AD	0.0926365	0.019106		0.3289	0.0689971
ENSG00000137634_af	Q6UWF7	AD	0.0926392	0.0191175		0.649135	0.133364
ENSG00000204366_af	Q9Y330	AD	0.0926409	0.0191289		0.0411744	0.00898567
ENSG00000139083_af	P41212	AD	0.0926511	0.0191404		0.0565906	0.0123438
ENSG00000198171_af	Q96HY6	AD	0.0928275	0.0191519		0.485708	0.100871
ENSG00000070019_af	P25092	AD	0.0929417	0.0191633		0.123706	0.0261203
ENSG00000087077_af	Q15654	AD	0.0929638	0.0191748		0.121244	0.0256619
ENSG00000133393_af	Q96NB1	AD	0.0929757	0.0191862		0.0161426	0.00354155
ENSG00000100427_af	Q15049	AD	0.0930156	0.0191977		0.115335	0.0243095
ENSG00000213762_af	P52741	AD	0.0930639	0.0192092		0.129145	0.0273467
ENSG00000051341_af	O75417	AD	0.0931048	0.0192206		0.692134	0.141673
ENSG00000156219_af	Q13508	AD	0.0931602	0.0192321		0.20287	0.0430143
ENSG00000156970_af	O60566	AD	0.0931688	0.0192436		0.260306	0.0549685
ENSG00000005339_af	Q92793	AD	0.0931765	0.019255		0.554976	0.114739
ENSG00000112651_af	Q5T653	AD	0.0933733	0.0192665		0.131241	0.0277937
ENSG00000176909_af	Q6ZN01	AD	0.0934352	0.0192779		0.145236	0.0309914
ENSG00000177459_af	Q6P6B1	AD	0.0935511	0.0192894		0.0654839	0.014063
ENSG00000125319_af	Q8N3J3	AD	0.0935644	0.0193009		0.308833	0.0650201
ENSG00000134962_af	Q86Z14	AD	0.0936151	0.0193123		0.0746462	0.0161032
ENSG00000188641_af	Q12882	AD	0.0936181	0.0193238		0.0732572	0.0158625
ENSG00000136856_af	Q9NY64	AD	0.0936666	0.0193352		0.484407	0.100539
ENSG00000198586_af	Q9UKI8	AD	0.0938038	0.0193467		0.0429643	0.00940974
ENSG00000273388_af	Q9UKX3	AD	0.0938357	0.0193582		0.0665533	0.0143725
ENSG00000136928_af	O75899	AD	0.0939172	0.0193696		0.289671	0.0610888
ENSG00000165879_af	Q92837	AD	0.0940522	0.0193811		0.133248	0.0283209
ENSG00000172457_af	Q8NGQ1	AD	0.0942202	0.0193926		0.0650652	0.0139599
ENSG00000159086_af	Q9Y5B6	AD	0.0943308	0.019404		0.205179	0.0436218
ENSG00000130762_af	Q5VV41	AD	0.0943528	0.0194155		0.393886	0.0819828
ENSG00000147687_af	Q6P1N9	AD	0.0944279	0.0194269		0.0472199	0.0103152
ENSG00000181773_af	P46089	AD	0.0945017	0.0194384		0.097363	0.0204355
ENSG00000131686_af	P23280	AD	0.0948761	0.0194499		0.203821	0.0433009
ENSG00000181631_af	Q9BPV8	AD	0.0949569	0.0194613		0.00537902	0.00124928
ENSG00000182156_af	Q6UWV6	AD	0.0949671	0.0194728		0.131324	0.0278281
ENSG00000092969_af	P61812	AD	0.0950075	0.0194842		0.100592	0.021192
ENSG00000104853_af	O96005	AD	0.0950387	0.0194957		0.244502	0.0514728
ENSG00000167004_af	P30101	AD	0.0952054	0.0195072		0.38804	0.0808481
ENSG00000183579_af	Q9ULT6	AD	0.0952098	0.0195186		0.0847286	0.018086
ENSG00000139718_af	Q9UPS6	AD	0.0952334	0.0195301		0.232566	0.0491347
ENSG00000165355_af	Q7Z6M2	AD	0.0952666	0.0195415		0.176551	0.0376275
ENSG00000182255_af	P22459	AD	0.0952799	0.019553		0.231936	0.0490659
ENSG00000168014_af	Q4AC94	AD	0.095315	0.0195645		0.45944	0.0957593
ENSG00000181291_af	Q6IEE7	AD	0.0953783	0.0195759		0.471545	0.0982006
ENSG00000151718_af	Q6AWC2	AD	0.0954769	0.0195874		0.0185499	0.00403438
ENSG00000187766_af	P60410	AD	0.0956215	0.0195989		0.216932	0.0460172
ENSG00000155636_af	Q8IUH3	AD	0.0956919	0.0196103		0.137989	0.029467
ENSG00000177721_af	Q3ZCQ2	AD	0.0957116	0.0196218		0.206143	0.0437822
ENSG00000114021_af	Q9NQR4	AD	0.0957698	0.0196332		0.320918	0.067404
ENSG00000131652_af	Q86W42	AD	0.0957732	0.0196447		0.0177453	0.00382808
ENSG00000231748_af	Q2TB90	AD	0.0957944	0.0196562		0.0305752	0.00670487
ENSG00000267984_af	P38117	AD	0.0958233	0.0196676		0.203844	0.0433238
ENSG00000173545_af	Q969S3	AD	0.0958984	0.0196791		0.597077	0.122797
ENSG00000157211_af	Q5VXM1	AD	0.0959561	0.0196905		0.0422378	0.0092149
ENSG00000184545_af	Q13202	AD	0.0959897	0.019702		0.0705593	0.0153123
ENSG00000182208_af	Q70IA6	AD	0.0960813	0.0197135		0.152004	0.0323668
ENSG00000198732_af	Q9H4F8	AD	0.096126	0.0197249		0.419749	0.0875072
ENSG00000232040_af	Q6R2W3	AD	0.0962049	0.0197364		0.601549	0.123622
ENSG00000198252_af	Q8WUJ0	AD	0.0962532	0.0197479		0.0585191	0.0127679
ENSG00000166923_af	O60565	AD	0.0962587	0.0197593		0.0727844	0.0157479
ENSG00000104129_af	Q9NVM6	AD	0.0962646	0.0197708		0.100345	0.0211232
ENSG00000177575_af	Q86VB7	AD	0.0965166	0.0197822		0.635451	0.130418
ENSG00000152784_af	Q9NQV8	AD	0.096598	0.0197937		0.182141	0.0387736
ENSG00000189181_af	A6ND48	AD	0.0966195	0.0198052		0.144403	0.0308653
ENSG00000088926_af	P03951	AD	0.0966731	0.0198166		0.23873	0.0502693
ENSG00000182606_af	Q9UPV9	AD	0.0967029	0.0198281		0.0212599	0.00483668
ENSG00000173163_af	Q8N668	AD	0.09675	0.0198395		0.485227	0.100722
ENSG00000115548_af	Q9Y4C1	AD	0.0967972	0.019851		0.413331	0.0860401
ENSG00000090905_af	Q8NDV7	AD	0.0968285	0.0198625		0.510909	0.10588
ENSG00000138587_af	Q8NEH6	AD	0.0969759	0.0198739		0.141857	0.0302579
ENSG00000154262_af	Q8N139	AD	0.0970549	0.0198854		0.0504946	0.0112206
ENSG00000110172_af	Q9UHD1	AD	0.0971724	0.0198968		0.237966	0.0500974
ENSG00000160113_af	P10588	AD	0.0971891	0.0199083		0.11709	0.0247106
ENSG00000184967_af	Q9BVI4	AD	0.097204	0.0199198		0.440056	0.0915759
ENSG00000173641_af	Q9UBY9	AD	0.0972358	0.0199312		0.412107	0.0858338
ENSG00000164692_af	P08123	AD	0.097254	0.0199427		0.032779	0.00735817
ENSG00000267604_af	B2RV13	AD	0.0973113	0.0199542		0.117728	0.0248825
ENSG00000196139_af	P42330	AD	0.0973214	0.0199656		0.0736925	0.0159542
ENSG00000267379_af	P48960	AD	0.0973432	0.0199771		0.0335315	0.0074957
ENSG00000104976_af	Q13487	AD	0.0974381	0.0199885		0.0574252	0.012596
ENSG00000183741_af	O95503	AD	0.097464	0.02		0.136339	0.0290544
ENSG00000152076_af	Q96LY2	AD	0.0974825	0.0200115		0.234262	0.0493983
ENSG00000172365_af	Q96R09	AD	0.0976576	0.0200229		0.208068	0.0441948
ENSG00000088538_af	Q8IZD9	AD	0.0976591	0.0200344		0.211303	0.0450201
ENSG00000231256_af	B2RV13	AD	0.0977427	0.0200458		0.123762	0.0261547
ENSG00000124613_af	Q9UJN7	AD	0.0978974	0.0200573		0.404691	0.0842751
ENSG00000179218_af	P27797	AD	0.097947	0.0200688		0.361894	0.0758395
ENSG00000114248_af	Q6UY01	AD	0.0981072	0.0200802		0.0749347	0.0161719
ENSG00000146221_af	Q5JU00	AD	0.0981335	0.0200917		0.201515	0.0428309
ENSG00000130402_af	O43707	AD	0.0982795	0.0201032		0.362979	0.076
ENSG00000139631_af	Q9Y600	AD	0.0982808	0.0201146		0.0583143	0.0127335
ENSG00000028310_af	Q9H8M2	AD	0.098291	0.0201261		0.0631596	0.0136275
ENSG00000128342_af	P15018	AD	0.0983157	0.0201375		0.0718916	0.0155186
ENSG00000033011_af	Q6UX73	AD	0.0983186	0.020149		0.308999	0.0651232
ENSG00000153446_af	Q6UX73	AD	0.0983186	0.0201605		0.308995	0.0651117
ENSG00000104472_af	Q9NRG0	AD	0.0983432	0.0201719		0.184695	0.0391633
ENSG00000019505_af	Q7L8C5	AD	0.0984231	0.0201834		0.0671697	0.0144986
ENSG00000121101_af	Q8IWB6	AD	0.0985506	0.0201948		0.081572	0.0173868
ENSG00000168116_af	Q9HCI6	AD	0.0986362	0.0202063		0.696882	0.142487
ENSG00000151093_af	Q9NWU1	AD	0.0987894	0.0202178		0.157241	0.0336848
ENSG00000180318_af	Q15699	AD	0.0988472	0.0202292		0.520633	0.107805
ENSG00000196814_af	Q9H7P6	AD	0.0989003	0.0202407		0.195686	0.0416046
ENSG00000178104_af	Q5VU43	AD	0.0989039	0.0202521		0.0111162	0.00239542
ENSG00000044115_af	P35221	AD	0.0989637	0.0202636		0.0141938	0.0031404
ENSG00000100612_af	Q9Y394	AD	0.0989869	0.0202751		0.306982	0.0646648
ENSG00000182898_af	Q5QJ38	AD	0.0989899	0.0202865		0.326026	0.0684126
ENSG00000176273_af	Q2M3R5	AD	0.0990102	0.020298		0.0149726	0.00333524
ENSG00000257878_af	P09960	AD	0.0990286	0.0203095		0.281655	0.0593696
ENSG00000125650_af	O60542	AD	0.0991309	0.0203209		0.137512	0.0293754
ENSG00000135577_af	P28336	AD	0.0991571	0.0203324		0.281632	0.0593352
ENSG00000272599_af	Q86X67	AD	0.0991789	0.0203438		0.119517	0.0252951
ENSG00000130177_af	Q13042	AD	0.0994255	0.0203553		0.33841	0.0710029
ENSG00000166455_af	Q6P387	AD	0.099489	0.0203668		0.0216447	0.00493983
ENSG00000168792_af	Q6UXT9	AD	0.0994907	0.0203782		0.0869289	0.0185444
ENSG00000123094_af	Q8NHQ8	AD	0.0995028	0.0203897		0.0262611	0.00591404
ENSG00000212658_af	A8MX34	AD	0.0995275	0.0204011		0.0625495	0.0135473
ENSG00000214290_af	A8K830	AD	0.0995328	0.0204126		0.0208436	0.00466476
ENSG00000227484_af	Q8NEG7	AD	0.099588	0.0204241		0.361935	0.075851
ENSG00000084652_af	P40222	AD	0.0997162	0.0204355		0.0263482	0.00594842
ENSG00000069764_af	O15496	AD	0.0997601	0.020447		0.150472	0.0320802
ENSG00000058668_af	P23634	AD	0.0997716	0.0204585		0.406606	0.0847106
ENSG00000182521_af	Q6SJ96	AD	0.09997	0.0204699		0.480798	0.0998166
ENSG00000258637_af	Q9Y4C0	AD	0.0999883	0.0204814		0.171635	0.0365158
ENSG00000143436_af	Q9BYD2	AD	0.10011	0.0204928		0.607642	0.124997
ENSG00000080709_af	Q9H2S1	AD	0.100145	0.0205043		0.198889	0.0423152
ENSG00000168036_af	P35222	AD	0.100183	0.0205158		0.114639	0.0241375
ENSG00000166501_af	P05771	AD	0.100216	0.0205272		0.0399499	0.00874499
ENSG00000119508_af	Q92570	AD	0.100321	0.0205387		0.683414	0.140138
ENSG00000136535_af	Q16650	AD	0.100331	0.0205501		0.0315496	0.00697994
ENSG00000124532_af	Q9HD23	AD	0.100368	0.0205616		0.308938	0.0650774
ENSG00000183103_af	Q6UWN0	AD	0.10043	0.0205731		0.210921	0.0448711
ENSG00000134243_af	Q99523	AD	0.100472	0.0205845		0.244926	0.0515301
ENSG00000106993_af	Q7L3B6	AD	0.10058	0.020596		0.275531	0.0579484
ENSG00000168090_af	Q7L5N1	AD	0.100734	0.0206074		0.235869	0.0496619
ENSG00000167785_af	Q96NG5	AD	0.100914	0.0206189		0.224807	0.0475415
ENSG00000167634_af	Q8WX94	AD	0.101223	0.0206304		0.0743648	0.0160458
ENSG00000226235_af	Q68G75	AD	0.101233	0.0206418		0.283807	0.0599542
ENSG00000104267_af	P00918	AD	0.101384	0.0206533		0.368558	0.0771003
ENSG00000185838_af	Q9BYB4	AD	0.101443	0.0206648		0.69256	0.141708
ENSG00000143924_af	Q9HC35	AD	0.101496	0.0206762		0.551611	0.114017
ENSG00000095917_af	Q9BZJ3	AD	0.101562	0.0206877		0.051198	0.0114499
ENSG00000136754_af	Q8IZP0	AD	0.101755	0.0206991		0.0332194	0.00740401
ENSG00000160633_af	Q15424	AD	0.10181	0.0207106		0.247763	0.0521261
ENSG00000030304_af	O15146	AD	0.101909	0.0207221		0.126465	0.0267393
ENSG00000168658_af	Q502W6	AD	0.101978	0.0207335		0.11671	0.024596
ENSG00000227471_af	C9JRZ8	AD	0.101989	0.020745		0.321192	0.0674269
ENSG00000253618_af	Q8TAA5	AD	0.101999	0.0207564		0.094623	0.0199542
ENSG00000232263_af	Q3LHN0	AD	0.102048	0.0207679		0.318247	0.0668195
ENSG00000237027_af	Q9Y2G4	AD	0.10208	0.0207794		0.0786308	0.0168481
ENSG00000122376_af	P00367	AD	0.102114	0.0207908		0.00411133	0.000951289
ENSG00000187210_af	Q02742	AD	0.102133	0.0208023		0.0807728	0.0172264
ENSG00000215375_af	Q02045	AD	0.102138	0.0208138		0.736965	0.150705
ENSG00000138663_af	Q9BT78	AD	0.102158	0.0208252		0.164119	0.034957
ENSG00000203972_af	Q5SZD4	AD	0.102298	0.0208367		0.197242	0.0419484
ENSG00000062524_af	P29376	AD	0.102304	0.0208481		0.69273	0.141754
ENSG00000172500_af	O43427	AD	0.102336	0.0208596		0.169623	0.0360229
ENSG00000103034_af	Q9ULP0	AD	0.102338	0.0208711		0.469904	0.0977994
ENSG00000138190_af	Q8TAG9	AD	0.102453	0.0208825		0.329237	0.0690315
ENSG00000100346_af	Q9P0X4	AD	0.102534	0.020894		0.412609	0.085937
ENSG00000259076_af	Q96LQ0	AD	0.102604	0.0209054		0.0530008	0.0117135
ENSG00000187871_af	Q6UXV0	AD	0.102651	0.0209169		0.114097	0.0239312
ENSG00000215910_af	Q5SNV9	AD	0.102844	0.0209284		0.215675	0.0457994
ENSG00000158481_af	P29017	AD	0.10298	0.0209398		0.115948	0.0244011
ENSG00000213066_af	O95684	AD	0.103008	0.0209513		0.111086	0.0233582
ENSG00000259577_af	Q9NQX4	AD	0.103021	0.0209628		0.180778	0.038533
ENSG00000257702_af	Q6XYB7	AD	0.103065	0.0209742		0.271747	0.0572149
ENSG00000144791_af	Q9UGP4	AD	0.10313	0.0209857		0.51654	0.10706
ENSG00000215545_af	Q30KQ4	AD	0.103186	0.0209971		0.51886	0.107553
ENSG00000228192_af	Q96PL5	AD	0.103312	0.0210086		0.140718	0.030086
ENSG00000140332_af	Q04726	AD	0.103392	0.0210201		0.176564	0.0376504
ENSG00000178217_af	Q5SQS7	AD	0.103431	0.0210315		0.194558	0.0412607
ENSG00000186960_af	Q86U37	AD	0.103509	0.021043		0.02374	0.00538682
ENSG00000188501_af	Q6UWM7	AD	0.103535	0.0210544		0.0538432	0.0118854
ENSG00000168005_af	Q9BUA3	AD	0.103574	0.0210659		0.327904	0.0687908
ENSG00000204427_af	O95870	AD	0.10363	0.0210774		0.0673936	0.0145903
ENSG00000100170_af	P13866	AD	0.103702	0.0210888		0.117634	0.0248711
ENSG00000007516_af	O94812	AD	0.103874	0.0211003		0.0647387	0.0138911
ENSG00000167608_af	Q7Z404	AD	0.103911	0.0211117		0.0193934	0.00422923
ENSG00000114626_af	Q969K4	AD	0.103974	0.0211232		0.11894	0.0251347
ENSG00000064195_af	O60479	AD	0.104002	0.0211347		0.163253	0.0347966
ENSG00000114315_af	Q14469	AD	0.104094	0.0211461		0.377364	0.0787622
ENSG00000129038_af	Q08397	AD	0.104288	0.0211576		0.137833	0.0294327
ENSG00000153292_af	Q5T601	AD	0.10436	0.0211691		0.112424	0.0235989
ENSG00000116985_af	P34820	AD	0.104391	0.0211805		0.531637	0.109994
ENSG00000023191_af	P13489	AD	0.104405	0.021192		0.159773	0.0342923
ENSG00000132842_af	O00203	AD	0.104589	0.0212034		0.64537	0.132355
ENSG00000089639_af	Q9P107	AD	0.104597	0.0212149		0.167164	0.0356447
ENSG00000196503_af	Q6T311	AD	0.104618	0.0212264		0.0376786	0.00838968
ENSG00000111144_af	P09960	AD	0.104662	0.0212378		0.368205	0.0770544
ENSG00000143226_af	P12318	AD	0.104832	0.0212493		0.244164	0.0514155
ENSG00000143322_af	P42684	AD	0.104898	0.0212607		0.275262	0.0578682
ENSG00000213020_af	Q8N823	AD	0.105097	0.0212722		0.247157	0.052
ENSG00000259201_af	Q9NYL9	AD	0.105226	0.0212837		0.055144	0.0121375
ENSG00000176532_af	Q8IV56	AD	0.105285	0.0212951		0.570486	0.11788
ENSG00000196083_af	Q9NPH3	AD	0.105378	0.0213066		0.348706	0.0731691
ENSG00000131467_af	P61289	AD	0.105548	0.0213181		0.0451068	0.00984527
ENSG00000106636_af	O15498	AD	0.105567	0.0213295		0.119442	0.0252837
ENSG00000054598_af	Q12948	AD	0.105675	0.021341		0.193571	0.0410544
ENSG00000164087_af	Q8NBT0	AD	0.105818	0.0213524		0.319393	0.0670372
ENSG00000163380_af	Q0VAK6	AD	0.105828	0.0213639		0.0883697	0.0188309
ENSG00000151612_af	Q17R98	AD	0.105833	0.0213754		0.0745376	0.0160917
ENSG00000105341_af	Q9NW81	AD	0.105837	0.0213868		0.116422	0.0245272
ENSG00000102678_af	P31371	AD	0.105847	0.0213983		0.299029	0.0628653
ENSG00000158445_af	Q14721	AD	0.10591	0.0214097		0.0548406	0.0120917
ENSG00000174718_af	Q9HCM1	AD	0.105952	0.0214212		0.063714	0.0137765
ENSG00000010282_af	Q9HCP6	AD	0.105953	0.0214327		0.345876	0.0725501
ENSG00000169085_af	Q8TAG6	AD	0.105986	0.0214441		0.102662	0.0215702
ENSG00000106261_af	P17029	AD	0.106009	0.0214556		0.305193	0.064298
ENSG00000153993_af	O95025	AD	0.106094	0.021467		0.186237	0.0394842
ENSG00000100888_af	Q9HCK8	AD	0.106107	0.0214785		0.3704	0.0774097
ENSG00000135338_af	Q86VQ0	AD	0.106167	0.02149		0.0214341	0.00489398
ENSG00000122970_af	Q8WYA0	AD	0.106171	0.0215014		0.545042	0.112642
ENSG00000258983_af	Q16825	AD	0.106173	0.0215129		0.380247	0.0793467
ENSG00000204568_af	Q9Y676	AD	0.106173	0.0215244		0.0497897	0.0110258
ENSG00000214513_af	A8MTQ0	AD	0.106214	0.0215358		0.103094	0.0216734
ENSG00000173239_af	Q5VYY2	AD	0.106289	0.0215473		0.768703	0.157077
ENSG00000104907_af	Q9NXH9	AD	0.106316	0.0215587		0.0935694	0.0197708
ENSG00000010244_af	O43670	AD	0.106423	0.0215702		0.0139589	0.00306017
ENSG00000184678_af	Q16778	AD	0.106565	0.0215817		0.27052	0.0570201
ENSG00000187713_af	Q969S6	AD	0.106745	0.0215931		0.0516762	0.0115072
ENSG00000114416_af	P51114	AD	0.106751	0.0216046		0.0754926	0.0162178
ENSG00000146433_af	Q9P2C4	AD	0.10677	0.021616		0.213582	0.0454097
ENSG00000161682_af	A8MVW0	AD	0.10689	0.0216275		0.238561	0.0502235
ENSG00000040731_af	Q9Y6N8	AD	0.106901	0.021639		0.108451	0.0228883
ENSG00000047410_af	P12270	AD	0.106911	0.0216504		0.0134905	0.00301433
ENSG00000169488_af	Q8NH41	AD	0.106935	0.0216619		0.615878	0.126556
ENSG00000213722_af	O95865	AD	0.106942	0.0216734		0.676902	0.138659
ENSG00000204070_af	Q9Y2B4	AD	0.106948	0.0216848		0.666323	0.136734
ENSG00000239388_af	A6NK59	AD	0.106969	0.0216963		0.154806	0.0330659
ENSG00000009830_af	Q9UKY4	AD	0.10702	0.0217077		0.108764	0.0229456
ENSG00000088543_af	Q9UK00	AD	0.107056	0.0217192		0.264832	0.0559083
ENSG00000127580_af	Q96S15	AD	0.107057	0.0217307		0.101961	0.021467
ENSG00000176971_af	Q8TAL6	AD	0.107125	0.0217421		0.0935629	0.0197593
ENSG00000236137_af	Q93033	AD	0.107156	0.0217536		0.177188	0.0377765
ENSG00000106211_af	P04792	AD	0.107164	0.021765		0.445914	0.0929054
ENSG00000136929_af	Q9BXL5	AD	0.107196	0.0217765		0.0710503	0.0153696
ENSG00000105523_af	Q2M2I3	AD	0.10729	0.021788		0.125364	0.0265444
ENSG00000167641_af	Q96A00	AD	0.107321	0.0217994		0.10511	0.0221203
ENSG00000100711_af	Q9BQ24	AD	0.107326	0.0218109		0.40371	0.0840115
ENSG00000255158_af	O75398	AD	0.107436	0.0218223		0.254241	0.0537421
ENSG00000124302_af	Q9H2A9	AD	0.107465	0.0218338		0.490037	0.101845
ENSG00000104808_af	Q9UQ10	AD	0.107569	0.0218453		0.243392	0.0512665
ENSG00000169327_af	Q8NGC0	AD	0.107581	0.0218567		0.0210165	0.0047106
ENSG00000168546_af	O00451	AD	0.107756	0.0218682		0.458917	0.0956791
ENSG00000198915_af	Q8N9B8	AD	0.107774	0.0218797		0.207429	0.0440344
ENSG00000221910_af	O95006	AD	0.107936	0.0218911		0.217056	0.0460401
ENSG00000100429_af	Q969S8	AD	0.10796	0.0219026		0.214308	0.0455587
ENSG00000188130_af	Q969S8	AD	0.10796	0.021914		0.214306	0.0455473
ENSG00000213578_af	Q8WVH0	AD	0.107965	0.0219255		0.0462444	0.0101318
ENSG00000162992_af	Q13562	AD	0.108046	0.021937		0.116573	0.0245731
ENSG00000170892_af	Q9BSV6	AD	0.108063	0.0219484		0.179701	0.0383266
ENSG00000108559_af	Q99567	AD	0.108071	0.0219599		0.0385411	0.0085043
ENSG00000244151_af	P04920	AD	0.108087	0.0219713		0.0170111	0.00371347
ENSG00000240505_af	O14836	AD	0.108317	0.0219828		0.446783	0.0930774
ENSG00000017373_af	Q9C0H9	AD	0.108381	0.0219943		0.126631	0.0267966
ENSG00000138172_af	Q9HA72	AD	0.108618	0.0220057		0.109675	0.0230372
ENSG00000132563_af	Q9BRK0	AD	0.108624	0.0220172		0.0090945	0.00195989
ENSG00000251143_af	Q14980	AD	0.108629	0.0220287		0.402847	0.083851
ENSG00000177994_af	Q8N5S3	AD	0.108641	0.0220401		0.728798	0.149077
ENSG00000162881_af	Q8TDS5	AD	0.108738	0.0220516		0.259303	0.0547163
ENSG00000204231_af	P28702	AD	0.1088	0.022063		0.472763	0.098384
ENSG00000135144_af	Q86Y01	AD	0.108832	0.0220745		0.022149	0.00505444
ENSG00000155850_af	P50443	AD	0.108927	0.022086		0.232758	0.0491691
ENSG00000196739_af	Q8IZC6	AD	0.109146	0.0220974		0.130877	0.027702
ENSG00000170777_af	Q96J77	AD	0.109167	0.0221089		0.0265012	0.00595989
ENSG00000254902_af	Q5XXA6	AD	0.109173	0.0221203		0.0642775	0.0138223
ENSG00000215529_af	A8MWE9	AD	0.109193	0.0221318		0.121157	0.0256275
ENSG00000066379_af	Q9P1U0	AD	0.109229	0.0221433		0.0489689	0.010808
ENSG00000109320_af	P19838	AD	0.109357	0.0221547		0.0581178	0.0126762
ENSG00000053770_af	Q9H0R1	AD	0.109371	0.0221662		0.0411534	0.00896275
ENSG00000223732_af	Q8IXQ4	AD	0.109472	0.0221777		0.202952	0.0430602
ENSG00000133114_af	Q8IXQ4	AD	0.109472	0.0221891		0.202945	0.0430487
ENSG00000166396_af	O75635	AD	0.109487	0.0222006		0.107825	0.0227507
ENSG00000167014_af	Q8NHR7	AD	0.109492	0.022212		0.0758648	0.0163209
ENSG00000132975_af	P47775	AD	0.109508	0.0222235		0.446155	0.0929398
ENSG00000183379_af	A6NDD5	AD	0.109533	0.022235		0.0695991	0.0150602
ENSG00000246316_af	Q9H2S1	AD	0.109554	0.0222464		0.195786	0.0416275
ENSG00000170638_af	Q9H4I3	AD	0.10957	0.0222579		0.20009	0.0425215
ENSG00000104299_af	Q9NV88	AD	0.109572	0.0222693		0.324014	0.0680802
ENSG00000112619_af	P23942	AD	0.10958	0.0222808		0.125263	0.02651
ENSG00000136696_af	Q9NZH7	AD	0.109641	0.0222923		0.242553	0.0510716
ENSG00000214556_af	A8MV24	AD	0.109663	0.0223037		0.274026	0.0576504
ENSG00000108270_af	Q9NY61	AD	0.10967	0.0223152		0.136834	0.0291461
ENSG00000147697_af	Q9BYG8	AD	0.109672	0.0223266		0.0506026	0.0112665
ENSG00000116991_af	Q9P2F8	AD	0.109673	0.0223381		0.0556217	0.0121719
ENSG00000146857_af	Q7Z7C7	AD	0.10968	0.0223496		0.163165	0.0347736
ENSG00000177108_af	Q8N966	AD	0.109805	0.022361		0.0174844	0.00374785
ENSG00000178795_af	Q6W3E5	AD	0.109808	0.0223725		0.196536	0.0417307
ENSG00000212657_af	A8MUX0	AD	0.109894	0.022384		0.0776559	0.0166189
ENSG00000048028_af	Q96RU2	AD	0.1099	0.0223954		0.177787	0.0379026
ENSG00000165807_af	Q96LQ0	AD	0.10996	0.0224069		0.054629	0.0120458
ENSG00000112530_af	Q96M98	AD	0.110029	0.0224183		0.400073	0.0832894
ENSG00000140025_af	Q9BUY7	AD	0.110064	0.0224298		0.122167	0.0258567
ENSG00000123307_af	Q9HD90	AD	0.110102	0.0224413		0.222468	0.0470487
ENSG00000217442_af	A1L190	AD	0.110192	0.0224527		0.372507	0.077788
ENSG00000087448_af	Q9P2K6	AD	0.110261	0.0224642		0.238553	0.050212
ENSG00000142549_af	A6NGN9	AD	0.110564	0.0224756		0.00211744	0.000469914
ENSG00000158050_af	Q05923	AD	0.110646	0.0224871		0.148425	0.0315874
ENSG00000100647_af	Q92537	AD	0.11068	0.0224986		0.381868	0.0797135
ENSG00000100351_af	O75791	AD	0.110788	0.02251		0.0457838	0.0100401
ENSG00000097046_af	O00311	AD	0.110807	0.0225215		0.203185	0.0431175
ENSG00000133424_af	O95461	AD	0.111092	0.022533		0.111411	0.0233811
ENSG00000232335_af	Q9HAW4	AD	0.111125	0.0225444		0.343361	0.0720802
ENSG00000101160_af	Q9UBR2	AD	0.111157	0.0225559		0.112925	0.0236676
ENSG00000154839_af	Q96BD8	AD	0.111161	0.0225673		0.0508692	0.0113009
ENSG00000170484_af	Q7RTS7	AD	0.111202	0.0225788		0.0398175	0.00873352
ENSG00000119227_af	Q86VD9	AD	0.111209	0.0225903		0.0258587	0.00582235
ENSG00000112818_af	Q16819	AD	0.111217	0.0226017		0.19555	0.0415473
ENSG00000119411_af	Q5W0U4	AD	0.111266	0.0226132		0.0386144	0.00851576
ENSG00000163728_af	Q96N46	AD	0.111286	0.0226246		0.247509	0.0520802
ENSG00000260234_af	P58418	AD	0.111287	0.0226361		0.143734	0.0307049
ENSG00000160994_af	Q8IYK2	AD	0.111313	0.0226476		0.105285	0.0222235
ENSG00000146701_af	P40926	AD	0.111333	0.022659		0.039319	0.00861891
ENSG00000167460_af	P67936	AD	0.111452	0.0226705		0.26408	0.0557822
ENSG00000007402_af	Q9NY47	AD	0.11147	0.0226819		0.0141276	0.00311748
ENSG00000099795_af	P17568	AD	0.11149	0.0226934		0.447595	0.093341
ENSG00000174871_af	O95070	AD	0.111516	0.0227049		0.180725	0.0385215
ENSG00000160401_af	Q5JU67	AD	0.111564	0.0227163		0.206413	0.043851
ENSG00000187024_af	Q5JU67	AD	0.111564	0.0227278		0.206413	0.0438625
ENSG00000150967_af	Q9NP78	AD	0.111615	0.0227393		0.152437	0.0325043
ENSG00000108786_af	P14061	AD	0.111634	0.0227507		0.0583101	0.0127221
ENSG00000033627_af	Q93050	AD	0.11172	0.0227622		0.62909	0.12902
ENSG00000133884_af	Q92785	AD	0.111725	0.0227736		0.00993704	0.00210888
ENSG00000173013_af	Q2M329	AD	0.111744	0.0227851		0.527858	0.109181
ENSG00000245748_af	Q2M329	AD	0.111744	0.0227966		0.527856	0.109169
ENSG00000136169_af	Q96T68	AD	0.111767	0.022808		0.773053	0.157983
ENSG00000167702_af	Q96AC6	AD	0.111827	0.0228195		0.227598	0.0482178
ENSG00000060709_af	O15034	AD	0.111856	0.0228309		0.238982	0.0503152
ENSG00000189325_af	P0C671	AD	0.111873	0.0228424		0.327787	0.0687564
ENSG00000132142_af	Q13085	AD	0.111877	0.0228539		0.433214	0.0901777
ENSG00000072952_af	Q9Y6F6	AD	0.111975	0.0228653		0.130984	0.0277135
ENSG00000132671_af	P31391	AD	0.112059	0.0228768		0.0178276	0.003851
ENSG00000140265_af	Q8IWY8	AD	0.112083	0.0228883		0.537893	0.111255
[truncated: 15,453 more rows]

## Sheet: Supplemental_ Table_ S4
Supplemental Table S4. Results for Model0, Model1, Model0-10PCs, and Model1-10PCs for four candidate genes (TREM2, SORL2, EXOC3L4, and TAS2R39) and a suggestive gene CSF1R in the ADSP WGS Replication and ADSP Validation datasets.
Model 0									Model 1
		ADSP WES Discovery		ADSP WGS		ADSP					ADSP WES Discovery		ADSP WGS		ADSP
		Overall: 10441		Replication		Validation					Overall: 10441		Replication		Validation
		Case/Control: 5522/4919		Overall: 7762		Overall: 15078					Case/Control: 5522/4919		Overall: 7762		Overall: 15078
				Case/Control: 3757/4005		Case/Control:							Case/Control: 3757/4005		Case/Control:
						8294/6784									8294/6784
Gene	Entry	#SNPs	p-value	#SNPs	p-value	#SNPs	p-value		Gene	Entry	#SNPs	p-value	#SNPs	p-value	#SNPs	p-value
		mapped		mapped		mapped					mapped		mapped		mapped
TREM2	PDB:6XDS	33	3.60455e-07	21	0.0302664	33	1.48403e-08		TREM2	PDB:6XDS	33	0.00417715	21	0.00232145	33	0.000349929
SORL1	PDB:3WSY	56	7.02203e-05	53	0.159505	82	0.00360935		SORL1	PDB:3WSY	56	0.000104279	53	0.435549	82	0.0269216
CSF1R	PDB:4LIQ	38	0.000520978	38	0.108084	46	0.00559441		CSF1R	PDB:4LIQ	38	0.0027926	38	0.229419	46	0.0641137
TREM2	AlphaFold: Q9NZC2	33	3.37075e-07	21	0.0119421	33	2.59405e-07		TREM2	AlphaFold: Q9NZC2	33	0.0068859	21	0.000785929	33	0.00135066
EXOC3L4	AlphaFold: Q17RC7	68	2.70692e-05	83	0.00510396	90	9.22061e-05		EXOC3L4	AlphaFold: Q17RC7	68	0.000369237	83	0.000524595	90	0.00503703
TAS2R39	AlphaFold: P59534	31	3.01219e-05	27	0.521634	37	0.0246784		TAS2R39	AlphaFold: P59534	31	0.000655689	27	0.157074	37	0.29019
Model 0-10PCs									Model 1-10PCs
		ADSP WES Discovery		ADSP WGS		ADSP					ADSP WES Discovery		ADSP WGS		ADSP
		Overall: 10441		Replication		Validation					Overall: 10441		Replication		Validation
		Case/Control: 5522/4919		Overall: 7762		Overall: 15078					Case/Control: 5522/4919		Overall: 7762		Overall: 15078
				Case/Control: 3757/4005		Case/Control:							Case/Control: 3757/4005		Case/Control:
						8294/6784									8294/6784
Gene	Entry	#SNPs	p-value	#SNPs	p-value	#SNPs	p-value		Gene	Entry	#SNPs	p-value	#SNPs	p-value	#SNPs	p-value
		mapped		mapped		mapped					mapped		mapped		mapped
TREM2	PDB:6XDS	33	3.59153e-07	21	0.0357149	33	1.58475e-08		TREM2	PDB:6XDS	33	0.00423354	21	0.00598855	33	0.000355809
SORL1	PDB:3WSY	56	7.4631e-05	53	0.164788	82	0.00367606		SORL1	PDB:3WSY	56	0.000106396	53	0.457829	82	0.0271844
CSF1R	PDB:4LIQ	38	0.000518609	38	0.131604	46	0.00588323		CSF1R	PDB:4LIQ	38	0.002809	38	0.281764	46	0.0668961
TREM2	AlphaFold: Q9NZC2	33	3.24466e-07	21	0.0143961	33	2.68885e-07		TREM2	AlphaFold: Q9NZC2	33	0.00693266	21	0.0022323	33	0.00135993
EXOC3L4	AlphaFold: Q17RC7	68	2.50433e-05	83	0.00646743	90	9.91008e-05		EXOC3L4	AlphaFold: Q17RC7	68	0.000353421	83	0.00185541	90	0.00542193
TAS2R39	AlphaFold: P59534	31	4.39371e-05	27	0.542364	37	0.0213376		TAS2R39	AlphaFold: P59534	31	0.000761467	27	0.205635	37	0.254966

## Sheet: Supplemental_ Table_ S5
Supplemental Table S5. The variant clusters were identified for TREM2 in the ADSP WES discovery, ADSP WGS Replication, and ADSP validation datasets.
ADSP WES Discovery										ADSP WGS Replication										ADSP Validation
Case cluster										Case cluster										Case cluster
grp	varcode	structure	chain	structure_position	x	y	z	aa		grp	varcode	structure	chain	structure_position	x	y	z	aa		grp	varcode	structure	chain	structure_position	x	y	z	aa
0	6:41126619:G:A_A	6xds	A	223	-21.12	-5.393	8.507	T/I		-1	6:41159063:G:C_C	6xds	A	162	-1.841	-17.708	14.694	S/R		0	6:41158881:G:A_A	6xds	A	223	-21.12	-5.393	8.507	T/I
0	6:41126642:A:C_C	6xds	A	215	-21.695	0.098	19.349	H/Q		0	6:41158768:G:A_A	6xds	A	230	-21.218	-13.148	25.821	T/M		0	6:41158904:A:C_C	6xds	A	215	-21.695	0.098	19.349	H/Q
0	6:41126655:A:G_G	6xds	A	211	-17.213	-0.499	23.267	L/P		-1	6:41159805:G:A_A	6xds	A	157	-6.099	-10.361	16.985	H/Y		0	6:41158917:A:G_G	6xds	A	211	-17.213	-0.499	23.267	L/P
0	6:41126665:G:C_C	6xds	A	208	-11.111	0.756	18.013	P/A		-1	6:41159823:C:T_T	6xds	A	151	-7.854	-3.901	18.719	E/K		0	6:41158927:G:C_C	6xds	A	208	-11.111	0.756	18.013	P/A
0	6:41126697:G:A_A	6xds	A	197	-2.029	-2.996	6.411	A/V		-1	6:41159867:C:T_T	6xds	A	136	-14.722	-2.492	2.845	R/Q		0	6:41158959:G:A_A	6xds	A	197	-2.029	-2.996	6.411	A/V
0	6:41126701:C:T_T	6xds	A	196	-1.421	-3.281	10.217	A/T		-1	6:41161350:G:T_T	6xds	A	102	-4.437	-31.177	40.964	P/T		0	6:41158963:C:T_T	6xds	A	196	-1.421	-3.281	10.217	A/T
0	6:41126801:G:C_C	6xds	A	162	-1.841	-17.708	14.694	S/R		-1	6:41161395:C:T_T	6xds	A	87	-18.502	-37.283	35.569	D/N		0	6:41159063:G:C_C	6xds	A	162	-1.841	-17.708	14.694	S/R
0	6:41127543:G:A_A	6xds	A	157	-6.099	-10.361	16.985	H/Y		0	6:41161457:G:A_A	6xds	A	66	-4.727	-17.136	34.499	T/M		0	6:41158768:G:A_A	6xds	A	230	-21.218	-13.148	25.821	T/M
0	6:41127561:C:T_T	6xds	A	151	-7.854	-3.901	18.719	E/K		0	6:41161469:C:T_T	6xds	A	62	-11.835	-15.922	34.776	R/H		0	6:41159805:G:A_A	6xds	A	157	-6.099	-10.361	16.985	H/Y
0	6:41127603:C:T_T	6xds	A	137	-14.278	-0.329	-0.294	D/N		0	6:41161470:G:A_A	6xds	A	62	-11.835	-15.922	34.776	R/C		0	6:41159823:C:T_T	6xds	A	151	-7.854	-3.901	18.719	E/K
0	6:41127605:C:T_T	6xds	A	136	-14.722	-2.492	2.845	R/Q		0	6:41161481:C:T_T	6xds	A	58	-14.203	-16.097	48.068	G/D		0	6:41159865:C:T_T	6xds	A	137	-14.278	-0.329	-0.294	D/N
0	6:41127606:G:A_A	6xds	A	136	-14.722	-2.492	2.845	R/W		0	6:41161514:C:T_T	6xds	A	47	-6.79	-10.856	42.577	R/H		0	6:41159867:C:T_T	6xds	A	136	-14.722	-2.492	2.845	R/Q
1	6:41129078:G:A_A	6xds	A	105	-10.997	-24.507	39.759	A/V		0	6:41161541:T:C_C	6xds	A	38	-19.003	-7.964	41.891	Y/C		0	6:41159868:G:A_A	6xds	A	136	-14.722	-2.492	2.845	R/W
1	6:41129105:G:T_T	6xds	A	96	-8.181	-26.792	31.476	T/K		0	6:41163069:C:T_T	6xds	A	5	-20.923	-17.011	56.523	R/Q		-1	6:41161350:G:T_T	6xds	A	102	-4.437	-31.177	40.964	P/T
-1	6:41129133:C:T_T	6xds	A	87	-18.502	-37.283	35.569	D/N												-1	6:41161395:C:T_T	6xds	A	87	-18.502	-37.283	35.569	D/N
1	6:41129195:G:A_A	6xds	A	66	-4.727	-17.136	34.499	T/M												0	6:41161457:G:A_A	6xds	A	66	-4.727	-17.136	34.499	T/M
1	6:41129207:C:T_T	6xds	A	62	-11.835	-15.922	34.776	R/H												0	6:41161469:C:T_T	6xds	A	62	-11.835	-15.922	34.776	R/H
1	6:41129208:G:A_A	6xds	A	62	-11.835	-15.922	34.776	R/C												0	6:41161470:G:A_A	6xds	A	62	-11.835	-15.922	34.776	R/C
1	6:41129252:C:T_T	6xds	A	47	-6.79	-10.856	42.577	R/H												0	6:41161514:C:T_T	6xds	A	47	-6.79	-10.856	42.577	R/H
1	6:41129253:G:A_A	6xds	A	47	-6.79	-10.856	42.577	R/C												0	6:41161515:G:A_A	6xds	A	47	-6.79	-10.856	42.577	R/C
1	6:41129277:C:T_T	6xds	A	39	-17.388	-7.11	38.523	D/N												0	6:41161539:C:T_T	6xds	A	39	-17.388	-7.11	38.523	D/N
-1	6:41129300:G:A_A	6xds	A	31	-29.756	-21.247	53.094	S/F												0	6:41161541:T:C_C	6xds	A	38	-19.003	-7.964	41.891	Y/C
-1	6:41129313:C:T_T	6xds	A	27	-28.761	-19.858	47.314	V/M												-1	6:41161562:G:A_A	6xds	A	31	-29.756	-21.247	53.094	S/F
1	6:41129345:G:A_A	6xds	A	16	-23.748	-12.622	32.885	S/F												-1	6:41161575:C:T_T	6xds	A	27	-28.761	-19.858	47.314	V/M
1	6:41129346:A:G_G	6xds	A	16	-23.748	-12.622	32.885	S/P												0	6:41161607:G:A_A	6xds	A	16	-23.748	-12.622	32.885	S/F
																				0	6:41161608:A:G_G	6xds	A	16	-23.748	-12.622	32.885	S/P
																				-1	6:41163069:C:T_T	6xds	A	5	-20.923	-17.011	56.523	R/Q
Control cluster										Control cluster										Control cluster
grp	varcode	structure	chain	structure_position	x	y	z	aa		grp	varcode	structure	chain	structure_position	x	y	z	aa		grp	varcode	structure	chain	structure_position	x	y	z	aa
-1	6:41126790:C:T_T	6xds	A	166	2.11	-17.917	15.153	G/E		-1	6:41158917:A:G_G	6xds	A	211	-17.213	-0.499	23.267	L/P		-1	6:41158983:G:A_A	6xds	A	189	4.68	-11.529	11.094	A/V
-1	6:41126506:G:A_A	6xds	A	230	-21.218	-13.148	25.821	T/M		-1	6:41158975:C:T_T	6xds	A	192	0.212	-8.916	12.118	A/T		-1	6:41159052:C:T_T	6xds	A	166	2.11	-17.917	15.153	G/E
-1	6:41127615:G:T_T	6xds	A	133	-10.167	-4.661	1.813	L/M		-1	6:41158983:G:A_A	6xds	A	189	4.68	-11.529	11.094	A/V		-1	6:41159877:G:T_T	6xds	A	133	-10.167	-4.661	1.813	L/M
-1	6:41129100:G:A_A	6xds	A	98	-5.705	-29.202	36.278	R/W		-1	6:41159868:G:A_A	6xds	A	136	-14.722	-2.492	2.845	R/W		-1	6:41161362:G:A_A	6xds	A	98	-5.705	-29.202	36.278	R/W
-1	6:41129188:G:C_C	6xds	A	68	-1.856	-21.742	36.803	N/K		-1	6:41161385:C:T_T	6xds	A	90	-16.493	-32.835	30.183	G/D		-1	6:41161385:C:T_T	6xds	A	90	-16.493	-32.835	30.183	G/D
-1	6:41129189:T:C_C	6xds	A	68	-1.856	-21.742	36.803	N/S		-1	6:41161537:G:C_C	6xds	A	39	-17.388	-7.11	38.523	D/E		-1	6:41161450:G:C_C	6xds	A	68	-1.856	-21.742	36.803	N/K
-1	6:41129264:T:C_C	6xds	A	43	-10.035	-8.179	38.529	H/R		-1	6:41161571:G:A_A	6xds	A	28	-29.604	-17.134	49.871	A/V		-1	6:41161537:G:C_C	6xds	A	39	-17.388	-7.11	38.523	D/E
-1	6:41129275:G:C_C	6xds	A	39	-17.388	-7.11	38.523	D/E

## Sheet: Supplemental_ Table_ S6
Supplemental Table S6. The variant clusters were identified for SORL1 in the ADSP WES discovery, ADSP WGS Replication, and ADSP Validation datasets.
ADSP WES Discovery										ADSP WGS Replication										ADSP Validation
Case cluster										Case cluster										Case cluster
grp	varcode	structure	chain	structure_position	x	y	z	aa		grp	varcode	structure	chain	structure_position	x	y	z	aa		grp	varcode	structure	chain	structure_position	x	y	z	aa
-1	11:121340744:T:C_C	3wsy	A	105	32.509	6.773	50.235	M/T		-1	11:121452465:A:G_G	3wsy	C	45	30.766	18.126	54.592	D/G		0	11:121452465:A:G_G	3wsy	C	45	30.766	18.126	54.592	D/G
-1	11:121340776:G:A_A	3wsy	A	116	29.676	-8.069	44.023	V/M		-1	11:121470035:T:C_C	3wsy	A	105	32.509	6.773	50.235	M/T		0	11:121470035:T:C_C	3wsy	A	105	32.509	6.773	50.235	M/T
-1	11:121340794:C:G_G	3wsy	A	122	38.163	7.233	53.105	R/G		-1	11:121470067:G:A_A	3wsy	A	116	29.676	-8.069	44.023	V/M		-1	11:121470067:G:A_A	3wsy	A	116	29.676	-8.069	44.023	V/M
-1	11:121348834:T:G_G	3wsy	A	137	32.833	-5.856	50.004	V/G		-1	11:121470104:C:T_T	3wsy	A	128	46.167	15.829	51.306	A/V		0	11:121470085:C:G_G	3wsy	A	122	38.163	7.233	53.105	R/G
0	11:121348842:G:A_A	3wsy	A	140	24.982	-11.03	47.783	D/N		-1	11:121478187:A:C_C	3wsy	A	158	54.036	-5.137	60.299	N/H		0	11:121470104:C:T_T	3wsy	A	128	46.167	15.829	51.306	A/V
-1	11:121358750:G:C_C	3wsy	A	180	47.003	1.73	46.803	A/P		-1	11:121478199:G:A_A	3wsy	A	162	47.644	0.617	56.078	A/T		-1	11:121478125:T:G_G	3wsy	A	137	32.833	-5.856	50.004	V/G
-1	11:121358868:T:C_C	3wsy	A	219	48.661	-0.901	33.373	L/P		-1	11:121488075:T:C_C	3wsy	A	191	41.881	-11.711	40.96	F/S		5	11:121478133:G:A_A	3wsy	A	140	24.982	-11.03	47.783	D/N
-1	11:121360768:A:G_G	3wsy	A	236	51.776	-8.411	35.424	D/G		-1	11:121496907:T:C_C	3wsy	A	266	52.037	11.645	26.65	I/T		0	11:121478199:G:A_A	3wsy	A	162	47.644	0.617	56.078	A/T
-1	11:121367604:A:G_G	3wsy	A	262	50.098	-0.581	23.432	N/S		-1	11:121496913:G:A_A	3wsy	A	268	56.105	15.808	28.361	R/Q		1	11:121488159:T:C_C	3wsy	A	219	48.661	-0.901	33.373	L/P
-1	11:121367627:G:A_A	3wsy	A	270	59.477	21.422	28.283	E/K		-1	11:121496969:C:G_G	3wsy	A	287	63.307	5.869	18.961	R/G		-1	11:121490059:A:G_G	3wsy	A	236	51.776	-8.411	35.424	D/G
-1	11:121367726:C:T_T	3wsy	A	303	38.671	11.727	22.369	R/W		-1	11:121497017:C:T_T	3wsy	A	303	38.671	11.727	22.369	R/W		1	11:121496895:A:G_G	3wsy	A	262	50.098	-0.581	23.432	N/S
-1	11:121384931:A:C_C	3wsy	A	371	30.444	31.14	23.147	N/T		-1	11:121514222:A:C_C	3wsy	A	371	30.444	31.14	23.147	N/T		1	11:121496907:T:C_C	3wsy	A	266	52.037	11.645	26.65	I/T
-1	11:121384991:A:G_G	3wsy	A	391	31.212	28.509	31.913	Y/C		-1	11:121514282:A:G_G	3wsy	A	391	31.212	28.509	31.913	Y/C		1	11:121496913:G:A_A	3wsy	A	268	56.105	15.808	28.361	R/Q
-1	11:121385011:G:A_A	3wsy	A	398	33.955	32.338	37.657	G/S		-1	11:121520674:C:T_T	3wsy	A	410	37.196	24.162	33.613	P/L		1	11:121496918:G:A_A	3wsy	A	270	59.477	21.422	28.283	E/K
-1	11:121391383:C:T_T	3wsy	A	410	37.196	24.162	33.613	P/L		-1	11:121520821:C:A_A	3wsy	A	459	1.513	21.633	38.378	T/K		1	11:121496954:G:A_A	3wsy	A	282	56.722	0.091	22.387	D/N
-1	11:121391400:C:G_G	3wsy	A	416	24.348	15.845	26.096	R/G		-1	11:121522599:G:A_A	3wsy	A	473	8.785	32.662	30.647	C/Y		1	11:121496969:C:G_G	3wsy	A	287	63.307	5.869	18.961	R/G
-1	11:121391401:G:T_T	3wsy	A	416	24.348	15.845	26.096	R/L		-1	11:121522677:C:T_T	3wsy	A	499	19.184	2.893	29.324	S/L		-1	11:121497017:C:T_T	3wsy	A	303	38.671	11.727	22.369	R/W
-1	11:121391550:A:G_G	3wsy	A	466	0.707	30.473	33.719	N/D		-1	11:121522929:G:T_T	3wsy	A	512	11.964	34.32	33.668	K/N		2	11:121514222:A:C_C	3wsy	A	371	30.444	31.14	23.147	N/T
-1	11:121393359:G:A_A	3wsy	A	490	23.91	17.591	46.982	R/Q		-1	11:121522940:G:A_A	3wsy	A	516	12.579	30.589	41.628	S/N		2	11:121514282:A:G_G	3wsy	A	391	31.212	28.509	31.913	Y/C
-1	11:121393370:A:T_T	3wsy	A	494	20.307	16.645	34.696	I/F		-1	11:121532545:G:A_A	3wsy	A	560	9.936	7.926	52.28	E/K		2	11:121514302:G:A_A	3wsy	A	398	33.955	32.338	37.657	G/S
-1	11:121393684:G:A_A	3wsy	A	528	10.299	18.651	23.758	A/T		-1	11:121543585:A:T_T	3wsy	A	575	8.461	3.639	53.924	I/F		2	11:121520673:C:A_A	3wsy	A	410	37.196	24.162	33.613	P/T
-1	11:121403213:G:T_T	3wsy	A	546	13.612	3.65	32.474	G/V		-1	11:121545246:T:C_C	3wsy	A	623	4.514	-8.539	35.478	V/A		2	11:121520674:C:T_T	3wsy	A	410	37.196	24.162	33.613	P/L
0	11:121403242:A:G_G	3wsy	A	556	15.795	16.809	56.022	M/V		-1	11:121545249:C:T_T	3wsy	A	624	6.522	-8.929	32.29	P/L		-1	11:121520691:C:G_G	3wsy	A	416	24.348	15.845	26.096	R/G
0	11:121403248:A:T_T	3wsy	A	558	13.167	10.914	55.822	T/S		-1	11:121545284:T:A_A	3wsy	A	636	12.383	13.092	14.635	S/T		3	11:121520821:C:A_A	3wsy	A	459	1.513	21.633	38.378	T/K
0	11:121403254:G:A_A	3wsy	A	560	9.936	7.926	52.28	E/K		-1	11:121545339:G:A_A	3wsy	A	654	7.533	0.852	26.619	R/Q		3	11:121520841:A:G_G	3wsy	A	466	0.707	30.473	33.719	N/D
0	11:121414293:C:G_G	3wsy	A	574	7.16	3.52	50.327	F/L		-1	11:121545413:C:T_T	3wsy	A	679	16.648	20.898	1.059	R/W		3	11:121520845:G:A_A	3wsy	A	467	3.782	30.578	31.575	C/Y
0	11:121414300:T:C_C	3wsy	A	577	12.845	2.205	57.411	S/P		-1	11:121550082:C:T_T	3wsy	A	725	28.028	20.423	-9.737	T/M		3	11:121522599:G:A_A	3wsy	A	473	8.785	32.662	30.647	C/Y
0	11:121414334:C:T_T	3wsy	A	588	21.261	1.762	40.891	T/I		-1	11:121550589:C:T_T	3wsy	A	729	26.517	19.855	-2.384	R/W		0	11:121522650:G:A_A	3wsy	A	490	23.91	17.591	46.982	R/Q
-1	11:121414390:G:T_T	3wsy	A	607	26.144	11.815	64.506	V/F		-1	11:121550590:G:A_A	3wsy	A	729	26.517	19.855	-2.384	R/Q		-1	11:121522661:A:T_T	3wsy	A	494	20.307	16.645	34.696	I/F
0	11:121414415:T:G_G	3wsy	A	615	15.566	-2.291	47.982	V/G												4	11:121522677:C:T_T	3wsy	A	499	19.184	2.893	29.324	S/L
-1	11:121415955:T:C_C	3wsy	A	623	4.514	-8.539	35.478	V/A												3	11:121522929:G:T_T	3wsy	A	512	11.964	34.32	33.668	K/N
1	11:121416012:A:C_C	3wsy	A	642	13.037	16.054	10.351	E/A												3	11:121522940:G:A_A	3wsy	A	516	12.579	30.589	41.628	S/N
-1	11:121416045:G:A_A	3wsy	A	653	10.137	2.042	24.174	R/Q												6	11:121522975:G:A_A	3wsy	A	528	10.299	18.651	23.758	A/T
-1	11:121416093:C:T_T	3wsy	A	669	15.647	-2.749	19.607	P/L												4	11:121532504:G:T_T	3wsy	A	546	13.612	3.65	32.474	G/V
-1	11:121416096:T:C_C	3wsy	A	670	17.247	0.274	17.961	V/A												5	11:121532533:A:G_G	3wsy	A	556	15.795	16.809	56.022	M/V
1	11:121416122:C:T_T	3wsy	A	679	16.648	20.898	1.059	R/W												5	11:121532539:A:T_T	3wsy	A	558	13.167	10.914	55.822	T/S
1	11:121420682:A:C_C	3wsy	A	689	25.882	31.713	-2.795	K/Q												5	11:121532545:G:A_A	3wsy	A	560	9.936	7.926	52.28	E/K
1	11:121420782:A:G_G	3wsy	A	722	32.356	12.859	-14.004	Y/C												5	11:121543584:C:G_G	3wsy	A	574	7.16	3.52	50.327	F/L
1	11:121420791:C:A_A	3wsy	A	725	28.028	20.423	-9.737	T/K												5	11:121543585:A:T_T	3wsy	A	575	8.461	3.639	53.924	I/F
1	11:121421299:G:A_A	3wsy	A	729	26.517	19.855	-2.384	R/Q												5	11:121543591:T:C_C	3wsy	A	577	12.845	2.205	57.411	S/P
1	11:121421313:G:A_A	3wsy	A	734	25.155	13.764	5.766	D/N												0	11:121543681:G:T_T	3wsy	A	607	26.144	11.815	64.506	V/F
1	11:121421325:G:C_C	3wsy	A	738	16.5	8.937	-2.097	G/R												5	11:121543706:T:G_G	3wsy	A	615	15.566	-2.291	47.982	V/G
1	11:121421341:C:T_T	3wsy	A	743	16.847	13.708	-8.004	A/V												4	11:121545246:T:C_C	3wsy	A	623	4.514	-8.539	35.478	V/A
1	11:121421361:G:A_A	3wsy	A	750	29.398	14.706	-17.973	V/I												6	11:121545284:T:A_A	3wsy	A	636	12.383	13.092	14.635	S/T
																				6	11:121545303:A:C_C	3wsy	A	642	13.037	16.054	10.351	E/A
																				4	11:121545336:G:A_A	3wsy	A	653	10.137	2.042	24.174	R/Q
																				4	11:121545339:G:A_A	3wsy	A	654	7.533	0.852	26.619	R/Q
																				4	11:121545384:C:T_T	3wsy	A	669	15.647	-2.749	19.607	P/L
																				4	11:121545387:T:C_C	3wsy	A	670	17.247	0.274	17.961	V/A
																				6	11:121545413:C:T_T	3wsy	A	679	16.648	20.898	1.059	R/W
																				-1	11:121550073:A:G_G	3wsy	A	722	32.356	12.859	-14.004	Y/C
																				6	11:121550589:C:T_T	3wsy	A	729	26.517	19.855	-2.384	R/W
																				6	11:121550590:G:A_A	3wsy	A	729	26.517	19.855	-2.384	R/Q
																				6	11:121550604:G:A_A	3wsy	A	734	25.155	13.764	5.766	D/N
																				6	11:121550616:G:C_C	3wsy	A	738	16.5	8.937	-2.097	G/R
																				6	11:121550632:C:T_T	3wsy	A	743	16.847	13.708	-8.004	A/V
																				-1	11:121550652:G:A_A	3wsy	A	750	29.398	14.706	-17.973	V/I
Control cluster										Control cluster										Control cluster
grp	varcode	structure	chain	structure_position	x	y	z	aa		grp	varcode	structure	chain	structure_position	x	y	z	aa		grp	varcode	structure	chain	structure_position	x	y	z	aa
-1	11:121340782:G:A_A	3wsy	A	118	33.017	-2.882	46.574	V/M		-1	11:121452467:C:G_G	3wsy	C	46	29.948	14.547	55.594	R/G		-1	11:121452468:G:C_C	3wsy	C	46	29.948	14.547	55.594	R/P
-1	11:121358784:T:C_C	3wsy	A	191	41.881	-11.711	40.96	F/S		-1	11:121452468:G:C_C	3wsy	C	46	29.948	14.547	55.594	R/P		-1	11:121470073:G:A_A	3wsy	A	118	33.017	-2.882	46.574	V/M
-1	11:121358883:G:C_C	3wsy	A	224	53.274	13.113	40.503	R/T		-1	11:121478133:G:A_A	3wsy	A	140	24.982	-11.03	47.783	D/N		-1	11:121478191:G:A_A	3wsy	A	159	52.331	-3.112	62.979	R/K
-1	11:121360759:A:G_G	3wsy	A	233	54.515	0.359	33.358	K/R		-1	11:121478191:G:A_A	3wsy	A	159	52.331	-3.112	62.979	R/K		-1	11:121478230:C:T_T	3wsy	A	172	38.857	-5.947	31.038	A/V
-1	11:121367639:T:C_C	3wsy	A	274	54.734	24.275	27.451	Y/H		-1	11:121478230:C:T_T	3wsy	A	172	38.857	-5.947	31.038	A/V		-1	11:121488041:G:C_C	3wsy	A	180	47.003	1.73	46.803	A/P
-1	11:121383742:G:C_C	3wsy	A	324	46.05	31.113	21.361	V/L		-1	11:121488058:G:T_T	3wsy	A	185	55.094	2.575	48.257	Q/H		-1	11:121488058:G:T_T	3wsy	A	185	55.094	2.575	48.257	Q/H
-1	11:121383803:A:C_C	3wsy	A	344	37.802	39.162	19.852	H/P		-1	11:121490053:C:T_T	3wsy	A	234	53.612	-2.996	34.844	S/L		-1	11:121488075:T:C_C	3wsy	A	191	41.881	-11.711	40.96	F/S
-1	11:121384918:A:G_G	3wsy	A	367	36.409	39.459	28.589	N/D		-1	11:121490056:A:T_T	3wsy	A	235	53.081	-6.066	32.824	D/V		-1	11:121490050:A:G_G	3wsy	A	233	54.515	0.359	33.358	K/R
-1	11:121384984:G:A_A	3wsy	A	389	27.174	29.827	27.609	V/M		-1	11:121490098:A:G_G	3wsy	A	249	52.705	16.141	32.4	K/R		-1	11:121490053:C:T_T	3wsy	A	234	53.612	-2.996	34.844	S/L
-1	11:121414386:G:C_C	3wsy	A	605	19.873	9.911	66.585	E/D		-1	11:121496876:G:A_A	3wsy	A	256	40.807	1.008	19.736	D/N		-1	11:121490056:A:T_T	3wsy	A	235	53.081	-6.066	32.824	D/V
-1	11:121415993:T:A_A	3wsy	A	636	12.383	13.092	14.635	S/T		-1	11:121496918:G:A_A	3wsy	A	270	59.477	21.422	28.283	E/K		-1	11:121490098:A:G_G	3wsy	A	249	52.705	16.141	32.4	K/R
-1	11:121421364:C:T_T	3wsy	A	751	31.033	11.48	-19.293	P/S		-1	11:121496946:G:T_T	3wsy	A	279	52.972	8.715	20.851	R/L		-1	11:121496876:G:A_A	3wsy	A	256	40.807	1.008	19.736	D/N
										-1	11:121496954:G:A_A	3wsy	A	282	56.722	0.091	22.387	D/N		-1	11:121496930:T:C_C	3wsy	A	274	54.734	24.275	27.451	Y/H
										-1	11:121514213:A:G_G	3wsy	A	368	34.987	36.382	30.345	N/S		-1	11:121513033:G:C_C	3wsy	A	324	46.05	31.113	21.361	V/L
										-1	11:121514221:A:G_G	3wsy	A	371	30.444	31.14	23.147	N/D		-1	11:121513094:A:C_C	3wsy	A	344	37.802	39.162	19.852	H/P
										-1	11:121520692:G:A_A	3wsy	A	416	24.348	15.845	26.096	R/Q		-1	11:121514209:A:G_G	3wsy	A	367	36.409	39.459	28.589	N/D
										-1	11:121522649:C:T_T	3wsy	A	490	23.91	17.591	46.982	R/W		-1	11:121514213:A:G_G	3wsy	A	368	34.987	36.382	30.345	N/S
										-1	11:121522928:A:G_G	3wsy	A	512	11.964	34.32	33.668	K/R		-1	11:121520692:G:A_A	3wsy	A	416	24.348	15.845	26.096	R/Q
										-1	11:121522951:G:A_A	3wsy	A	520	11.728	18.039	39.642	V/M		-1	11:121522649:C:T_T	3wsy	A	490	23.91	17.591	46.982	R/W
										-1	11:121532527:C:G_G	3wsy	A	554	16.428	16.399	49.955	Q/E		-1	11:121522928:A:G_G	3wsy	A	512	11.964	34.32	33.668	K/R
										-1	11:121532543:A:G_G	3wsy	A	559	12.027	7.348	55.364	N/S		-1	11:121522951:G:A_A	3wsy	A	520	11.728	18.039	39.642	V/M
										-1	11:121549973:A:C_C	3wsy	A	689	25.882	31.713	-2.795	K/Q		-1	11:121532543:A:G_G	3wsy	A	559	12.027	7.348	55.364	N/S
										-1	11:121550604:G:A_A	3wsy	A	734	25.155	13.764	5.766	D/N		-1	11:121543677:G:C_C	3wsy	A	605	19.873	9.911	66.585	E/D
										-1	11:121550652:G:A_A	3wsy	A	750	29.398	14.706	-17.973	V/I		-1	11:121549973:A:C_C	3wsy	A	689	25.882	31.713	-2.795	K/Q
																				-1	11:121550655:C:T_T	3wsy	A	751	31.033	11.48	-19.293	P/S

## Sheet: Supplemental_ Table_ S7
Supplemental Table S7. The variant clusters were identified for EXOC3L4 in the ADSP WES discovery, ADSP WGS Replication, and ADSP Validation datasets.
ADSP WES Discovery(10k)										ADSP WGS Replication(17k)										ADSP Validation
Case cluster										Case cluster										Case cluster
grp	varcode	structure	chain	structure_position	x	y	z	aa		grp	varcode	structure	chain	structure_position	x	y	z	aa		grp	varcode	structure	chain	structure_position	x	y	z	aa
-1	14:103566578:A:T_T	Q17RC7	A	8	4.482	-43.351	-8.269	T/S		-1	14:103100241:A:C_C	Q17RC7	A	8	4.482	-43.351	-8.269	T/P		-1	14:103100383:A:G_G	Q17RC7	A	55	-14.18	13.015	16.641	Q/R
-1	14:103566720:A:G_G	Q17RC7	A	55	-14.18	13.015	16.641	Q/R		-1	14:103100407:G:A_A	Q17RC7	A	63	-21.976	17.378	24.131	R/Q		-1	14:103100407:G:A_A	Q17RC7	A	63	-21.976	17.378	24.131	R/Q
-1	14:103566770:G:C_C	Q17RC7	A	72	-26.924	28.593	12.773	D/H		-1	14:103100478:T:C_C	Q17RC7	A	87	-4.224	18.543	2.302	F/L		-1	14:103100433:G:C_C	Q17RC7	A	72	-26.924	28.593	12.773	D/H
-1	14:103566818:C:T_T	Q17RC7	A	88	-1.681	20.063	-0.16	R/W		1	14:103102316:G:T_T	Q17RC7	A	198	-40.35	-0.116	34.19	R/L		-1	14:103100437:C:T_T	Q17RC7	A	73	-28.019	27.042	9.456	T/M
-1	14:103566834:A:C_C	Q17RC7	A	93	1.507	26.409	5.434	D/A		0	14:103102381:G:A_A	Q17RC7	A	220	-42.468	-16.089	48.243	A/T		-1	14:103100478:T:C_C	Q17RC7	A	87	-4.224	18.543	2.302	F/L
-1	14:103566879:C:T_T	Q17RC7	A	108	-14.013	26.839	47.952	S/L		0	14:103102405:C:A_A	Q17RC7	A	228	-48.167	-27.182	38.994	P/T		-1	14:103100481:C:T_T	Q17RC7	A	88	-1.681	20.063	-0.16	R/W
-1	14:103566924:C:T_T	Q17RC7	A	123	-40.1	5.389	76.428	A/V		0	14:103102413:C:A_A	Q17RC7	A	230	-51.387	-32.753	39.711	D/E		-1	14:103100542:C:T_T	Q17RC7	A	108	-14.013	26.839	47.952	S/L
-1	14:103568470:C:T_T	Q17RC7	A	137	-56.05	-3.639	46.463	A/V		0	14:103102424:T:G_G	Q17RC7	A	234	-56.075	-23.216	38.569	F/C		-1	14:103100587:C:T_T	Q17RC7	A	123	-40.1	5.389	76.428	A/V
-1	14:103568488:G:A_A	Q17RC7	A	143	-46.364	-1.249	47.013	R/Q		0	14:103102435:C:T_T	Q17RC7	A	238	-47.508	-21.354	39.67	P/S		-1	14:103102133:C:T_T	Q17RC7	A	137	-56.05	-3.639	46.463	A/V
-1	14:103568587:C:T_T	Q17RC7	A	176	-66.677	-18.42	41.125	A/V		1	14:103102471:C:T_T	Q17RC7	A	250	-36.602	-7.412	28.737	R/W		0	14:103102151:G:A_A	Q17RC7	A	143	-46.364	-1.249	47.013	R/Q
-1	14:103568593:G:A_A	Q17RC7	A	178	-64.393	-14.932	44.909	R/H		-1	14:103102504:G:C_C	Q17RC7	A	261	-34.374	7.57	16.835	G/R		-1	14:103102250:C:T_T	Q17RC7	A	176	-66.677	-18.42	41.125	A/V
-1	14:103568655:G:C_C	Q17RC7	A	199	-39.874	2.814	36.626	E/Q		1	14:103102588:G:A_A	Q17RC7	A	289	-28.819	2.531	32.474	D/N		-1	14:103102256:G:A_A	Q17RC7	A	178	-64.393	-14.932	44.909	R/H
-1	14:103568718:G:A_A	Q17RC7	A	220	-42.468	-16.089	48.243	A/T		1	14:103102619:C:T_T	Q17RC7	A	299	-27.459	-4.325	45.682	P/L		0	14:103102316:G:T_T	Q17RC7	A	198	-40.35	-0.116	34.19	R/L
-1	14:103568937:G:A_A	Q17RC7	A	293	-28.365	-1.222	37.423	V/M		1	14:103102654:G:A_A	Q17RC7	A	311	-30.669	-10.414	33.498	V/I		0	14:103102318:G:C_C	Q17RC7	A	199	-39.874	2.814	36.626	E/Q
-1	14:103569028:G:A_A	Q17RC7	A	323	-31.878	-2.599	17.065	R/H		1	14:103102664:G:A_A	Q17RC7	A	314	-28.589	-9.877	28.647	R/H		-1	14:103102381:G:A_A	Q17RC7	A	220	-42.468	-16.089	48.243	A/T
-1	14:103570354:G:T_T	Q17RC7	A	376	-20.802	-11.294	6.254	A/S		2	14:103102727:A:G_G	Q17RC7	A	335	-19.988	5.42	5.462	E/G		-1	14:103102405:C:A_A	Q17RC7	A	228	-48.167	-27.182	38.994	P/T
-1	14:103570385:T:C_C	Q17RC7	A	386	-15.608	0.485	-1.442	L/P		2	14:103102739:T:G_G	Q17RC7	A	339	-20.204	3.151	11.144	I/S		-1	14:103102413:C:A_A	Q17RC7	A	230	-51.387	-32.753	39.711	D/E
-1	14:103571151:G:A_A	Q17RC7	A	454	-6.46	-4.283	-8.459	R/Q		2	14:103104041:A:G_G	Q17RC7	A	384	-18.652	-3.718	-3.05	S/G		0	14:103102471:C:T_T	Q17RC7	A	250	-36.602	-7.412	28.737	R/W
-1	14:103573181:C:T_T	Q17RC7	A	509	5.144	-1.809	-18.43	T/M		2	14:103104048:T:C_C	Q17RC7	A	386	-15.608	0.485	-1.442	L/P		-1	14:103102504:G:C_C	Q17RC7	A	261	-34.374	7.57	16.835	G/R
-1	14:103573842:G:A_A	Q17RC7	A	555	22.037	13.234	-18.555	A/T		2	14:103104283:G:A_A	Q17RC7	A	393	-11.057	8.136	-6.576	C/Y		0	14:103102600:G:A_A	Q17RC7	A	293	-28.365	-1.222	37.423	V/M
-1	14:103573870:C:T_T	Q17RC7	A	564	18.563	1.744	-11.627	P/L		-1	14:103104364:C:A_A	Q17RC7	A	420	4.724	14.382	-9.468	A/E		0	14:103102612:G:A_A	Q17RC7	A	297	-30.524	-2.336	41.379	V/M
-1	14:103574001:C:T_T	Q17RC7	A	579	25.602	2.455	-32.942	R/C		-1	14:103106844:C:T_T	Q17RC7	A	509	5.144	-1.809	-18.43	T/M		0	14:103102664:G:A_A	Q17RC7	A	314	-28.589	-9.877	28.647	R/H
0	14:103574007:T:C_C	Q17RC7	A	581	28.197	6.621	-35.411	Y/H		-1	14:103107520:C:T_T	Q17RC7	A	560	16.815	13.441	-11.23	R/C		1	14:103102727:A:G_G	Q17RC7	A	335	-19.988	5.42	5.462	E/G
-1	14:103574038:G:A_A	Q17RC7	A	591	35.704	7.409	-49.705	R/Q		3	14:103107658:G:A_A	Q17RC7	A	577	25.475	7.134	-29.986	V/M		1	14:103102739:T:G_G	Q17RC7	A	339	-20.204	3.151	11.144	I/S
0	14:103574095:C:T_T	Q17RC7	A	610	35.686	12.239	-26.746	A/V		3	14:103107670:T:C_C	Q17RC7	A	581	28.197	6.621	-35.411	Y/H		-1	14:103104017:G:T_T	Q17RC7	A	376	-20.802	-11.294	6.254	A/S
0	14:103574776:C:T_T	Q17RC7	A	633	39.642	3.788	-36.746	A/V		3	14:103107679:C:T_T	Q17RC7	A	584	27.172	6.093	-40.721	R/W		1	14:103104041:A:G_G	Q17RC7	A	384	-18.652	-3.718	-3.05	S/G
0	14:103574815:G:A_A	Q17RC7	A	646	45.221	-8.434	-36.096	R/Q		3	14:103107683:C:T_T	Q17RC7	A	585	30.883	5.168	-40.82	A/V		1	14:103104048:T:C_C	Q17RC7	A	386	-15.608	0.485	-1.442	L/P
0	14:103576400:G:A_A	Q17RC7	A	670	40.357	0.508	-46.88	R/H		3	14:103107764:G:A_A	Q17RC7	A	612	34.202	7.587	-24.209	S/N		1	14:103104283:G:A_A	Q17RC7	A	393	-11.057	8.136	-6.576	C/Y
										3	14:103108417:G:A_A	Q17RC7	A	626	34.474	2.487	-25.835	D/N		-1	14:103104364:C:A_A	Q17RC7	A	420	4.724	14.382	-9.468	A/E
										3	14:103108435:G:A_A	Q17RC7	A	632	37.336	0.707	-36.879	V/M		-1	14:103105020:G:C_C	Q17RC7	A	472	2.673	17.929	-21.491	A/P
										3	14:103108453:G:A_A	Q17RC7	A	638	46.716	1.066	-40.488	E/K		-1	14:103106844:C:T_T	Q17RC7	A	509	5.144	-1.809	-18.43	T/M
										3	14:103108495:A:G_G	Q17RC7	A	652	35.59	-9.93	-33.629	I/V		2	14:103107505:G:A_A	Q17RC7	A	555	22.037	13.234	-18.555	A/T
										3	14:103108510:G:A_A	Q17RC7	A	657	27.479	-10.082	-32.657	D/N		-1	14:103107520:C:T_T	Q17RC7	A	560	16.815	13.441	-11.23	R/C
										3	14:103110048:C:A_A	Q17RC7	A	665	31.794	-2.739	-44.958	A/D		-1	14:103107533:C:T_T	Q17RC7	A	564	18.563	1.744	-11.627	P/L
										3	14:103110054:T:C_C	Q17RC7	A	667	37.229	-3.594	-45.505	L/P		2	14:103107658:G:A_A	Q17RC7	A	577	25.475	7.134	-29.986	V/M
										3	14:103110063:G:A_A	Q17RC7	A	670	40.357	0.508	-46.88	R/H		2	14:103107664:C:T_T	Q17RC7	A	579	25.602	2.455	-32.942	R/C
										3	14:103110080:C:T_T	Q17RC7	A	676	43.771	-9.298	-49.99	R/W		2	14:103107670:T:C_C	Q17RC7	A	581	28.197	6.621	-35.411	Y/H
										3	14:103110189:C:T_T	Q17RC7	A	712	23.741	-2.667	-47.426	P/L		2	14:103107701:G:A_A	Q17RC7	A	591	35.704	7.409	-49.705	R/Q
										3	14:103110194:G:A_A	Q17RC7	A	714	25.507	-4.246	-52.082	A/T		2	14:103107758:C:T_T	Q17RC7	A	610	35.686	12.239	-26.746	A/V
																				2	14:103107764:G:A_A	Q17RC7	A	612	34.202	7.587	-24.209	S/N
																				2	14:103108417:G:A_A	Q17RC7	A	626	34.474	2.487	-25.835	D/N
																				2	14:103108439:C:T_T	Q17RC7	A	633	39.642	3.788	-36.746	A/V
																				2	14:103108478:G:A_A	Q17RC7	A	646	45.221	-8.434	-36.096	R/Q
																				2	14:103108510:G:A_A	Q17RC7	A	657	27.479	-10.082	-32.657	D/N
																				2	14:103110048:C:A_A	Q17RC7	A	665	31.794	-2.739	-44.958	A/D
																				2	14:103110054:T:C_C	Q17RC7	A	667	37.229	-3.594	-45.505	L/P
																				2	14:103110063:G:A_A	Q17RC7	A	670	40.357	0.508	-46.88	R/H
																				2	14:103110194:G:A_A	Q17RC7	A	714	25.507	-4.246	-52.082	A/T
Control cluster										Control cluster										Control cluster
grp	varcode	structure	chain	structure_position	x	y	z	aa		grp	varcode	structure	chain	structure_position	x	y	z	aa		grp	varcode	structure	chain	structure_position	x	y	z	aa
-1	14:103566644:C:T_T	Q17RC7	A	30	36.537	3.231	24.04	R/W		-1	14:103100227:C:T_T	Q17RC7	A	3	-11.298	-44.493	-3.786	S/L		-1	14:103100251:C:T_T	Q17RC7	A	11	14.509	-40.925	-6.437	P/L
-1	14:103566710:T:G_G	Q17RC7	A	52	-14.047	13.404	11.706	S/A		-1	14:103100251:C:T_T	Q17RC7	A	11	14.509	-40.925	-6.437	P/L		-1	14:103100307:C:T_T	Q17RC7	A	30	36.537	3.231	24.04	R/W
-1	14:103566732:G:A_A	Q17RC7	A	59	-17.746	15.315	20.591	R/Q		-1	14:103100307:C:T_T	Q17RC7	A	30	36.537	3.231	24.04	R/W		-1	14:103100373:T:G_G	Q17RC7	A	52	-14.047	13.404	11.706	S/A
-1	14:103566774:C:T_T	Q17RC7	A	73	-28.019	27.042	9.456	T/M		-1	14:103100343:C:T_T	Q17RC7	A	42	1.088	17.03	25.644	R/C		-1	14:103100395:G:A_A	Q17RC7	A	59	-17.746	15.315	20.591	R/Q
-1	14:103566786:G:A_A	Q17RC7	A	77	-22.994	19.531	-0.048	R/Q		-1	14:103100437:C:T_T	Q17RC7	A	73	-28.019	27.042	9.456	T/M		-1	14:103100449:G:A_A	Q17RC7	A	77	-22.994	19.531	-0.048	R/Q
-1	14:103566810:G:A_A	Q17RC7	A	85	-6.786	20.266	-2.322	R/Q		-1	14:103100449:G:A_A	Q17RC7	A	77	-22.994	19.531	-0.048	R/Q		-1	14:103100473:G:A_A	Q17RC7	A	85	-6.786	20.266	-2.322	R/Q
-1	14:103566853:T:G_G	Q17RC7	A	99	0.806	33.138	21.963	H/Q		-1	14:103100515:A:T_T	Q17RC7	A	99	0.806	33.138	21.963	H/L		-1	14:103100515:A:T_T	Q17RC7	A	99	0.806	33.138	21.963	H/L
-1	14:103568581:C:A_A	Q17RC7	A	174	-70.306	-16.889	44.923	A/D		-1	14:103100516:T:G_G	Q17RC7	A	99	0.806	33.138	21.963	H/Q		-1	14:103100516:T:G_G	Q17RC7	A	99	0.806	33.138	21.963	H/Q
-1	14:103568619:G:A_A	Q17RC7	A	187	-52.967	-10.043	38.052	D/N		-1	14:103100592:G:A_A	Q17RC7	A	125	-43.57	1.366	73.2	E/K		-1	14:103102244:C:A_A	Q17RC7	A	174	-70.306	-16.889	44.923	A/D
0	14:103568656:A:G_G	Q17RC7	A	199	-39.874	2.814	36.626	E/G		0	14:103102151:G:A_A	Q17RC7	A	143	-46.364	-1.249	47.013	R/Q		-1	14:103102270:T:C_C	Q17RC7	A	183	-57.18	-14.066	40.208	C/R
0	14:103568949:G:A_A	Q17RC7	A	297	-30.524	-2.336	41.379	V/M		-1	14:103102217:C:T_T	Q17RC7	A	165	-64.832	-29.783	51.419	S/L		-1	14:103102282:G:A_A	Q17RC7	A	187	-52.967	-10.043	38.052	D/N
0	14:103568953:A:T_T	Q17RC7	A	298	-27.896	-5.081	41.894	Q/L		0	14:103102360:G:A_A	Q17RC7	A	213	-40.152	-6.076	48.399	E/K		-1	14:103102319:A:G_G	Q17RC7	A	199	-39.874	2.814	36.626	E/G
0	14:103568956:C:T_T	Q17RC7	A	299	-27.459	-4.325	45.682	P/L		-1	14:103102422:C:G_G	Q17RC7	A	233	-56.218	-26.702	40.133	D/E		-1	14:103102422:C:G_G	Q17RC7	A	233	-56.218	-26.702	40.133	D/E
0	14:103568991:G:A_A	Q17RC7	A	311	-30.669	-10.414	33.498	V/I		0	14:103102447:C:T_T	Q17RC7	A	242	-39.679	-14.661	38.134	R/C		-1	14:103102429:C:T_T	Q17RC7	A	236	-52.586	-23.302	42.998	R/C
-1	14:103570378:A:G_G	Q17RC7	A	384	-18.652	-3.718	-3.05	S/G		-1	14:103102499:G:T_T	Q17RC7	A	259	-36.372	5.495	22.286	R/L		-1	14:103102447:C:T_T	Q17RC7	A	242	-39.679	-14.661	38.134	R/C
-1	14:103570628:A:G_G	Q17RC7	A	396	-10.498	11.806	-9.87	S/G		0	14:103102612:G:A_A	Q17RC7	A	297	-30.524	-2.336	41.379	V/M		-1	14:103102616:A:T_T	Q17RC7	A	298	-27.896	-5.081	41.894	Q/L
-1	14:103570629:G:A_A	Q17RC7	A	396	-10.498	11.806	-9.87	S/N		0	14:103102616:A:T_T	Q17RC7	A	298	-27.896	-5.081	41.894	Q/L		-1	14:103102619:C:T_T	Q17RC7	A	299	-27.459	-4.325	45.682	P/L
1	14:103570694:T:C_C	Q17RC7	A	418	11.652	14.714	-10.133	Y/H		-1	14:103102691:G:A_A	Q17RC7	A	323	-31.878	-2.599	17.065	R/H		-1	14:103102654:G:A_A	Q17RC7	A	311	-30.669	-10.414	33.498	V/I
										-1	14:103103975:C:T_T	Q17RC7	A	362	-21.192	-13.366	32.542	P/S		-1	14:103102691:G:A_A	Q17RC7	A	323	-31.878	-2.599	17.065	R/H
1	14:103571370:C:T_T	Q17RC7	A	476	10.892	16.278	-16.374	P/L		-1	14:103103993:C:T_T	Q17RC7	A	368	-22.592	-11.47	18.676	P/S		-1	14:103103993:C:T_T	Q17RC7	A	368	-22.592	-11.47	18.676	P/S
1	14:103571374:C:G_G	Q17RC7	A	477	7.371	14.697	-16.496	H/Q		-1	14:103104017:G:T_T	Q17RC7	A	376	-20.802	-11.294	6.254	A/S		-1	14:103104291:A:G_G	Q17RC7	A	396	-10.498	11.806	-9.87	S/G
2	14:103573225:C:T_T	Q17RC7	A	524	15.052	12.449	-32.679	R/C		1	14:103104357:T:C_C	Q17RC7	A	418	11.652	14.714	-10.133	Y/H		-1	14:103104292:G:A_A	Q17RC7	A	396	-10.498	11.806	-9.87	S/N
2	14:103573764:C:G_G	Q17RC7	A	529	23.724	15.57	-36.28	L/V		-1	14:103104777:G:A_A	Q17RC7	A	442	-7.636	-7.789	9.675	A/T		-1	14:103104357:T:C_C	Q17RC7	A	418	11.652	14.714	-10.133	Y/H
1	14:103573857:C:T_T	Q17RC7	A	560	16.815	13.441	-11.23	R/C		-1	14:103105020:G:C_C	Q17RC7	A	472	2.673	17.929	-21.491	A/P		-1	14:103104777:G:A_A	Q17RC7	A	442	-7.636	-7.789	9.675	A/T
1	14:103573866:C:T_T	Q17RC7	A	563	18.467	4.298	-9.972	R/W		1	14:103106873:C:T_T	Q17RC7	A	519	14.951	7.94	-25.127	L/F		-1	14:103105033:C:T_T	Q17RC7	A	476	10.892	16.278	-16.374	P/L
2	14:103573995:G:A_A	Q17RC7	A	577	25.475	7.134	-29.986	V/M		-1	14:103106888:C:T_T	Q17RC7	A	524	15.052	12.449	-32.679	R/C		-1	14:103105037:C:G_G	Q17RC7	A	477	7.371	14.697	-16.496	H/Q
2	14:103574004:G:A_A	Q17RC7	A	580	24.536	5.503	-35.031	E/K		1	14:103107505:G:A_A	Q17RC7	A	555	22.037	13.234	-18.555	A/T		0	14:103106888:C:T_T	Q17RC7	A	524	15.052	12.449	-32.679	R/C
2	14:103574016:C:T_T	Q17RC7	A	584	27.172	6.093	-40.721	R/W		1	14:103107521:G:A_A	Q17RC7	A	560	16.815	13.441	-11.23	R/H		0	14:103107427:C:G_G	Q17RC7	A	529	23.724	15.57	-36.28	L/V
2	14:103574017:G:A_A	Q17RC7	A	584	27.172	6.093	-40.721	R/Q		1	14:103107529:C:T_T	Q17RC7	A	563	18.467	4.298	-9.972	R/W		-1	14:103107529:C:T_T	Q17RC7	A	563	18.467	4.298	-9.972	R/W
2	14:103574043:C:T_T	Q17RC7	A	593	42.353	8.211	-49.918	R/W		1	14:103107536:G:C_C	Q17RC7	A	565	16.309	3.368	-14.338	R/P		0	14:103107667:G:A_A	Q17RC7	A	580	24.536	5.503	-35.031	E/K
2	14:103574056:G:A_A	Q17RC7	A	597	42.266	8.343	-45.006	R/H		-1	14:103107664:C:T_T	Q17RC7	A	579	25.602	2.455	-32.942	R/C		0	14:103107679:C:T_T	Q17RC7	A	584	27.172	6.093	-40.721	R/W
2	14:103574790:G:A_A	Q17RC7	A	638	46.716	1.066	-40.488	E/K		-1	14:103107680:G:A_A	Q17RC7	A	584	27.172	6.093	-40.721	R/Q		0	14:103107680:G:A_A	Q17RC7	A	584	27.172	6.093	-40.721	R/Q
2	14:103576385:C:A_A	Q17RC7	A	665	31.794	-2.739	-44.958	A/D		-1	14:103107707:G:A_A	Q17RC7	A	593	42.353	8.211	-49.918	R/Q		-1	14:103107706:C:T_T	Q17RC7	A	593	42.353	8.211	-49.918	R/W
2	14:103576399:C:T_T	Q17RC7	A	670	40.357	0.508	-46.88	R/C		-1	14:103107737:A:G_G	Q17RC7	A	603	39.435	12.109	-36.492	K/R		-1	14:103107719:G:A_A	Q17RC7	A	597	42.266	8.343	-45.006	R/H
2	14:103576412:G:A_A	Q17RC7	A	674	40.326	-8.16	-54.359	R/H		-1	14:103108478:G:A_A	Q17RC7	A	646	45.221	-8.434	-36.096	R/Q		-1	14:103108453:G:A_A	Q17RC7	A	638	46.716	1.066	-40.488	E/K
2	14:103576417:C:T_T	Q17RC7	A	676	43.771	-9.298	-49.99	R/W		-1	14:103110074:C:T_T	Q17RC7	A	674	40.326	-8.16	-54.359	R/C		-1	14:103110075:G:A_A	Q17RC7	A	674	40.326	-8.16	-54.359	R/H
2	14:103576427:A:G_G	Q17RC7	A	679	42.232	-13.525	-47.726	H/R		-1	14:103110075:G:A_A	Q17RC7	A	674	40.326	-8.16	-54.359	R/H		-1	14:103110080:C:T_T	Q17RC7	A	676	43.771	-9.298	-49.99	R/W
-1	14:103576468:G:A_A	Q17RC7	A	693	29.972	-21.83	-31.756	G/R		2	14:103110126:C:T_T	Q17RC7	A	691	32.7	-17.184	-32.086	A/V		-1	14:103110090:A:G_G	Q17RC7	A	679	42.232	-13.525	-47.726	H/R
-1	14:103576481:C:T_T	Q17RC7	A	697	26.934	-21.349	-24.008	A/V		2	14:103110131:G:A_A	Q17RC7	A	693	29.972	-21.83	-31.756	G/R		-1	14:103110126:C:T_T	Q17RC7	A	691	32.7	-17.184	-32.086	A/V
2	14:103576493:G:A_A	Q17RC7	A	701	22.404	-11.713	-23.085	R/Q		2	14:103110134:G:A_A	Q17RC7	A	694	31.092	-20.35	-28.374	A/T		-1	14:103110131:G:A_A	Q17RC7	A	693	29.972	-21.83	-31.756	G/R
2	14:103576504:C:G_G	Q17RC7	A	705	25.764	-3.47	-30.94	L/V		2	14:103110138:C:T_T	Q17RC7	A	695	28.193	-17.807	-28.104	A/V		-1	14:103110138:C:T_T	Q17RC7	A	695	28.193	-17.807	-28.104	A/V
										2	14:103110149:G:T_T	Q17RC7	A	699	27.317	-14.8	-24.19	A/S		-1	14:103110144:C:T_T	Q17RC7	A	697	26.934	-21.349	-24.008	A/V
										2	14:103110150:C:A_A	Q17RC7	A	699	27.317	-14.8	-24.19	A/D
										-1	14:103110218:G:A_A	Q17RC7	A	722	38.867	-2.809	-56.923	V/I

## Sheet: Supplemental_ Table_ S8
Supplemental Table S8. The variant clusters were identified for CSF1R in the ADSP WES discovery and ADSP Validation datasets.
ADSP WES Discovery(10k)										ADSP Validation
Case cluster										Case cluster
grp	varcode	structure	chain	structure_position	x	y	z	aa		grp	varcode	structure	chain	structure_position	x	y	z	aa
-1	5:149449827:C:T_T	4liq	E	413	-55.581	-43.361	-27.043	G/S		-1	5:150069891:A:G_G	4liq	E	498	-41.79	-31.467	-18.472	F/L
-1	5:149452904:C:T_T	4liq	E	348	-4.222	-30.156	-46.131	E/K		-1	5:150070264:C:T_T	4liq	E	413	-55.581	-43.361	-27.043	G/S
-1	5:149456847:C:T_T	4liq	E	294	21.405	-51.141	-46.333	R/Q		-1	5:150070285:C:T_T	4liq	E	406	-39.39	-34.917	-23.316	V/I
-1	5:149457683:T:C_C	4liq	E	241	36.103	-53.709	-39.274	N/D		-1	5:150070521:C:T_T	4liq	E	378	-12.776	-42.808	-41.393	R/H
-1	5:149459720:T:C_C	4liq	E	163	35.063	-12.595	-45.84	T/A		-1	5:150073341:C:T_T	4liq	E	348	-4.222	-30.156	-46.131	E/K
-1	5:149459750:T:G_G	4liq	E	153	40.185	-7.576	-41.378	N/H		-1	5:150077358:A:T_T	4liq	E	269	25.127	-56.179	-53.851	D/E
0	5:149459839:G:C_C	4liq	E	123	34.707	-16.729	-42.5	A/G		0	5:150077401:T:A_A	4liq	E	255	43.983	-22.855	-43.114	N/I
0	5:149459876:G:T_T	4liq	E	111	21.822	-17.293	-47.86	L/I		-1	5:150078120:T:C_C	4liq	E	241	36.103	-53.709	-39.274	N/D
0	5:149459890:C:T_T	4liq	E	106	16.242	-5.222	-51.263	R/Q		0	5:150080157:T:C_C	4liq	E	163	35.063	-12.595	-45.84	T/A
0	5:149459891:G:A_A	4liq	E	106	16.242	-5.222	-51.263	R/W		0	5:150080187:T:G_G	4liq	E	153	40.185	-7.576	-41.378	N/H
0	5:149460408:G:C_C	4liq	E	77	16.111	-14.325	-53.633	Q/E		0	5:150080202:G:A_A	4liq	E	148	30.822	-0.898	-35.25	L/F
0	5:149460479:G:A_A	4liq	E	53	20.903	-21.764	-53.937	P/L		0	5:150080276:G:C_C	4liq	E	123	34.707	-16.729	-42.5	A/G
										0	5:150080289:C:T_T	4liq	E	119	39.893	-19.666	-35.026	E/K
										0	5:150080313:G:T_T	4liq	E	111	21.822	-17.293	-47.86	L/I
										1	5:150080327:C:T_T	4liq	E	106	16.242	-5.222	-51.263	R/Q
										1	5:150080778:A:G_G	4liq	E	99	22.277	-13.818	-61.598	L/P
										1	5:150080791:C:T_T	4liq	E	95	30.619	-23.744	-66.06	A/T
										1	5:150080845:G:C_C	4liq	E	77	16.111	-14.325	-53.633	Q/E
										1	5:150080854:C:T_T	4liq	E	74	12.255	-12.935	-60.707	A/T
										1	5:150080964:G:A_A	4liq	E	37	11.442	-14.051	-66.8	T/M
Control cluster										Control cluster
grp	varcode	structure	chain	structure_position	x	y	z	aa		grp	varcode	structure	chain	structure_position	x	y	z	aa
-1	5:149449526:C:T_T	4liq	E	474	-49.38	-41.361	-17.059	V/I		-1	5:150069963:C:T_T	4liq	E	474	-49.38	-41.361	-17.059	V/I
-1	5:149449781:T:C_C	4liq	E	428	-29.728	-45.07	-19.444	N/S		-1	5:150070218:T:C_C	4liq	E	428	-29.728	-45.07	-19.444	N/S
-1	5:149449848:C:T_T	4liq	E	406	-39.39	-34.917	-23.316	V/I		-1	5:150070476:G:A_A	4liq	E	393	-7.313	-46.276	-42.315	T/M
1	5:149450060:G:A_A	4liq	E	386	8.208	-47.037	-57.144	P/L		-1	5:150070477:T:A_A	4liq	E	393	-7.313	-46.276	-42.315	T/S
-1	5:149450109:G:A_A	4liq	E	370	-11.273	-29.569	-30.69	R/C		0	5:150070497:G:A_A	4liq	E	386	8.208	-47.037	-57.144	P/L
-1	5:149452975:A:G_G	4liq	E	324	5.423	-43.911	-39.664	M/T		-1	5:150070546:G:A_A	4liq	E	370	-11.273	-29.569	-30.69	R/C
-1	5:149453003:C:T_T	4liq	E	315	-16.345	-34.496	-28.544	V/M		-1	5:150073412:A:G_G	4liq	E	324	5.423	-43.911	-39.664	M/T
-1	5:149453022:G:C_C	4liq	E	308	-4.748	-48.458	-32.697	N/K		-1	5:150073440:C:T_T	4liq	E	315	-16.345	-34.496	-28.544	V/M
1	5:149453051:C:T_T	4liq	E	299	11.831	-51.049	-53.714	A/T		0	5:150073488:C:T_T	4liq	E	299	11.831	-51.049	-53.714	A/T
0	5:149456893:C:T_T	4liq	E	279	38.591	-43.496	-38.739	V/M		0	5:150077284:C:T_T	4liq	E	294	21.405	-51.141	-46.333	R/Q
0	5:149456898:G:A_A	4liq	E	277	33.508	-46.44	-40.234	S/F		-1	5:150077330:C:T_T	4liq	E	279	38.591	-43.496	-38.739	V/M
1	5:149456926:C:T_T	4liq	E	268	25.929	-52.684	-55.238	V/I		0	5:150077363:C:T_T	4liq	E	268	25.929	-52.684	-55.238	V/I
-1	5:149456961:C:T_T	4liq	E	256	43.35	-26.638	-42.853	R/H		-1	5:150077398:C:T_T	4liq	E	256	43.35	-26.638	-42.853	R/H
-1	5:149456964:T:A_A	4liq	E	255	43.983	-22.855	-43.114	N/I		-1	5:150078156:C:T_T	4liq	E	229	45.48	-27.739	-38.782	V/I
0	5:149456995:C:A_A	4liq	E	245	42.083	-49.608	-50.125	A/S		0	5:150078187:C:G_G	4liq	E	218	22.268	-49.592	-58.127	E/D
0	5:149457737:C:T_T	4liq	E	223	32.714	-40.176	-48.779	V/M		0	5:150078200:C:T_T	4liq	E	214	20.191	-49.006	-52.231	R/Q
1	5:149457750:C:G_G	4liq	E	218	22.268	-49.592	-58.127	E/D		0	5:150078212:G:T_T	4liq	E	210	24.844	-40.527	-42.5	A/E
1	5:149457763:C:T_T	4liq	E	214	20.191	-49.006	-52.231	R/Q		-1	5:150080069:C:T_T	4liq	E	192	25.581	-14.599	-36.583	R/Q
0	5:149457775:G:T_T	4liq	E	210	24.844	-40.527	-42.5	A/E		-1	5:150080195:C:T_T	4liq	E	150	37.07	-3.881	-33.432	R/H
-1	5:149459632:C:T_T	4liq	E	192	25.581	-14.599	-36.583	R/Q		-1	5:150080328:G:A_A	4liq	E	106	16.242	-5.222	-51.263	R/W
2	5:149460389:C:T_T	4liq	E	83	27.038	-23.841	-61.546	R/H		1	5:150080826:C:T_T	4liq	E	83	27.038	-23.841	-61.546	R/H
2	5:149460437:C:T_T	4liq	E	67	19.015	-28.915	-67.933	S/N		1	5:150080874:C:T_T	4liq	E	67	19.015	-28.915	-67.933	S/N
-1	5:149460542:A:C_C	4liq	E	32	17.429	-8.557	-64.376	V/G		-1	5:150080979:A:C_C	4liq	E	32	17.429	-8.557	-64.376	V/G
2	5:149460552:C:T_T	4liq	E	29	27.003	-12.388	-65.078	E/K		1	5:150080989:C:T_T	4liq	E	29	27.003	-12.388	-65.078	E/K
2	5:149460567:C:G_G	4liq	E	24	22.896	-19.97	-72.392	E/Q		1	5:150081004:C:G_G	4liq	E	24	22.896	-19.97	-72.392	E/Q
2	5:149460576:G:A_A	4liq	E	21	29.346	-27.786	-70.297	P/S		1	5:150081013:G:A_A	4liq	E	21	29.346	-27.786	-70.297	P/S
